# Supplementary material for: Organoselenium-catalyzed synthesis of indoles through intramolecular C–H amination
Source: Royal Society of Chemistry journal article supplement (doi:10.1039/c5qo00179j), 2015-01-01

Supporting Information for

# **Organoselenium-Catalyzed Synthesis of Indoles Through Intramolecular C–H Amination**

Xuelin Zhang, Ruizhi Guo, and Xiaodan Zhao\*

*Institute of Organic Chemistry & MOE Key Laboratory of Bioinorganic and Synthetic Chemistry,  
School of Chemistry and Chemical Engineering, Sun Yat-Sen University, Guangzhou 510275, China*

*E-mail: zhaofd3@mail.sysu.edu.cn*

## **Contents**

|                                                                           |     |
|---------------------------------------------------------------------------|-----|
| 1. General Methods.....                                                   | S2  |
| 2. Procedures for the Preparation of Substrates .....                     | S2  |
| 3. General Procedure for the Synthesis of Indoles via C–H Amination ..... | S21 |
| 4. Characterization Data for Products.....                                | S21 |
| 5. NMR Spectra for Substrates and Products.....                           | S32 |

## 1. General Methods

Unless otherwise stated, commercial reagents were purchased from Alfa, Aladdin, TCI, J&K, Accela or Adamas and used without further purification. 1,4-Dioxane, THF, toluene and Et<sub>2</sub>O were distilled from sodium prior to use. EtOAc was distilled from P<sub>2</sub>O<sub>5</sub>. MeCN, DCM and DCE were distilled from calcium hydride. Deuterated chloroform was basified over potassium carbonate. All catalytic reactions were carried out using pre-dried glassware. Reactions were monitored by thin-layer chromatography. Flash column chromatography was carried out using 200-300 mesh silica gel (Qingdao, China), and petroleum ether (60-90 °C) was used.

<sup>1</sup>H, <sup>13</sup>C{<sup>1</sup>H} and <sup>19</sup>F NMR spectra were recorded on Bruker ARX 400 MHz spectrometer at ambient temperature. All NMR spectra are referenced to the residual solvent signal. Data for <sup>1</sup>H NMR are reported as follows: chemical shift (δ ppm), multiplicity (s = singlet, d = doublet, t = triplet, q = quartet, m = multiplet, br = broad), coupling constant (Hz), integration. Data for <sup>13</sup>C{<sup>1</sup>H} NMR are reported as follows: chemical shift (δ ppm), multiplicity (d = doublet, t = triplet, q = quartet), coupling constant (Hz).

MS and HRMS were recorded on Thermo MAT95XP mass spectrometer at analytical center of Sun Yat-Sen University.

## 2. Procedures for the Preparation of Substrates

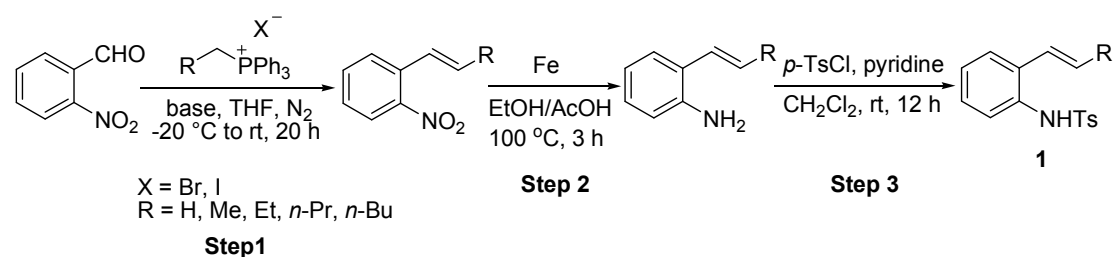

**Method A:** To a solution of triphenylphosphine (1.2 equiv) in dry solvent (acetonitrile or toluene) in a Schlenk tube was added RX (1.3 equiv) dropwise with minimal stirring under a nitrogen atmosphere to give a clear solution. This resulting

solution was refluxed for hours (36 h in acetonitrile or 48 h in toluene) resulting in the formation of a white precipitate. Then the crude mixture was cooled and the solvent was removed via cannula. The white crystals were washed with Et<sub>2</sub>O (10 mL × 3) and the solvent was removed again via cannula to give the phosphonium salt in quantitative yield.

To a solution of phosphonium salt in THF (0.5 M) was added base (1.4 equiv) dropwise at -20 °C under nitrogen. The reaction mixture was stirred at -20 °C for one hour. Then, a solution of 2-nitrobenzaldehyde (1.0 equiv) in THF was added and the mixture was stirred at -20 °C to rt for 20 hours. The reaction was quenched by the addition of a saturated aqueous solution of NH<sub>4</sub>Cl. The aqueous phase was extracted with EtOAc (10 mL × 3) and washed with brine. The combined organic layers were dried over Na<sub>2</sub>SO<sub>4</sub>, filtered and evaporated under reduced pressure. The obtained residue was purified by flash column chromatography on silica gel (eluent: petroleum ether) to afford the corresponding 2-nitrostyrene product.

To a solution of 2-nitrostyrene (1.0 equiv) in EtOH/AcOH (1:1, v/v, 0.25 M) was added Fe powder (4.0 equiv). The mixture was stirred at 100 °C for 3 hours under nitrogen, and then cooled to room temperature and filtered through a pad of Celite. The solvents were evaporated under reduced pressure. The resulting residue was dissolved in diethyl ether and extracted with 2 M hydrochloric acid. The aqueous fraction was basified using concentrated aqueous sodium hydroxide solution and the product amine was extracted with EtOAc (10 mL × 3). The combined organic fractions were dried over Na<sub>2</sub>SO<sub>4</sub>, filtered and evaporated under reduced pressure to yield the corresponding product (if necessary, the product was further purified by flash column chromatography on silica gel (eluent: petroleum ether : EtOAc = 100:1, v/v)).

To a solution of 2-styrylaniline (1.0 equiv) in DCM (0.25 M) were added pyridine (1.1 equiv) and *p*-toluenesulfonyl chloride (1.1 equiv) at room temperature under nitrogen. After being stirred at room temperature for 12 hours, the reaction mixture was quenched by the addition of a saturated aqueous solution of NH<sub>4</sub>Cl and then the product was extracted with DCM (10 mL × 3). The combined organic phase was

washed with brine, dried over Na<sub>2</sub>SO<sub>4</sub>, filtered and concentrated under reduced pressure. The residue was purified by flash column chromatography on silica gel (eluent: petroleum ether : EtOAc = 100:1→20:1, v/v) to give the corresponding product **1**.<sup>1</sup>

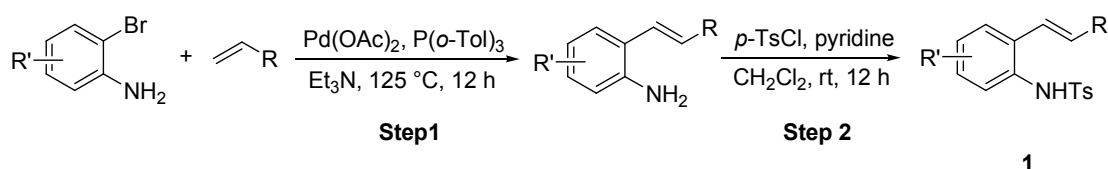

**Method B:**<sup>2</sup> To a solution of 2-bromoaniline (3.0 mmol, 1.0 equiv) in Et<sub>3</sub>N (3.0 mL) were added Pd(OAc)<sub>2</sub> (1.0 mol%), P(*o*-Tol)<sub>3</sub> (8.0 mol%), and olefin (3.6 mmol, 1.2 equiv). After being stirred at 125 °C for 12 hours, the reaction mixture was poured into water and then the product was extracted with DCM (10 mL × 3). The combined organic layer was washed with brine, dried over Na<sub>2</sub>SO<sub>4</sub>, and concentrated under reduced pressure. The residue was purified by flash column chromatography on silica gel (eluent: petroleum ether : EtOAc = 30:1, v/v) to afford the corresponding product 2-styrylaniline.

To a solution of 2-styrylaniline (1.0 equiv) in DCM (0.25 M) was added pyridine (1.1 equiv.) and *p*-toluenesulfonyl chloride (1.1 equiv.) at room temperature under nitrogen. After being stirred at room temperature for 12 hours, the reaction mixture was quenched by the addition of a saturated aqueous solution of NH<sub>4</sub>Cl and then the product was extracted with DCM (3 × 10 mL), washed with brine, dried over Na<sub>2</sub>SO<sub>4</sub>, filtered and concentrated in vacuo. The residue was purified by flash column chromatography on silica gel (petroleum ether : EtOAc = 100:1→20:1, v/v) to give the corresponding product **1**.

**(*E*)-*N*-(2-(But-1-en-1-yl)phenyl)-4-methylbenzenesulfonamide (1a)**

<sup>1</sup> Laha, J. K.; Jethava, K. P.; Dayal, N. *J. Org. Chem.* **2014**, 79, 8010-8019.

<sup>2</sup> Jang, Y. H.; Youn, S. W. *Org. Lett.* **2014**, 16, 3720-3723.

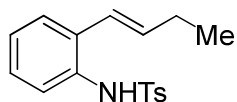

Prepared by the Method A: Triphenyl(propyl)phosphonium bromide was synthesized following a previously described procedure.<sup>3</sup> Triphenylphosphine (6.30 g, 24.0 mmol, 1.2 equiv), 1-bromopropane (3.27 mL, 36.0 mmol, 1.8 equiv), and acetonitrile (20.0 mL) were mixed together in a Schlenk flask under a nitrogen atmosphere to give a clear solution, and this solution was heated at 82 °C for 36 h resulting in the formation of a white precipitate. Then the crude mixture was cooled and the solvent was removed via cannula. The white crystals were washed with Et<sub>2</sub>O (20 mL × 3) and the solvent was removed again via cannula to give the phosphonium salt in quantitative yield. Use 2-nitrobenzaldehyde (3.02 g, 20.0 mmol, 1.0 equiv) and NaHMDS (2 M) in THF as the base in step 2.<sup>4</sup>

**Step 1:** 3.37 g, 95% yield and a light yellow oil. Column chromatography: petroleum ether as the eluent.

**Step 2:** 2.38 g, 90% yield and a yellow oil.

**Step 3:** 2.56 g, 85% yield and a white solid. Column chromatography: petroleum ether : EtOAc = 100:1 → 20:1, v/v.

<sup>1</sup>H NMR (400 MHz, CDCl<sub>3</sub>) δ 7.64 (d, *J* = 8.3 Hz, 2H), 7.54 (d, *J* = 8.1 Hz, 1H), 7.20 (dd, *J* = 11.9, 5.0 Hz, 3H), 7.08 – 6.97 (m, 2H), 6.75 (s, 1H), 5.90 (d, *J* = 11.3 Hz, 1H), 5.76 (dt, *J* = 11.2, 7.3 Hz, 1H), 2.34 (s, 3H), 1.90 (pd, *J* = 7.5, 1.4 Hz, 2H), 0.90 (t, *J* = 7.5 Hz, 3H).

<sup>13</sup>C NMR (101 MHz, CDCl<sub>3</sub>) δ 143.8, 139.1, 136.6, 134.2, 129.8, 129.6, 129.5, 129.3, 128.0, 127.1, 124.6, 122.9, 121.2, 77.5, 77.2, 76.8, 21.8, 21.5, 13.9.

HR-ESI-MS *m/z* calcd. C<sub>17</sub>H<sub>20</sub>O<sub>2</sub>NS [M + H<sup>+</sup>]: 302.12093, found 302.12082.

**(*E*)-N-(2-(But-1-en-1-yl)phenyl)-4-nitrobenzenesulfonamide (1b)**

<sup>3</sup> Hung, K. Y.; Harris, P. W. R.; M. Brimble, A. *Org. Lett.* 2012, 14, 5784-5787.

<sup>4</sup> Arisawa, M.; Fujii, Y.; Kato, H.; Fukuda, H.; Matsumoto, T.; Ito, M.; Abe, H.; Ito, Y.; Shuto, S. *Angew. Chem. Int. Ed.* **2013**, 52, 1003-1010.

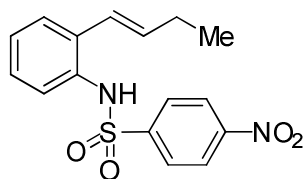

Prepared by the Method A: Use 4-nitrobenzenesulfonyl chloride as a sulfonylation reagent in place of *p*-TsCl. 2-(But-1-en-1-yl)aniline (294.4 mg, 2.0 mmol, 1.0 equiv) was used as the starting material to give the product as a white solid (534.6 mg, 81% yield). Column chromatography: petroleum ether : EtOAc = 100:1→15:1, v/v in step 3.

$^1\text{H}$  NMR (400 MHz,  $\text{CDCl}_3$ )  $\delta$  8.26 (d,  $J = 9.0$  Hz, 2H), 7.92 (d,  $J = 9.0$  Hz, 2H), 7.56 (d,  $J = 8.1$  Hz, 1H), 7.29 – 7.24 (m, 2H), 7.14 (t,  $J = 7.5$  Hz, 1H), 7.05 (d,  $J = 7.6$  Hz, 1H), 6.67 (s, 1H), 5.84 – 5.74 (m, 2H), 1.94 – 1.87 (m, 2H), 0.92 (t,  $J = 7.5$  Hz, 3H).

$^{13}\text{C}$  NMR (101 MHz,  $\text{CDCl}_3$ )  $\delta$  150.3, 145.2, 139.8, 133.1, 130.2, 129.9, 128.6, 128.5, 128.5, 128.2, 127.6, 127.4, 125.8, 124.3, 124.3, 122.5, 121.9, 77.5, 77.2, 76.84, 21.9, 14.0.

HR-ESI-MS  $m/z$  calcd.  $\text{C}_{16}\text{H}_{15}\text{O}_4\text{N}_2\text{S}$  [ $\text{M} - \text{H}^+$ ]: 331.07525, found 331.07532.

#### (*E*)-Benzyl (2-(but-1-en-1-yl)phenyl)carbamate

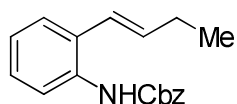

Prepared by the Method A: Use  $\text{ClCO}_2\text{Bn}$  in place of *p*-TsCl. 2-(But-1-en-1-yl)aniline (220.8 mg, 1.5 mmol, 1.0 equiv) was used as the starting material to give the product as a white solid (242.1 mg, 57% yield). Column chromatography: petroleum ether : EtOAc = 100:1→60:1, v/v in step 3.

$^1\text{H}$  NMR (400 MHz,  $\text{CDCl}_3$ )  $\delta$  8.06 (s, 1H), 7.43 – 7.30 (m, 5H), 7.26 (t,  $J = 7.8$  Hz, 1H), 7.09 (d,  $J = 6.2$  Hz, 1H), 7.02 (t,  $J = 7.4$  Hz, 1H), 6.73 (s, 1H), 6.25 (d,  $J = 11.2$  Hz, 1H), 5.89 – 5.82 (m, 1H), 5.19 (s, 2H), 2.06 – 2.02 (m, 2H), 0.96 (t,  $J = 7.5$  Hz, 3H).

$^{13}\text{C}$  NMR (101 MHz,  $\text{CDCl}_3$ )  $\delta$  153.4, 138.8, 136.2, 135.4, 129.5, 128.7, 128.5, 128.5, 128.0, 123.6, 123.0, 119.1, 67.1, 22.2, 14.0.

HR-ESI-MS  $m/z$  calcd.  $C_{18}H_{20}O_2N$   $[M + H^+]$ : 282.14886, found 282.14862.

**(*E*)-*N*-(2-(But-1-en-1-yl)phenyl)acetamide**

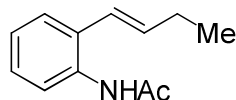

(*E*)-*N*-(2-(But-1-en-1-yl)phenyl)acetamide was synthesized following a previously described procedure.<sup>5</sup> To a solution of 2-(but-1-en-1-yl)aniline (147.2 mg, 1.0 mmol, 1.0 equiv) in DCM (5.0 mL) was added  $Ac_2O$  (112.4  $\mu$ L, 1.2 mmol, 1.2 equiv.) at room temperature under nitrogen. After being stirred at room temperature for 12 hours, the reaction mixture was quenched by the addition of a saturated aqueous solution of  $NaHCO_3$  and then the product was extracted with DCM, washed with brine, dried over  $Na_2SO_4$ , filtered and concentrated under reduced pressure. The residue was purified by flash column chromatography on silica gel (eluent: petroleum ether : EtOAc = 30:1 $\rightarrow$ 10:1, v/v) to give the corresponding product (131.5 mg, 70% yield) as a white solid.

$^1H$  NMR (400 MHz,  $CDCl_3$ )  $\delta$  8.18 (d,  $J$  = 8.2 Hz, 1H), 7.26 (t,  $J$  = 7.7 Hz, 2H), 7.16 – 7.02 (m, 2H), 6.29 (d,  $J$  = 11.2 Hz, 1H), 5.93 – 5.87 (m, 1H), 2.16 (s, 3H), 2.12 – 2.01 (m, 2H), 1.01 (s, 3H).

$^{13}C$  NMR (101 MHz,  $CDCl_3$ )  $\delta$  168.1, 138.7, 135.4, 129.4, 127.9, 127.4, 123.8, 123.7, 121.0, 24.8, 22.1, 14.1.

HR-ESI-MS  $m/z$  calcd.  $C_{12}H_{16}ON$   $[M + H^+]$ : 190.12264, found 190.12267.

**(*E*)-*t*-Butyl (2-(but-1-en-1-yl)phenyl)carbamate**

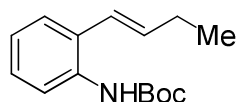

(*E*)-*t*-Butyl (2-(but-1-en-1-yl)phenyl)carbamate was synthesized following a previously described procedure.<sup>6</sup> To a solution of 2-(but-1-en-1-yl)aniline (147.2 mg, 1.0 mmol, 1.0 equiv) in EtOH (8.0 mL) was added  $Boc_2O$  (436.5 mg, 2.0 mmol, 2.0

<sup>5</sup> Mešková, M.; Putala, M. *Tetrahedron Lett.* **2011**, 52, 5379-5383.

<sup>6</sup> Hellal, M.; Cuny, G. D. *J. Org. Chem.* **2010**, 75, 3465-3468.

equiv) at room temperature under nitrogen. After being stirred at 90 °C for 24 hours, the solvent was removed and the reaction mixture was quenched by the addition of a saturated aqueous solution of NaHCO<sub>3</sub>, then the product was extracted with DCM, washed with brine, dried over Na<sub>2</sub>SO<sub>4</sub>, filtered and concentrated under reduced pressure. The residue was purified by flash column chromatography on silica gel (eluent: petroleum ether : EtOAc = 200:1→100:1, v/v) to give the corresponding product (223.4 mg, 90% yield) as a light yellow oil.

<sup>1</sup>H NMR (400 MHz, CDCl<sub>3</sub>) δ 8.02 (d, *J* = 8.0 Hz, 1H), 7.30 – 7.17 (m, 1H), 7.08 (d, *J* = 6.5 Hz, 1H), 6.99 (t, *J* = 7.4 Hz, 1H), 6.52 (s, 1H), 6.27 (d, *J* = 11.2 Hz, 1H), 5.95 – 5.77 (m, 1H), 2.11 – 2.03 (m, 2H), 1.51 (s, 9H), 0.99 (t, *J* = 7.5 Hz, 3H).

<sup>13</sup>C NMR (101 MHz, CDCl<sub>3</sub>) δ 152.8, 138.5, 135.9, 129.4, 127.9, 123.8, 122.5, 119.1, 80.5, 28.5, 22.1, 14.1.

HR-ESI-MS *m/z* calcd. C<sub>15</sub>H<sub>22</sub>O<sub>2</sub>N [M + H<sup>+</sup>]: 248.16451, found 248.16462.

**(*E*)-*N*-(2-(But-1-en-1-yl)phenyl)ethanesulfonamide (1b)**

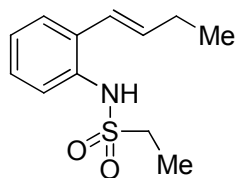

Prepared by the Method A: Use ethanesulfonyl chloride as a sulfonylation reagent in place of *p*-TsCl. 2-(But-1-en-1-yl)aniline (294.4 mg, 2.0 mmol, 1.0 equiv) was used as the starting material to give the product as a light yellow oil (392.3 mg, 82% yield).

Column chromatography: petroleum ether : EtOAc = 100:1→20:1, v/v in step 3.

<sup>1</sup>H NMR (400 MHz, CDCl<sub>3</sub>) δ 7.56 (d, *J* = 8.2 Hz, 1H), 7.26 (t, *J* = 7.7 Hz, 1H), 7.19 – 7.06 (m, 2H), 6.39 (s, 1H), 6.30 (d, *J* = 11.2 Hz, 1H), 5.98 – 5.91 (m, 1H), 3.13 (q, *J* = 7.4 Hz, 2H), 2.09 – 2.05 (m, 2H), 1.33 (t, *J* = 7.4 Hz, 3H), 1.00 (t, *J* = 7.5 Hz, 3H).

<sup>13</sup>C NMR (101 MHz, CDCl<sub>3</sub>) δ 139.9, 134.7, 130.3, 128.5, 127.9, 124.2, 123.0, 118.9, 46.3, 22.1, 14.0, 8.3.

HR-ESI-MS *m/z* calcd. C<sub>12</sub>H<sub>18</sub>O<sub>2</sub>NS [M + H<sup>+</sup>]: 240.10528, found 240.10543.



#### 4-Methyl-*N*-(2-vinylphenyl)benzenesulfonamide (1d)

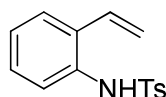

Prepared by the Method A: Methyltriphenylphosphonium iodide was synthesized following a literature protocol.<sup>7</sup> To a solution of PPh<sub>3</sub> (3.15 g, 12.0 mmol, 1.2 equiv) in dry THF (20 mL) in a Schlenk tube was added MeI (809.3  $\mu$ L, 13.0 mmol, 1.3 equiv) dropwise with minimal stirring. A white precipitate was formed immediately. After stirring overnight at room temperature, the solvent was removed via cannula. The white crystals were washed with Et<sub>2</sub>O (5 mL  $\times$  3) and the solvent was removed again via cannula to give the phosphonium salt in quantitative yield (step 1). Use 2-nitrobenzaldehyde (1.51 g, 10.0 mmol, 1.0 equiv) and NaHMDS (2 M) in THF as the base in step 1.<sup>2</sup> Use HCl in place of AcOH in step 2.<sup>8</sup>

**Step 1:** 1.18 g, 79% yield and a light yellow oil. Column chromatography: petroleum ether as the eluent.

**Step 2:** 847.2 mg 90% yield and a yellow oil. Column chromatography: petroleum ether : EtOAc = 200:1  $\rightarrow$  80:1, v/v (step 2)

**Step 3:** 2-Vinylaniline (238.3 mg, 2.0 mmol, 1.0 equiv) to give the product as a white solid (270 mg, yield 49%). Column chromatography: petroleum ether : EtOAc = 100:1  $\rightarrow$  20:1, v/v. The NMR data match the reported in the literature.<sup>9</sup>

<sup>1</sup>H NMR (400 MHz, CDCl<sub>3</sub>)  $\delta$  7.60 (d,  $J$  = 8.3 Hz, 2H), 7.36 – 7.31 (m, 2H), 7.25 – 7.11 (m, 4H), 6.61 – 6.46 (m, 2H), 5.50 (dd,  $J$  = 17.4, 1.2 Hz, 1H), 5.26 (dd,  $J$  = 11.0, 1.1 Hz, 1H), 2.38 (s, 3H).

#### (*Z*)-4-Methyl-*N*-(2-(pent-1-en-1-yl)phenyl)benzenesulfonamide (1e)

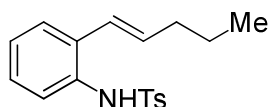

<sup>7</sup> Braddock, D. C.; Clarke, J.; Rzepa, H. S. *Chem. Commun.*, **2013**, 49, 11176-11178.

<sup>8</sup> Fra, L.; Millan, A.; Souto, J. A.; Muniz, K. *Angew. Chem., Int. Ed.* **2014**, 53, 7349-7353.

<sup>9</sup> He, H.; Liu, W. B.; Dai, L. X.; You, S. L. *J. Am. Chem. Soc.* **2009**, 131, 8346-8347.

Prepared by the Method A: Butyltriphenylphosphonium bromide was synthesized following a previously described procedure (step 1).<sup>3</sup> Use 2-nitrobenzaldehyde (755.6 mg, 5.0 mmol, 1.0 equiv) and *n*-BuLi (2.5 M) in hexanes as the base in step 1.<sup>10</sup>

**Step 1:** 820.0 mg, 86% yield and a light yellow oil. Column chromatography: petroleum ether as the eluent.

**Step 2:** 622.5 mg, 90% yield and a yellow oil. Column chromatography: petroleum ether : EtOAc = 100:1, v/v.

**Step 3:** 210 g, 17% yield and a white solid. Column chromatography: petroleum ether : EtOAc = 100:1→20:1, v/v.

<sup>1</sup>H NMR (400 MHz, CDCl<sub>3</sub>) δ 7.60 (d, *J* = 8.3 Hz, 2H), 7.36 (d, *J* = 7.9 Hz, 1H), 7.27 (d, *J* = 5.2 Hz, 1H), 7.21 (d, *J* = 8.0 Hz, 2H), 7.19 – 7.08 (m, 2H), 6.46 (s, 1H), 6.06 (d, *J* = 15.7 Hz, 1H), 5.95 – 5.88 (m, 1H), 2.38 (s, 3H), 2.12 – 2.01 (m, 2H), 1.49 – 1.32 (m, 2H), 0.91 (t, *J* = 7.4 Hz, 3H).

<sup>13</sup>C NMR (101 MHz, CDCl<sub>3</sub>) δ 143.9, 136.7, 135.9, 132.9, 132.7, 129.7, 127.9, 127.3, 127.2, 126.4, 124.8, 124.1, 35.4, 22.4, 21.7, 13.8.

HR-ESI-MS *m/z* calcd. C<sub>17</sub>H<sub>20</sub>O<sub>2</sub>NS [M + H<sup>+</sup>]: 302.12093, found 302.12082.

**(*E*)-*N*-(2-(Hept-1-en-1-yl)phenyl)-4-methylbenzenesulfonamide (1f)**

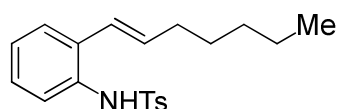

Prepared by the Method A: Hexyltriphenylphosphonium bromide was synthesized following the previously described procedure.<sup>11</sup> Use toluene as the solvent, 2-nitrobenzaldehyde (1.51 g, 10.0 mmol, 1.0 equiv) and *n*-BuLi (2.5 M) in hexanes as the base in step 1.<sup>11</sup>

**Step 1:** 1.97 g, 90% yield and a light yellow oil. Column chromatography: petroleum ether as the eluent.

**Step 2:** 990.0 mg, 58% yield and a yellow oil. Column chromatography: petroleum ether : EtOAc = 100:1, v/v.

<sup>10</sup> Ceita, L.; Maiti, A. K.; Mestres, R.; Tortajada, A. *J. Chem. Research (S)*, **2001**, 403-404.

<sup>11</sup> Dickschat, J. S.; Helmke, E.; Schulz, S. *Chem. Biodivers.* **2005**, 2, 318-353.

**Step 3:** 2-(Pent-1-en-1-yl)aniline (378.6 g, 2.0 mmol, 1.0 equiv) to give the product as a white solid (535.8 g, 78% yield). Column chromatography: petroleum ether : EtOAc = 100:1→20:1, v/v.

$^1\text{H}$  NMR (400 MHz,  $\text{CDCl}_3$ )  $\delta$  7.60 (d,  $J$  = 8.3 Hz, 2H), 7.36 (dd,  $J$  = 7.9, 1.3 Hz, 1H), 7.26 (dd,  $J$  = 7.5, 1.6 Hz, 1H), 7.21 (d,  $J$  = 8.0 Hz, 2H), 7.19 – 7.08 (m, 2H), 6.54 (s, 1H), 6.07 (d,  $J$  = 15.7 Hz, 1H), 5.91 (dt,  $J$  = 15.6, 6.7 Hz, 1H), 2.38 (s, 3H), 2.10 – 2.04 (m, 2H), 1.37 – 1.25 (m, 6H), 0.91 (t,  $J$  = 7.0 Hz, 3H).

$^{13}\text{C}$  NMR (101 MHz,  $\text{CDCl}_3$ )  $\delta$  143.9, 136.7, 136.2, 132.9, 132.7, 129.7, 127.9, 127.3, 127.2, 126.4, 124.8, 123.83, 33.3, 31.6, 28.9, 22.7, 21.7, 14.2.

HR-ESI-MS  $m/z$  calcd.  $\text{C}_{20}\text{H}_{26}\text{O}_2\text{NS}$  [ $\text{M} + \text{H}^+$ ]: 344.16788, found 344.16780.

**(*E*)-4-Methyl-*N*-(2-(3-phenylprop-1-en-1-yl)phenyl)benzenesulfonamide (1g)**

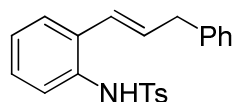

Prepared by the Method A: Phenethyltriphenylphosphonium bromide was synthesized following a previously described procedure.<sup>12</sup> Use toluene as the solvent, 2-nitrobenzaldehyde (755.6 mg, 5.0 mmol, 1.0 equiv) and *n*-BuLi (2.5 M) in hexanes as the base in step 1.<sup>11</sup>

**Step 1:** 487.9 mg, 41% yield and a light yellow oil. Column chromatography: petroleum ether as the eluent.

**Step 2:** 281.3 mg, 77% yield and a light yellow oil. Column chromatography: petroleum ether : EtOAc = 100:1→70 : 1, v/v.

**Step 3:** 2-(3-Phenylprop-1-en-1-yl)aniline (209.3 mg, 1.0 mmol, 1.0 equiv) to give the product as a white solid (274.1 mg, 75% yield). Column chromatography: petroleum ether : EtOAc = 100:1→20:1, v/v.

$^1\text{H}$  NMR (400 MHz,  $\text{CDCl}_3$ )  $\delta$  7.64 (d,  $J$  = 8.3 Hz, 2H), 7.57 (d,  $J$  = 8.1 Hz, 1H), 7.30 – 7.17 (m, 6H), 7.08 (dd,  $J$  = 6.2, 3.5 Hz, 4H), 6.59 (s, 1H), 6.08 – 5.95 (m, 2H), 3.24 (d,  $J$  = 6.7 Hz, 2H), 2.36 (s, 3H).

$^{13}\text{C}$  NMR (101 MHz,  $\text{CDCl}_3$ )  $\delta$  144.0, 139.7, 136.7, 135.7, 134.5, 129.8, 129.8, 128.8, 128.7, 128.5, 128.3, 127.3, 126.4, 124.9, 124.7, 121.4, 34.5, 21.7.

HR-ESI-MS  $m/z$  calcd.  $C_{22}H_{22}O_2NS$   $[M + H^+]$ : 364.13658, found 364.13673.

**(*E*)-4-Methyl-*N*-(2-(4-phenylbut-1-en-1-yl)phenyl)benzenesulfonamide (1h)**

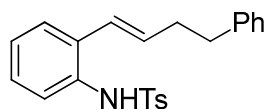

Prepared by the Method A: Triphenyl(3-phenylpropyl)phosphonium bromide was synthesized following a previously described procedure.<sup>12</sup> Use toluene as the solvent, 2-nitrobenzaldehyde (755.6 mg, 5.0 mmol, 1.0 equiv) and *n*-BuLi (2.5 M) in hexanes as the base in step 1.<sup>11</sup>

**Step 1:** 550.0 mg, 43% yield and a light yellow oil. Column chromatography: petroleum ether as the eluent.

**Step 2:** 316.1 mg, 85% yield and a light yellow oil. Column chromatography: petroleum ether : EtOAc = 100:1 → 70 : 1, v/v.

**Step 3:** 2-(4-Phenylbut-1-en-1-yl)aniline (223.31 mg, 1.0 mmol, 1.0 equiv) to give the product as a white solid (290.9 mg, 77% yield). Column chromatography: petroleum ether : EtOAc = 100:1 → 20:1, v/v.

$^1H$  NMR (400 MHz,  $CDCl_3$ )  $\delta$  7.60 (d,  $J$  = 8.3 Hz, 2H), 7.51 (d,  $J$  = 8.1 Hz, 1H), 7.27 – 7.16 (m, 6H), 7.07 – 6.99 (m, 3H), 6.85 (d,  $J$  = 7.4 Hz, 1H), 6.39 (s, 1H), 5.89 – 5.77 (m, 2H), 2.61 (t,  $J$  = 7.6 Hz, 2H), 2.32 (s, 3H), 2.21 (q,  $J$  = 7.1 Hz, 2H).

$^{13}C$  NMR (101 MHz,  $CDCl_3$ )  $\delta$  144.0, 141.1, 136.7, 136.5, 134.3, 129.8, 129.7, 129.2, 128.5, 128.3, 127.2, 126.2, 124.8, 124.6, 121.3, 35.5, 30.2, 21.6.

HR-ESI-MS  $m/z$  calcd.  $C_{23}H_{24}O_2NS$   $[M + H^+]$ : 378.15223, found 378.15215.

**(*E*)-4-(2-(4-Methylphenylsulfonamido)phenyl)but-3-en-1-yl benzoate (1i)**

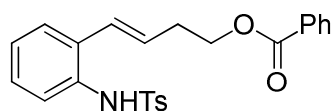

Prepared by the Method B: But-3-en-1-yl benzoate was synthesized following a previously described procedure.<sup>12</sup>

<sup>12</sup> Lipshutz, B. H.; Ghorai, S.; Leong, W. W. Y. *J. Org. Chem.* **2009**, *74*, 2854-2857.

**Step 1:** 2-Bromoaniline (275.2 mg, 1.6 mmol, 1.0 equiv) to give the product as a yellow oil (153.1 mg, 36% yield). Column chromatography: petroleum ether : EtOAc = 50:1→15 : 1, v/v.

**Step 2:** 4-(2-Aminophenyl)but-3-en-1-yl benzoate (153.1 mg, 0.57 mmol, 1.0 equiv) to give the product as a white solid (136.6 mg, 57% yield). Column chromatography: petroleum ether : EtOAc = 40:1→8:1, v/v.

$^1\text{H}$  NMR (400 MHz,  $\text{CDCl}_3$ )  $\delta$  8.04 (d,  $J$  = 7.6 Hz, 2H), 7.61 (d,  $J$  = 8.0 Hz, 2H), 7.55 (t,  $J$  = 7.3 Hz, 1H), 7.44 (t,  $J$  = 7.6 Hz, 2H), 7.30 (d,  $J$  = 7.5 Hz, 2H), 7.24 – 7.06 (m, 4H), 6.83 (s, 1H), 6.36 (d,  $J$  = 15.7 Hz, 1H), 6.03 – 5.90 (m, 1H), 4.35 (t,  $J$  = 6.5 Hz, 2H), 2.55 (dd,  $J$  = 12.9, 6.4 Hz, 2H), 2.35 (s, 3H).

$^{13}\text{C}$  NMR (101 MHz,  $\text{CDCl}_3$ )  $\delta$  166.7, 143.9, 136.6, 133.1, 133.1, 132.5, 130.2, 130.1, 129.7, 129.7, 128.5, 128.2, 127.3, 127.2, 127.0, 126.6, 125.2, 64.0, 32.7, 21.6.

HR-ESI-MS  $m/z$  calcd.  $\text{C}_{24}\text{H}_{24}\text{O}_4\text{NS}$  [ $\text{M} + \text{H}^+$ ]: 422.14206, found 422.14213.

**(*E*)-*N*-(2-(5-Cyanopent-1-en-1-yl)phenyl)-4-methylbenzenesulfonamide (1j)**

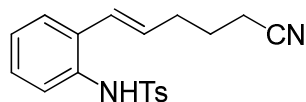

Prepared by the Method B: 2-Bromoaniline (516.1 mg, 3.0 mmol, 1.0 equiv), hex-5-enenitrile (342.5 mg, 3.6 mmol, 1.2 equiv).

**Step 1:** 330.0 mg, 59% yield and a light yellow oil. Column chromatography: petroleum ether : EtOAc = 100:1→7 : 1, v/v.

**Step 2:** 6-(2-Aminophenyl)hex-5-enenitrile (186.3 mg, 1.0 mmol, 1.0 equiv) to give the product as a light yellow oil (295.5 mg, 88% yield). Column chromatography: petroleum ether : EtOAc = 100:1→5:1, v/v.

$^1\text{H}$  NMR (400 MHz,  $\text{CDCl}_3$ ) (*Z* and *E*)  $\delta$  7.62 (d,  $J$  = 8.3 Hz, 3H), 7.35 – 7.20 (m, 6H), 7.19 – 7.07 (m, 3H), 7.02 (d,  $J$  = 9.3 Hz, 1H), 6.79 (d,  $J$  = 5.8 Hz, 1H), 6.34 (d,  $J$  = 15.7 Hz, 1H), 5.93 – 5.86 (m, 1H), 5.66 – 5.49 (m, 1H), 5.45 – 5.25 (m, 1H), 3.09 (d,  $J$  = 6.0 Hz, 1H), 2.38 (dd,  $J$  = 7.9, 4.3 Hz, 5H), 2.33 (t,  $J$  = 7.1 Hz, 3H), 2.25 (q,  $J$  = 7.1 Hz, 2H), 1.90 – 1.86 (m, 1H), 1.75 (p,  $J$  = 7.2 Hz, 2H).

$^{13}\text{C}$  NMR (101 MHz,  $\text{CDCl}_3$ )  $\delta$  143.9, 136.8, 136.6, 134.6, 132.9, 132.7, 131.8, 131.0, 130.4, 129.7, 129.7, 128.2, 128.1, 127.6, 127.3, 127.2, 126.9, 126.7, 126.4, 125.5, 125.1, 119.8, 119.4, 34.5, 31.9, 28.3, 24.7, 21.6, 17.4, 16.5.

HR-ESI-MS  $m/z$  calcd.  $\text{C}_{19}\text{H}_{21}\text{O}_2\text{N}_2\text{S}$   $[\text{M} + \text{H}^+]$ : 341.13183, found 341.13166.

**(*E*)-4-Methyl-N-(2-styrylphenyl)benzenesulfonamide (1k)**

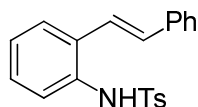

Prepared by the Method A: Benzyltriphenylphosphonium bromide was synthesized following a previously described procedure.<sup>12</sup> Use toluene as the solvent, 2-nitrobenzaldehyde (755.6 mg, 5.0 mmol, 1.0 equiv) and *n*-BuLi (2.5 M) in hexanes as the base in step 1.<sup>11</sup>

**Step 1:** 820.0 mg, 73% yield and a white solid. Column chromatography: petroleum ether : EtOAc = 100:1, v/v.

**Step 2:** 613.2 mg, 86% yield and a white solid. Column chromatography: petroleum ether : EtOAc = 100:1→50 : 1, v/v.

**Step 3:** 910.0 mg, 83% yield and a white solid. Column chromatography: petroleum ether : EtOAc = 100:1→20:1, v/v. The NMR data match the reported in the literature.<sup>2</sup>

$^1\text{H}$  NMR (400 MHz,  $\text{CDCl}_3$ )  $\delta$  7.52 (t,  $J$  = 7.5 Hz, 3H), 7.29 – 6.98 (m, 8H), 6.93 (d,  $J$  = 7.2 Hz, 2H), 6.69 – 6.56 (m, 2H), 6.13 (s, 1H), 2.33 (s, 3H).

**(*E*)-4-Methyl-N-(2-(4-methylstyryl)phenyl)benzenesulfonamide (1l)**

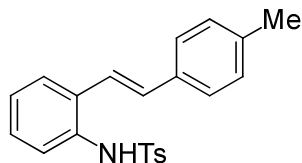

Prepared by the Method B: 2-Bromoaniline (516.1 mg, 3.0 mmol, 1.0 equiv), 1-methyl-4-vinylbenzene (474.8  $\mu\text{L}$ , 3.6 mmol, 1.2 equiv).

**Step 1:** Product 366.4 mg, 58% yield and a white solid. Column chromatography: petroleum ether : EtOAc = 100:1→60 : 1, v/v.

**Step 2:** 2-(4-Methylstyryl)aniline (272.1 mg, 1.3 mmol, 1.0 equiv) to give the product as a white solid (436.6 mg, 92% yield). Column chromatography: petroleum ether : EtOAc = 100:1→5:1, v/v. The NMR data match the reported in the literature.<sup>2</sup>

<sup>1</sup>H NMR (400 MHz, CDCl<sub>3</sub>) δ 7.61 (d, *J* = 8.3 Hz, 2H), 7.49 – 7.43 (m, 1H), 7.40 – 7.35 (m, 1H), 7.25 – 7.17 (m, 4H), 7.13 (dd, *J* = 7.9, 6.0 Hz, 4H), 6.80 – 6.69 (m, 3H), 2.35 (s, 3H), 2.28 (s, 3H).

**(*E*)-*N*-(2-(4-Methoxystyryl)phenyl)-4-methylbenzenesulfonamide (1m)**

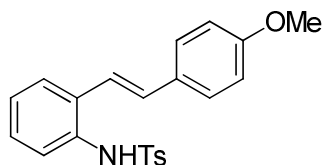

Prepared by the Method B: 2-Bromoaniline (602.1 mg, 3.5 mmol, 1.0 equiv), 1-methoxy-4-vinylbenzene (579.2 μL, 4.2 mmol, 1.2 equiv).

**Step 1:** 616.0 mg, 81% yield and a white solid. Column chromatography: petroleum ether : EtOAc = 100:1→20 : 1, v/v.

**Step 2:** 2-(4-Methoxystyryl)aniline (337.9 mg, 1.5 mmol, 1.0 equiv) to give the product as a white solid (498.5 mg, 88% yield). Column chromatography: petroleum ether : petroleum ether : EtOAc = 100:1→5:1, v/v. The NMR data match the reported in the literature.<sup>2</sup>

<sup>1</sup>H NMR (400 MHz, CDCl<sub>3</sub>) δ 7.61 (d, *J* = 8.2 Hz, 2H), 7.45 (dd, *J* = 6.0, 3.3 Hz, 1H), 7.35 (dd, *J* = 6.1, 3.1 Hz, 1H), 7.29 – 7.23 (m, 2H), 7.22 – 7.17 (m, 2H), 7.13 (d, *J* = 8.1 Hz, 2H), 6.84 (d, *J* = 8.8 Hz, 3H), 6.71 (s, 2H), 3.82 (s, 3H), 2.27 (s, 3H).

**(*E*)-*N*-(2-(4-Chlorostyryl)phenyl)-4-methylbenzenesulfonamide (1n)**

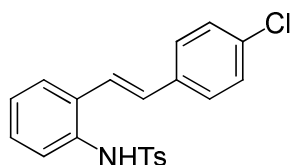

Prepared by the Method B: 2-Bromoaniline (516.1 mg, 3.0 mmol, 1.0 equiv), 1-chloro-4-vinylbenzene (431.6 μL, 3.6 mmol, 1.2 equiv).

**Step 1:** 481.0 mg, 70% yield and a white solid. Column chromatography: petroleum ether : EtOAc = 100:1→50:1, v/v.

**Step 2:** 2-(4-Chlorostyryl)aniline (344.6 mg, 1.5 mg, 1.0 equiv) to give the product as white solid (67% yield). Column chromatography: petroleum ether : EtOAc = 100:1→5:1, v/v. The NMR data match the reported in the literature.<sup>2</sup>

<sup>1</sup>H NMR (400 MHz, CDCl<sub>3</sub>) δ 7.61 (d, *J* = 8.3 Hz, 2H), 7.49 (dd, *J* = 6.0, 3.3 Hz, 1H), 7.34 – 7.20 (m, 8H), 7.16 (d, *J* = 8.1 Hz, 2H), 6.94 – 6.60 (m, 3H), 2.30 (s, 3H).

**(*E*)-*N*-(2-(4-Fluorostyryl)phenyl)-4-methylbenzenesulfonamide (1o)**

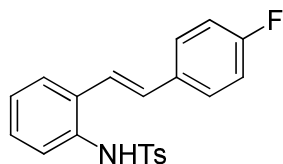

Prepared by the Method B: 2-Bromoaniline (516.1 mg, 3.0 mmol, 1.0 equiv), 1-fluoro-4-vinylbenzene (429.0 μL, 3.6 mmol, 1.2 equiv).

**Step 1:** 537.6 mg, 84% yield and a white solid. Column chromatography: petroleum ether : EtOAc = 100:1→50:1, v/v.

**Step 2:** 2-(4-Fluorostyryl)aniline (344.6 mg, 1.5 mg, 1.0 equiv) to give the product as a white solid (494.3 mg, 90% yield). Column chromatography: petroleum ether : EtOAc = 100:1→5:1, v/v. The NMR data match the reported in the literature.<sup>13</sup>

<sup>1</sup>H NMR (400 MHz, CDCl<sub>3</sub>) δ 7.66 – 7.56 (m, 2H), 7.51 – 7.43 (m, 1H), 7.34 – 7.27 (m, 3H), 7.24 – 7.18 (m, 2H), 7.15 (d, *J* = 8.0 Hz, 2H), 7.04 – 6.96 (m, 2H), 6.87 – 6.70 (m, 3H), 2.29 (s, 3H).

<sup>19</sup>F NMR (377 MHz, CDCl<sub>3</sub>) δ -113.42.

**(*E*)-4-Methyl-*N*-(2-(4-nitrostyryl)phenyl)benzenesulfonamide (1p)**

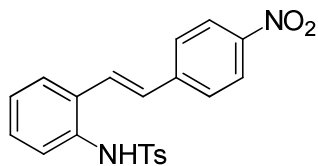

<sup>13</sup> Li, Y. L.; Li, J.; Ma, A. L.; Huang, Y. N.; Deng, J. *J. Org. Chem.* **2015**, *80*, 3841-3851.



Prepared by the Method B: 2-Bromoaniline (688.1 mg, 4.0 mmol, 1.0 equiv), 1-nitro-4-vinylbenzene (615.6  $\mu$ L, 4.8 mmol, 1.2 equiv).

**Step 1:** 541.5 mg, 56% yield and a red solid. Column chromatography: petroleum ether : EtOAc = 100:1  $\rightarrow$  10:1, v/v.

**Step 2:** 2-(4-Nitrostyryl)aniline (288.3 mg, 1.2 mmol, 1.0 equiv) to give the product as a yellow solid (415.6 mg, 88% yield). Column chromatography: petroleum ether : petroleum ether : EtOAc = 100:1  $\rightarrow$  5:1, v/v. The NMR data match the reported in the literature.<sup>2</sup>

<sup>1</sup>H NMR (400 MHz, CDCl<sub>3</sub>)  $\delta$  8.15 (d,  $J$  = 8.6 Hz, 2H), 7.63 (d,  $J$  = 8.2 Hz, 2H), 7.60 – 7.56 (m, 1H), 7.49 (d,  $J$  = 8.7 Hz, 2H), 7.30 – 7.22 (m, 4H), 7.18 (d,  $J$  = 8.1 Hz, 2H), 6.96 – 6.84 (m, 2H), 2.31 (s, 3H).

**(E)-4-Methyl-N-(4-methyl-2-styrylphenyl)benzenesulfonamide (1q)**

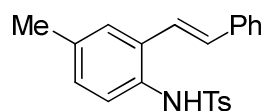

Prepared by the Method B: 2-Bromo-4-methylaniline (558.2 mg, 3.0 mmol, 1.0 equiv), styrene (413.8  $\mu$ L, 3.6 mmol, 1.2 equiv).

**Step 1:** 535.3 mg, 85% yield and a light yellow solid. Column chromatography: petroleum ether : EtOAc = 100:1  $\rightarrow$  30:1, v/v.

**Step 2:** 787.7 mg, 85% yield and a white solid. Column chromatography: petroleum ether : EtOAc = 100:1  $\rightarrow$  10:1, v/v. The NMR data match the reported in the literature.<sup>2</sup>

<sup>1</sup>H NMR (400 MHz, CDCl<sub>3</sub>)  $\delta$  7.59 (d,  $J$  = 8.2 Hz, 2H), 7.34 – 7.23 (m, 5H), 7.22 – 7.13 (m, 3H), 7.02 (d,  $J$  = 8.2 Hz, 2H), 7.00 – 6.88 (m, 2H), 6.70 (d,  $J$  = 16.1 Hz, 1H), 2.28 (s, 3H), 2.17 (s, 3H).

<sup>13</sup>C NMR (101 MHz, CDCl<sub>3</sub>)  $\delta$  143.7, 137.1, 136.9, 136.4, 133.7, 131.0, 130.6, 129.6, 129.08, 128.5, 127.8, 127.1, 126.8, 126.7, 126.6, 123.0, 21.4, 21.1.

**(E)-4-Methyl-N-(5-methyl-2-styrylphenyl)benzenesulfonamide (1r)**

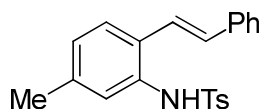

Prepared by the Method B: 2-Bromo-5-methylaniline (558.2 mg, 3.0 mmol, 1.0 equiv), styrene (413.8  $\mu$ L, 3.6 mmol, 1.2 equiv).

**Step 1:** 476.0 mg, 76% yield and a light yellow solid. Column chromatography: petroleum ether : EtOAc = 100:1 $\rightarrow$ 30:1, v/v.

**Step 2:** 641.8 mg, 80% yield and a white solid. Column chromatography: petroleum ether : EtOAc = 100:1 $\rightarrow$ 10:1, v/v. The NMR data match the reported in the literature.<sup>2</sup>

<sup>1</sup>H NMR (400 MHz, CDCl<sub>3</sub>)  $\delta$  7.60 (d,  $J$  = 8.2 Hz, 2H), 7.37 (d,  $J$  = 8.0 Hz, 1H), 7.33 – 7.18 (m, 6H), 7.12 (d,  $J$  = 8.0 Hz, 2H), 7.03 (d,  $J$  = 8.0 Hz, 1H), 6.85 – 6.62 (m, 3H), 2.32 (s, 3H), 2.25 (s, 3H).

<sup>13</sup>C NMR (101 MHz, CDCl<sub>3</sub>)  $\delta$  143.9, 138.7, 137.0, 136.6, 133.1, 131.1, 130.5, 129.7, 128.7, 128.2, 127.9, 127.8, 127.2, 126.7, 126.3, 122.6, 77.5, 77.2, 76.8, 21.6, 21.3.

*(E)*-N-(4-Chloro-2-styrylphenyl)-4-methylbenzenesulfonamide (**1s**)

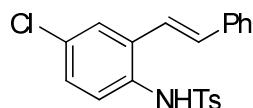

Prepared by the Method B: 2-Bromo-4-chloroaniline (619.4 mg, 3.0 mmol, 1.0 equiv), styrene (413.8  $\mu$ L, 3.6 mmol, 1.2 equiv).

**Step 1:** 573.0 mg, 83% yield and a light yellow solid. Column chromatography: petroleum ether : EtOAc = 100:1 $\rightarrow$ 30:1, v/v.

**Step 2:** 697.5 mg, 73% yield and a white solid. Column chromatography: petroleum ether : EtOAc = 100:1 $\rightarrow$ 10:1, v/v. The NMR data match the reported in the literature.<sup>2</sup>

<sup>1</sup>H NMR (400 MHz, CDCl<sub>3</sub>)  $\delta$  7.60 (d,  $J$  = 8.2 Hz, 2H), 7.44 (d,  $J$  = 2.3 Hz, 1H), 7.34 – 7.23 (m, 6H), 7.16 (dd,  $J$  = 8.6, 2.3 Hz, 1H), 7.13 – 7.07 (m, 3H), 6.82 (d,  $J$  = 16.1 Hz, 1H), 6.71 (d,  $J$  = 16.1 Hz, 1H), 2.24 (s, 3H).

<sup>13</sup>C NMR (101 MHz, CDCl<sub>3</sub>)  $\delta$  144.2, 136.4, 136.2, 135.3, 133.0, 133.0, 131.8, 129.8, 129.8, 128.7, 128.6, 128.5, 128.2, 127.2, 127.0, 126.2, 121.5, 21.6.

**(E)-N-(5-Chloro-2-styrylphenyl)-4-methylbenzenesulfonamide (1t)**

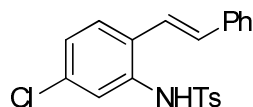

Prepared by the Method B: 2-Bromo-5-chloroaniline (619.4 mg, 3.0 mmol, 1.0 equiv), styrene (413.8  $\mu$ L, 3.6 mmol, 1.2 equiv).

**Step 1:** 566.3 mg, 82% yield and a light yellow solid. Column chromatography: petroleum ether : EtOAc = 100:1 $\rightarrow$ 30:1, v/v.

**Step 2:** 641.8 mg, 68% yield and a white solid. Column chromatography: petroleum ether : EtOAc = 100:1 $\rightarrow$ 10:1, v/v. The NMR data match the reported in the literature.<sup>2</sup>

<sup>1</sup>H NMR (400 MHz, CDCl<sub>3</sub>)  $\delta$  7.64 (d,  $J$  = 8.2 Hz, 2H), 7.41 (d,  $J$  = 1.9 Hz, 1H), 7.39 (d,  $J$  = 8.4 Hz, 1H), 7.31 (d,  $J$  = 4.5 Hz, 4H), 7.27 (dd,  $J$  = 7.0, 3.5 Hz, 1H), 7.18 – 7.09 (m, 4H), 6.81 (d,  $J$  = 16.1 Hz, 1H), 6.72 (d,  $J$  = 16.1 Hz, 1H), 2.27 (s, 3H).

<sup>13</sup>C NMR (101 MHz, CDCl<sub>3</sub>)  $\delta$  144.3, 136.5, 136.2, 134.3, 133.6, 132.7, 131.4, 129.9, 128.7, 128.4, 127.5, 127.2, 127.1, 126.8, 126.2, 121.5, 21.6.

**(E)-4-Methyl-N-(2-styryl-4-(trifluoromethyl)phenyl)benzenesulfonamide (1u)**

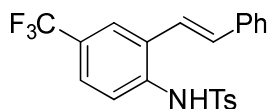

Prepared by the Method B: 2-Bromo-4-(trifluoromethyl)aniline (720.1 mg, 3.0 mmol, 1.0 equiv), styrene (413.8  $\mu$ L, 3.6 mmol, 1.2 equiv).

**Step 1:** 591.0 mg, 75% yield and a light yellow solid. Column chromatography: petroleum ether : EtOAc = 100:1 $\rightarrow$ 30:1, v/v.

**Step 2:** 704.4 mg, 75% yield and a white solid. Column chromatography: petroleum ether : EtOAc = 100:1 $\rightarrow$ 10:1, v/v. The NMR data match the reported in the literature.<sup>2</sup>

<sup>1</sup>H NMR (400 MHz, CDCl<sub>3</sub>)  $\delta$  7.72 – 7.64 (m, 3H), 7.53 (d,  $J$  = 8.5 Hz, 1H), 7.45 (dd,  $J$  = 8.5, 1.1 Hz, 1H), 7.38 (d,  $J$  = 7.5 Hz, 2H), 7.35 – 7.26 (m, 4H), 7.17 (d,  $J$  = 8.1 Hz, 2H), 6.91 (d,  $J$  = 16.1 Hz, 1H), 6.82 (d,  $J$  = 16.1 Hz, 1H), 2.30 (s, 3H).

$^{13}\text{C}$  NMR (101 MHz,  $\text{CDCl}_3$ )  $\delta$  144.6, 136.6, 136.2, 136.2, 134.3, 132.4, 130.0, 128.8, 128.7, 128.5, 128.2, 127.2, 127.0, 125.3, 125.1, 125.1, 124.8, 124.0, 123.9, 122.6, 121.2, 77.5, 77.2, 76.8, 21.6.

$^{19}\text{F}$  NMR (377 MHz,  $\text{CDCl}_3$ )  $\delta$  -62.39.

**(*E*)-*N*-(4-Fluoro-2-styrylphenyl)-4-methylbenzenesulfonamide (1v)**

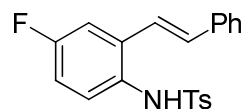

Prepared by the Method B: 2-Bromo-4-fluoroaniline (570.0 mg, 3.0 mmol, 1.0 equiv), styrene (413.8  $\mu\text{L}$ , 3.6 mmol, 1.2 equiv).

**Step 1:** 266.2 mg, 42% yield and a light yellow solid. Column chromatography: petroleum ether : EtOAc = 100:1 $\rightarrow$ 30:1, v/v.

**Step 2:** 366.0 mg, 75% yield and a white solid. Column chromatography: petroleum ether : EtOAc = 100:1 $\rightarrow$ 10:1, v/v. The NMR data match the reported in the literature.<sup>13</sup>

$^1\text{H}$  NMR (400 MHz,  $\text{CDCl}_3$ )  $\delta$  7.58 (d,  $J$  = 8.2 Hz, 2H), 7.28 (ddd,  $J$  = 8.7, 7.7, 4.0 Hz, 6H), 7.19 (dd,  $J$  = 9.7, 2.9 Hz, 1H), 7.10 (d,  $J$  = 8.2 Hz, 2H), 6.97 – 6.88 (m, 2H), 6.84 (d,  $J$  = 16.1 Hz, 1H), 6.72 (d,  $J$  = 16.1 Hz, 1H), 2.23 (s, 3H).

$^{13}\text{C}$  NMR (101 MHz,  $\text{CDCl}_3$ )  $\delta$  163.0, 160.5, 144.1, 136.6, 136.5, 136.4, 136.2, 132.6, 130.3, 130.2, 129.8, 129.1, 129.0, 128.8, 128.7, 128.4, 127.3, 127.0, 122.0, 122.0, 115.4, 115.2, 112.6, 112.4, 21.5.

$^{19}\text{F}$  NMR (377 MHz,  $\text{CDCl}_3$ )  $\delta$  -113.83.

**(*E*)-4-Methyl-*N*-(2-(2-phenylprop-1-en-1-yl)phenyl)benzenesulfonamide (3)**

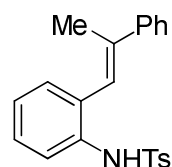

Prepared by the Method A: Triphenyl(1-phenylethyl)phosphonium bromide was synthesized following a previously described procedure.<sup>12</sup> Use toluene as the solvent

and 2-nitrobenzaldehyde (755.6 mg, 5.0 mmol, 1.0 equiv) and *n*-BuLi (2.5 M) in hexanes as the base in step 1.<sup>11</sup>

**Step 1:** 784.3 mg, 66% yield and a light yellow solid. Column chromatography: petroleum ether.

**Step 2:** 496.4 mg, 74% yield and a white solid. Column chromatography: petroleum ether : EtOAc = 100:1→70:1, v/v.

**Step 3:** 514.9 mg, 94% yield and a white solid. Column chromatography: petroleum ether : EtOAc = 100:1→20:1, v/v. The NMR data match the reported in the literature.<sup>2</sup>

<sup>1</sup>H NMR (400 MHz, CDCl<sub>3</sub>) δ 7.59 (dd, *J* = 7.8, 5.8 Hz, 3H), 7.36 (dd, *J* = 5.8, 4.4 Hz, 4H), 7.35 – 7.29 (m, 1H), 7.28 – 7.23 (m, 1H), 7.18 (d, *J* = 8.1 Hz, 2H), 7.15 – 7.07 (m, 2H), 6.59 (s, 1H), 6.21 (s, 1H), 2.36 (s, 3H), 1.88 (d, *J* = 1.2 Hz, 3H).

### 3. General Procedure for the Synthesis of Indoles via C–H Amination

**Method C:** To a solution of substrate **1** or **3** (0.1 mmol, 1.05 equiv) in dioxane (1.0 mL) were added NFSI (0.1 mmol, 1.0 equiv) and PhSeSePh (10 mol%). The resulting mixture was stirred at 30 °C for 18 h under nitrogen atmosphere. After the reaction was completed, K<sub>2</sub>CO<sub>3</sub> was added to the reaction mixture to eliminate HF. The resulting mixture was stirred at room temperature for 10 minutes, and then concentrated under reduced pressure. The residue was directly purified by flash column chromatography on silica gel to give the corresponding product **2** or **4**.

### 4. Characterization Data for Products

#### 2-Ethyl-1-tosyl-1*H*-indole (**2a**)

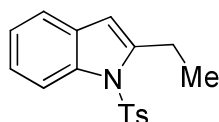

Prepared by the method C. Column chromatography (eluent: petroleum ether : EtOAc = 100:1, v/v) to afford **2a** (23.5 mg, 79 % yield) as a light yellow oil.

$^1\text{H}$  NMR (400 MHz,  $\text{CDCl}_3$ )  $\delta$  8.17 (d,  $J = 8.3$  Hz, 1H), 7.62 (d,  $J = 8.3$  Hz, 2H), 7.41 (d,  $J = 7.8$  Hz, 1H), 7.27 – 7.13 (m, 4H), 6.38 (s, 1H), 3.02 (q,  $J = 7.3$  Hz, 2H), 2.31 (s, 3H), 1.33 (t,  $J = 7.4$  Hz, 3H).

$^{13}\text{C}$  NMR (101 MHz,  $\text{CDCl}_3$ )  $\delta$  144.7, 144.0, 137.4, 136.4, 129.9, 126.4, 123.9, 123.5, 120.2, 114.8, 107.8, 22.5, 21.7, 13.1.

HR-ESI-MS  $m/z$  calcd.  $\text{C}_{17}\text{H}_{18}\text{O}_2\text{NS}$  [ $\text{M} + \text{H}^+$ ]: 300.10528, found 300.10532.

### 2-Ethyl-1-((4-nitrophenyl)sulfonyl)-1*H*-indole (**2b**)

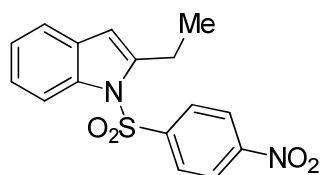

Prepared by the method C. Column chromatography (eluent: petroleum ether : EtOAc = 100:1, v/v) to afford **2b** (20.1 mg, 61 % yield) as a light yellow solid.

$^1\text{H}$  NMR (400 MHz,  $\text{CDCl}_3$ )  $\delta$  8.25 – 8.19 (m, 2H), 8.13 (d,  $J = 8.3$  Hz, 1H), 7.91 – 7.85 (m, 2H), 7.47 – 7.40 (m, 1H), 7.26 (dq,  $J = 14.9, 7.3, 1.3$  Hz, 2H), 6.45 (d,  $J = 0.7$  Hz, 1H), 3.00 (qd,  $J = 7.3, 1.2$  Hz, 2H), 1.36 (t,  $J = 7.3$  Hz, 3H).

$^{13}\text{C}$  NMR (101 MHz,  $\text{CDCl}_3$ )  $\delta$  150.6, 144.3, 143.8, 137.2, 130.1, 127.7, 124.6, 124.4, 120.7, 114.8, 109.4, 22.7, 13.1.

HR-ESI-MS  $m/z$  calcd.  $\text{C}_{16}\text{H}_{13}\text{O}_4\text{N}_2\text{S}$  [ $\text{M} - \text{H}^+$ ]: 329.06015, found 329.06009.

### 2-Ethyl-1-(ethylsulfonyl)-1*H*-indole (**2c**)

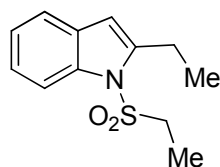

Prepared by the method C. Column chromatography (eluent: petroleum ether : EtOAc = 100:1, v/v) to afford **2c** (12.9 mg, 54 % yield) as a light yellow oil.

$^1\text{H}$  NMR (400 MHz,  $\text{CDCl}_3$ )  $\delta$  7.98 (dd,  $J = 6.2, 2.6$  Hz, 1H), 7.49 (dd,  $J = 5.8, 3.1$  Hz, 1H), 7.29 – 7.19 (m, 2H), 6.45 (s, 1H), 3.23 (q,  $J = 7.4$  Hz, 2H), 3.00 (q,  $J = 7.3$  Hz, 2H), 1.37 (t,  $J = 7.4$  Hz, 3H), 1.19 (t,  $J = 7.4$  Hz, 3H).

$^{13}\text{C}$  NMR (101 MHz,  $\text{CDCl}_3$ )  $\delta$  144.6, 137.2, 129.7, 124.0, 123.5, 120.4, 114.2, 107.0, 22.37, 13.2, 7.9.

HR-ESI-MS  $m/z$  calcd.  $\text{C}_{12}\text{H}_{16}\text{O}_2\text{NS}$   $[\text{M} - \text{H}^+]$ : 238.08963, found 238.08975.

### 2-Propyl-1-tosyl-1*H*-indole (2e)

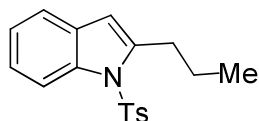

Prepared by the method C. Column chromatography (eluent: petroleum ether : EtOAc = 100:1, v/v) to afford **2e** (22.0 mg, 70 % yield) as a white solid.

$^1\text{H}$  NMR (400 MHz,  $\text{CDCl}_3$ )  $\delta$  8.16 (d,  $J = 8.1$  Hz, 1H), 7.61 (d,  $J = 8.3$  Hz, 2H), 7.40 (d,  $J = 7.7$  Hz, 1H), 7.31 – 7.08 (m, 4H), 6.37 (s, 1H), 2.96 (t,  $J = 7.5$  Hz, 2H), 2.31 (s, 3H), 1.82 – 1.73 (m, 2H), 1.02 (t,  $J = 7.3$  Hz, 3H).

$^{13}\text{C}$  NMR (101 MHz,  $\text{CDCl}_3$ )  $\delta$  144.7, 142.4, 137.3, 136.3, 130.0, 129.9, 126.4, 123.9, 123.56, 120.2, 114.9, 108.8, 31.2, 22.3, 21.7, 14.1.

HR-ESI-MS  $m/z$  calcd.  $\text{C}_{18}\text{H}_{20}\text{O}_2\text{NS}$   $[\text{M} - \text{H}^+]$ : 314.12093, found 314.12099.

### 2-Pentyl-1-tosyl-1*H*-indole (2f)

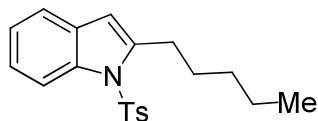

Prepared by the method C. Column chromatography (eluent: petroleum ether : EtOAc = 100:1, v/v) to afford **2f** (25.8 mg, 76 % yield) as a light yellow oil. The NMR data match the reported in the literature data.<sup>14</sup>

$^1\text{H}$  NMR (400 MHz,  $\text{CDCl}_3$ )  $\delta$  8.16 (d,  $J = 8.2$  Hz, 1H), 7.61 (d,  $J = 8.3$  Hz, 2H), 7.43 – 7.35 (m, 1H), 7.28 – 7.13 (m, 4H), 6.37 (s, 1H), 2.97 (t,  $J = 7.6$  Hz, 2H), 2.31 (s, 3H), 1.81 – 1.66 (m, 2H), 1.47 – 1.30 (m, 4H), 0.91 (t,  $J = 7.0$  Hz, 3H).

<sup>14</sup> Swamy, N. K.; Yazici, A.; Pyne, G. S. *J. Org. Chem.* **2010**, 75, 3412-3419.

$^{13}\text{C}$  NMR (101 MHz,  $\text{CDCl}_3$ )  $\delta$  144.7, 142.7, 137.3, 136.4, 130.0, 129.9, 126.4, 123.9, 123.55, 120.1, 114.9, 108.7, 31.7, 29.1, 28.7, 22.6, 21.7, 14.2.

### 2-Benzyl-1-tosyl-1*H*-indole (2g)

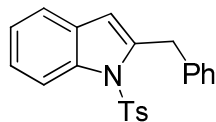

Prepared by the method C. Column chromatography (eluent: petroleum ether : EtOAc = 100:1, v/v) to afford **2g** (21.6 mg, 60 % yield) as a white solid.

$^1\text{H}$  NMR (400 MHz,  $\text{CDCl}_3$ )  $\delta$  8.15 (d,  $J$  = 8.3 Hz, 1H), 7.53 (d,  $J$  = 8.4 Hz, 2H), 7.35 (d,  $J$  = 7.3 Hz, 1H), 7.31 – 7.16 (m, 7H), 7.13 (d,  $J$  = 8.1 Hz, 2H), 6.10 (s, 1H), 4.35 (s, 2H), 2.32 (s, 3H).

$^{13}\text{C}$  NMR (101 MHz,  $\text{CDCl}_3$ )  $\delta$  144.8, 141.1, 138.1, 137.3, 136.2, 129.9, 129.5, 128.6, 126.8, 126.5, 124.2, 123.6, 120.4, 114.8, 111.0, 35.4, 21.7.

HR-ESI-MS  $m/z$  calcd.  $\text{C}_{22}\text{H}_{20}\text{O}_2\text{NS}$  [ $\text{M} + \text{H}^+$ ]: 362.12093, found 362.12101.

### 2-Phenethyl-1-tosyl-1*H*-indole (2h)

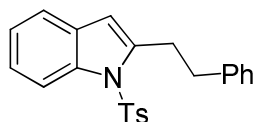

Prepared by the method C. Column chromatography (eluent: petroleum ether : EtOAc = 100:1, v/v) to afford **2h** (31.5 mg, 84 % yield) as a white solid.

$^1\text{H}$  NMR (400 MHz,  $\text{CDCl}_3$ )  $\delta$  8.19 (d,  $J$  = 8.2 Hz, 1H), 7.60 (d,  $J$  = 8.3 Hz, 2H), 7.39 (d,  $J$  = 7.4 Hz, 1H), 7.33 – 7.18 (m, 7H), 7.14 (d,  $J$  = 8.1 Hz, 2H), 6.38 (s, 1H), 3.39 – 3.21 (m, 2H), 3.14 – 2.98 (m, 2H), 2.30 (s, 3H).

$^{13}\text{C}$  NMR (101 MHz,  $\text{CDCl}_3$ )  $\delta$  144.8, 141.5, 141.3, 137.3, 136.2, 129.9, 129.9, 128.6, 128.56, 126.4, 126.3, 124.1, 123.7, 120.3, 115.0, 109.5, 35.7, 31.2, 21.7.

HR-ESI-MS  $m/z$  calcd.  $\text{C}_{23}\text{H}_{22}\text{O}_2\text{NS}$  [ $\text{M} + \text{H}^+$ ]: 376.13658, found 376.13648.

### 2-(1-Tosyl-1*H*-indol-2-yl)ethyl benzoate (2i)



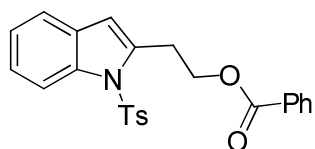

Prepared by the method C. Column chromatography (eluent: petroleum ether : EtOAc = 20:1, v/v) to afford **2i** (26.9 mg, 64 % yield) as a white solid.

$^1\text{H}$  NMR (400 MHz,  $\text{CDCl}_3$ )  $\delta$  8.18 (d,  $J = 8.3$  Hz, 1H), 8.00 (d,  $J = 7.4$  Hz, 2H), 7.63 (d,  $J = 8.3$  Hz, 2H), 7.54 (t,  $J = 7.4$  Hz, 1H), 7.41 (t,  $J = 7.7$  Hz, 3H), 7.30 – 7.15 (m, 4H), 6.52 (s, 1H), 4.71 (t,  $J = 6.5$  Hz, 2H), 3.52 (t,  $J = 6.4$  Hz, 2H), 2.31 (s, 3H).

$^{13}\text{C}$  NMR (101 MHz,  $\text{CDCl}_3$ )  $\delta$  166.5, 145.0, 137.6, 137.3, 136.0, 133.1, 130.2, 130.0, 129.7, 128.5, 126.4, 124.4, 123.8, 120.5, 115.0, 110.4, 63.4, 28.9, 21.7.

HR-ESI-MS  $m/z$  calcd.  $\text{C}_{24}\text{H}_{22}\text{O}_4\text{NS}$  [ $\text{M} + \text{H}^+$ ]: 420.12641, found 420.12652.

#### 4-(1-Tosyl-1H-indol-2-yl)butanenitrile (**2j**)

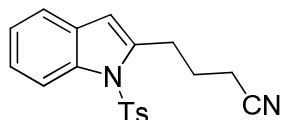

Prepared by the method C. Column chromatography (eluent: petroleum ether : EtOAc = 20:1, v/v) to afford **2j** (10.5 mg, 31 % yield) as a light yellow solid.

$^1\text{H}$  NMR (400 MHz,  $\text{CDCl}_3$ )  $\delta$  8.16 (d,  $J = 8.3$  Hz, 1H), 7.60 (d,  $J = 8.2$  Hz, 2H), 7.42 (d,  $J = 7.6$  Hz, 1H), 7.31 – 7.22 (m, 2H), 7.19 (t,  $J = 6.2$  Hz, 2H), 6.46 (s, 1H), 3.17 (t,  $J = 7.3$  Hz, 2H), 2.41 (t,  $J = 7.0$  Hz, 2H), 2.33 (s, 3H), 2.23 – 2.09 (m, 2H).

$^{13}\text{C}$  NMR (101 MHz,  $\text{CDCl}_3$ )  $\delta$  145.1, 139.2, 137.5, 130.0, 126.3, 124.6, 123.9, 120.5, 115.1, 110.7, 28.2, 25.2, 21.7, 16.7.

HR-ESI-MS  $m/z$  calcd.  $\text{C}_{19}\text{H}_{19}\text{O}_2\text{N}_2\text{S}$  [ $\text{M} + \text{H}^+$ ]: 339.11618, found 339.11609.

#### 2-Phenyl-1-tosyl-1H-indole (**2k**)

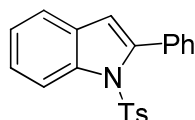

Prepared by the method C. Column chromatography (eluent: petroleum ether : EtOAc = 100:1, v/v) to afford **2k** (31.0 mg, 89 % yield) as a white solid. The NMR data match the reported in the literature.<sup>2</sup>

$^1\text{H}$  NMR (400 MHz,  $\text{CDCl}_3$ )  $\delta$  8.31 (dd,  $J = 8.4, 0.8$  Hz, 1H), 7.52 – 7.47 (m, 2H), 7.45 – 7.39 (m, 4H), 7.35 (ddd,  $J = 8.5, 7.3, 1.4$  Hz, 1H), 7.29 – 7.23 (m, 3H), 7.02 (d,  $J = 8.0$  Hz, 2H), 6.53 (d,  $J = 0.6$  Hz, 1H), 2.26 (s, 3H).

$^{13}\text{C}$  NMR (101 MHz,  $\text{CDCl}_3$ )  $\delta$  144.6, 142.2, 138.4, 134.7, 132.5, 130.7, 130.4, 129.3, 128.8, 127.6, 126.9, 124.9, 124.4, 120.8, 116.8, 113.8, 21.6.

### 2-(*p*-Tolyl)-1-tosyl-1*H*-indole (**2l**)

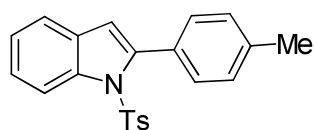

Prepared by the method C. Column chromatography (eluent: petroleum ether : EtOAc = 100:1, v/v) to afford **2l** (35.5 mg, 98 % yield) as a white solid. The NMR data match the reported in the literature.<sup>2</sup>

$^1\text{H}$  NMR (400 MHz,  $\text{CDCl}_3$ )  $\delta$  8.29 (d,  $J = 8.4$  Hz, 1H), 7.40 (dd,  $J = 7.3, 4.7$  Hz, 3H), 7.33 (t,  $J = 7.5$  Hz, 1H), 7.29 – 7.25 (m, 2H), 7.25 – 7.19 (m, 3H), 7.01 (d,  $J = 8.2$  Hz, 2H), 6.49 (s, 1H), 2.43 (s, 3H), 2.25 (s, 3H).

$^{13}\text{C}$  NMR (101 MHz,  $\text{CDCl}_3$ )  $\delta$  144.6, 142.4, 138.7, 138.3, 134.7, 130.8, 130.3, 129.6, 129.26, 128.4, 126.9, 124.7, 124.4, 120.7, 116.8, 113.4, 21.6, 21.6.

### 2-(4-Methoxyphenyl)-1-tosyl-1*H*-indole (**2m**)

### and 3-(4-Methoxyphenyl)-1-tosyl-1*H*-indole (**2m'**)

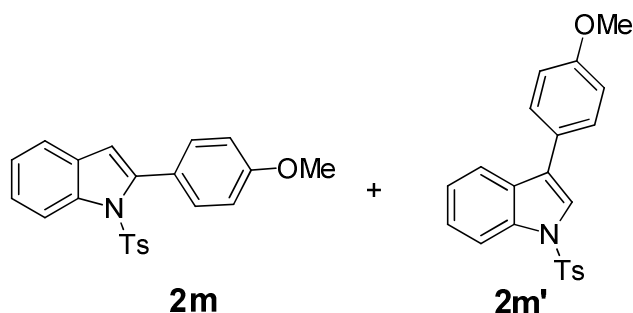

Prepared by the method C. Column chromatography (eluent: petroleum ether : EtOAc = 100:1, v/v) to afford **2m** (36.6 mg, 97 % yield (**2m**, 87%; **2m'**, 10%)) as a white solid. The NMR data match the reported in the literature.<sup>2</sup>

Signals relate to **2m**:  $^1\text{H}$  NMR (400 MHz,  $\text{CDCl}_3$ )  $\delta$  8.30 (d,  $J = 8.4$  Hz, 1H), 7.41 (dd,  $J = 8.8, 2.3$  Hz, 3H), 7.32 (dd,  $J = 11.4, 4.1$  Hz, 1H), 7.25 (d,  $J = 8.5$  Hz, 3H), 7.02 (d,  $J = 8.2$  Hz, 2H), 6.95 (d,  $J = 8.7$  Hz, 2H), 6.47 (s, 1H), 3.87 (s, 3H), 2.31 (s, 1H), 2.26 (s, 3H).

$^{13}\text{C}$  NMR (101 MHz,  $\text{CDCl}_3$ )  $\delta$  160.1, 144.6, 142.1, 138.2, 134.7, 131.7, 130.8, 130.0, 129.3, 129.1, 127.0, 126.9, 124.9, 124.8, 124.6, 124.4, 123.6, 122.4, 120.640, 120.540, 116.8, 114.5, 113.9, 113.1, 113.0, 55.4, 21.6.

HR-ESI-MS  $m/z$  calcd.  $\text{C}_{22}\text{H}_{20}\text{O}_3\text{NS}$   $[\text{M} + \text{H}^+]$ : 378.11584, found 378.11572.

### 2-(4-Chlorophenyl)-1-tosyl-1*H*-indole (**2n**)

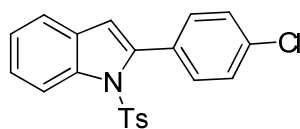

Prepared by the method C. Column chromatography (eluent: petroleum ether : EtOAc = 100:1, v/v) to afford **2n** (37.8 mg, 99 % yield) as a white solid. The NMR data match the reported in the literature.<sup>2</sup>

$^1\text{H}$  NMR (400 MHz,  $\text{CDCl}_3$ )  $\delta$  8.30 (d,  $J = 8.4$  Hz, 1H), 7.44 – 7.34 (m, 6H), 7.28 – 7.23 (m, 3H), 7.03 (d,  $J = 8.3$  Hz, 2H), 6.53 (s, 1H), 2.26 (s, 3H).

$^{13}\text{C}$  NMR (101 MHz,  $\text{CDCl}_3$ )  $\delta$  144.9, 140.9, 138.4, 134.8, 134.5, 131.6, 131.0, 130.5, 130.4, 129.4, 127.9, 127.6, 126.9, 126.8, 125.2, 124.6, 120.9, 116.8, 114.2, 21.6.

### 2-(4-Fluorophenyl)-1-tosyl-1*H*-indole (**2o**)

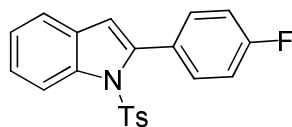

Prepared by the method C. Column chromatography (eluent: petroleum ether : EtOAc = 100:1, v/v) to afford **2o** (36.3 mg, 99 % yield) as a white solid. The NMR data match the reported in the literature.<sup>13</sup>

$^1\text{H}$  NMR (400 MHz,  $\text{CDCl}_3$ )  $\delta$  8.31 (d,  $J = 8.3$  Hz, 1H), 7.50 – 7.40 (m, 3H), 7.35 (t,  $J = 7.8$  Hz, 1H), 7.26 (dd,  $J = 11.4, 3.9$  Hz, 3H), 7.10 (dd,  $J = 8.6, 6.9$  Hz, 2H), 7.03 (d,  $J = 7.4$  Hz, 2H), 6.51 (s, 1H), 2.27 (s, 3H).

$^{13}\text{C}$  NMR (101 MHz,  $\text{CDCl}_3$ )  $\delta$  164.4, 161.9, 144.8, 141.0, 138.3, 134.7, 132.23, 132.2, 130.5, 129.4, 128.5, 128.5, 126.8, 125.0, 124.5, 120.8, 116.7, 114.8, 114.6, 113.8, 21.6.

$^{19}\text{F}$  NMR (377 MHz,  $\text{CDCl}_3$ )  $\delta$  -112.56.

### 2-(4-Nitrophenyl)-1-tosyl-1*H*-indole (2p)

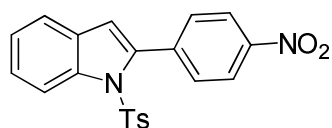

Prepared by the method C. Column chromatography (eluent: petroleum ether : EtOAc = 60:1, v/v) to afford **2p** (38.4 mg, 98 % yield) as a yellow solid. The NMR data match the reported in the literature.<sup>2</sup>

$^1\text{H}$  NMR (400 MHz,  $\text{CDCl}_3$ )  $\delta$  8.29 (t,  $J = 8.8$  Hz, 3H), 7.71 (d,  $J = 8.8$  Hz, 2H), 7.47 (d,  $J = 7.7$  Hz, 1H), 7.44 – 7.38 (m, 1H), 7.32 – 7.22 (m, 3H), 7.05 (d,  $J = 8.1$  Hz, 2H), 6.70 (s, 1H), 2.28 (s, 3H).

$^{13}\text{C}$  NMR (101 MHz,  $\text{CDCl}_3$ )  $\delta$  147.7, 145.2, 139.7, 139.0, 138.9, 133.9, 130.8, 130.4, 129.5, 126.7, 126.0, 125.0, 123.0, 121.4, 116.9, 116.3, 21.7.

### 5-Methyl-2-phenyl-1-tosyl-1*H*-indole (2q)

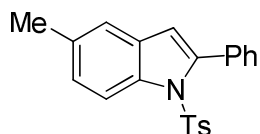

Prepared by the method C. Column chromatography (eluent: petroleum ether : EtOAc = 100:1, v/v) to afford **2q** (32.8 mg, 91 % yield) as a white solid. The NMR data match the reported in the literature.<sup>2</sup>

$^1\text{H}$  NMR (400 MHz,  $\text{CDCl}_3$ )  $\delta$  8.17 (d,  $J = 8.5$  Hz, 1H), 7.50 (dd,  $J = 6.6, 3.0$  Hz, 2H), 7.45 – 7.37 (m, 3H), 7.28 – 7.23 (m, 2H), 7.20 (s, 1H), 7.16 (d,  $J = 8.6$  Hz, 1H), 7.01 (d,  $J = 8.2$  Hz, 2H), 6.46 (s, 1H), 2.39 (s, 3H), 2.25 (s, 3H).

$^{13}\text{C}$  NMR (101 MHz,  $\text{CDCl}_3$ )  $\delta$  144.5, 142.3, 136.6, 134.6, 134.1, 132.6, 130.9, 130.4, 129.26, 128.7, 127.6, 126.9, 126.3, 120.8, 116.5, 113.8, 21.6, 21.4.

#### 6-Methyl-2-phenyl-1-tosyl-1*H*-indole (**2r**)

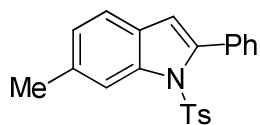

Prepared by the method C. Column chromatography (eluent: petroleum ether : EtOAc = 100:1, v/v) to afford **2r** (31.6 mg, 88 % yield) as a white solid. The NMR data match the reported in the literature.<sup>2</sup>

$^1\text{H}$  NMR (400 MHz,  $\text{CDCl}_3$ )  $\delta$  8.13 (s, 1H), 7.48 (dd,  $J$  = 6.6, 2.9 Hz, 2H), 7.40 (dd,  $J$  = 7.0, 3.5 Hz, 3H), 7.30 (d,  $J$  = 7.9 Hz, 1H), 7.26 (d,  $J$  = 8.3 Hz, 2H), 7.08 (d,  $J$  = 7.9 Hz, 1H), 7.03 (d,  $J$  = 8.2 Hz, 2H), 6.48 (s, 1H), 2.52 (s, 3H), 2.27 (s, 3H).

$^{13}\text{C}$  NMR (101 MHz,  $\text{CDCl}_3$ )  $\delta$  144.5, 141.6, 138.8, 135.0, 134.7, 132.7, 130.4, 129.3, 128.6, 128.4, 127.6, 126.9, 125.9, 120.3, 116.9, 113.8, 22.2, 21.7.

#### 5-Chloro-2-phenyl-1-tosyl-1*H*-indole (**2s**)

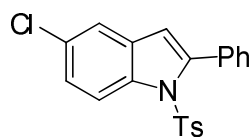

Prepared by the method C. Column chromatography (eluent: petroleum ether : EtOAc = 100:1, v/v) to afford **2s** (33.1 mg, 87 % yield) as a white solid. The NMR data match the reported in the literature.<sup>2</sup>

$^1\text{H}$  NMR (400 MHz,  $\text{CDCl}_3$ )  $\delta$  8.23 (d,  $J$  = 8.9 Hz, 1H), 7.50 – 7.38 (m, 6H), 7.30 (dd,  $J$  = 8.9, 1.9 Hz, 1H), 7.24 (d,  $J$  = 8.0 Hz, 2H), 7.05 (d,  $J$  = 8.1 Hz, 2H), 6.46 (s, 1H), 2.29 (s, 3H).

$^{13}\text{C}$  NMR (101 MHz,  $\text{CDCl}_3$ )  $\delta$  145.0, 143.7, 136.7, 134.4, 132.0, 131.8, 130.5, 130.1, 129.4, 129.1, 127.7, 126.9, 125.0, 120.4, 117.8, 112.8, 21.7.

#### 6-Chloro-2-phenyl-1-tosyl-1*H*-indole (**2t**)

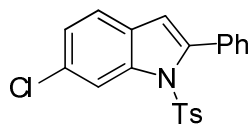

Prepared by the method C. Column chromatography (eluent: petroleum ether : EtOAc = 100:1, v/v) to afford **2t** (36.4 mg, 95 % yield) as a white solid. The NMR data match the reported in the literature.<sup>2</sup>

<sup>1</sup>H NMR (400 MHz, CDCl<sub>3</sub>) δ 8.35 (d, *J* = 0.9 Hz, 1H), 7.48 – 7.38 (m, 5H), 7.34 (d, *J* = 8.3 Hz, 1H), 7.24 (dd, *J* = 12.7, 5.0 Hz, 3H), 7.05 (d, *J* = 8.2 Hz, 2H), 6.48 (s, 1H), 2.29 (s, 3H).

<sup>13</sup>C NMR (101 MHz, CDCl<sub>3</sub>) δ 145.0, 142.8, 138.7, 134.6, 132.0, 130.7, 130.5, 129.5, 129.0, 127.0, 127.7, 126.9, 125.0, 121.5, 116.8, 113.0, 21.7.

#### 2-Phenyl-1-tosyl-5-(trifluoromethyl)-1H-indole (2u)

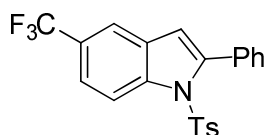

Prepared by the method C. Column chromatography (eluent: petroleum ether : EtOAc = 100:1, v/v) to afford **2u** (38.7 mg, 93 % yield) as a white solid. The NMR data match the reported in the literature.<sup>2</sup>

<sup>1</sup>H NMR (400 MHz, CDCl<sub>3</sub>) δ 8.42 (d, *J* = 8.8 Hz, 1H), 7.74 (s, 1H), 7.59 (d, *J* = 8.8 Hz, 1H), 7.51 – 7.36 (m, 5H), 7.26 (d, *J* = 8.3 Hz, 2H), 7.06 (d, *J* = 8.2 Hz, 2H), 6.58 (s, 1H), 2.30 (s, 3H).

<sup>13</sup>C NMR (101 MHz, CDCl<sub>3</sub>) δ 145.2, 143.8, 139.7, 134.7, 131.7, 130.7, 130.6, 130.1, 129.6, 129.6, 129.2, 127.7, 127.0, 126.9, 126.8, 126.4, 126.0, 123.3, 121.5, 121.5, 118.3, 118.2, 116.8, 112.9, 21.7.

<sup>19</sup>F NMR (377 MHz, CDCl<sub>3</sub>) δ -61.27.

#### 5-Fluoro-2-phenyl-1-tosyl-1H-indole (2v)

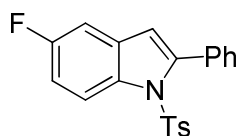

Prepared by the method C. Column chromatography (eluent: petroleum ether : EtOAc = 100:1, v/v) to afford 2v (35.0 mg, 96 % yield) as a white solid. The NMR data match the reported in the literature.<sup>13</sup>

<sup>1</sup>H NMR (400 MHz, CDCl<sub>3</sub>) δ 8.25 (dd, *J* = 9.7, 4.4 Hz, 1H), 7.54 – 7.46 (m, 2H), 7.42 (d, *J* = 6.4 Hz, 3H), 7.23 (d, *J* = 7.9 Hz, 2H), 7.05 (dd, *J* = 14.8, 8.3 Hz, 4H), 6.49 (s, 1H), 2.28 (s, 3H).

<sup>13</sup>C NMR (101 MHz, CDCl<sub>3</sub>) δ 161.5, 159.1, 144.9, 144.1, 134.6, 134.3, 132.1, 131.8, 131.7, 130.4, 129.4, 129.0, 127.7, 126.9, 118.0, 117.9, 113.5, 113.4, 112.8, 112.5, 106.5, 106.3, 21.7.

<sup>19</sup>F NMR (377 MHz, CDCl<sub>3</sub>) δ -118.54.

#### 2-Methyl-3-phenyl-1-tosyl-1*H*-indole (4)

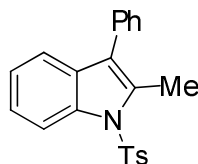

Prepared by the method C. Column chromatography (eluent: petroleum ether : EtOAc = 100:1, v/v) to afford **4** (35.7 mg, 99 % yield) as a white solid. The NMR data match the reported in the literature.<sup>2</sup>

<sup>1</sup>H NMR (400 MHz, CDCl<sub>3</sub>) δ 8.26 (d, *J* = 8.4 Hz, 1H), 7.71 (d, *J* = 8.3 Hz, 2H), 7.47 – 7.38 (m, 3H), 7.35 (t, *J* = 6.7 Hz, 3H), 7.29 (d, *J* = 7.4 Hz, 1H), 7.24 – 7.17 (m, 3H), 2.59 (s, 3H), 2.33 (s, 3H).

<sup>13</sup>C NMR (101 MHz, CDCl<sub>3</sub>) δ 144.9, 136.5, 136.4, 133.2, 133.2, 130.2, 130.1, 130.0, 128.7, 127.4, 126.5, 124.4, 123.6, 122.7, 119.3, 114.6, 21.7, 13.7.

## 5. NMR Spectra for Substrates and Products

### NMR Spectra of Substrate 1a

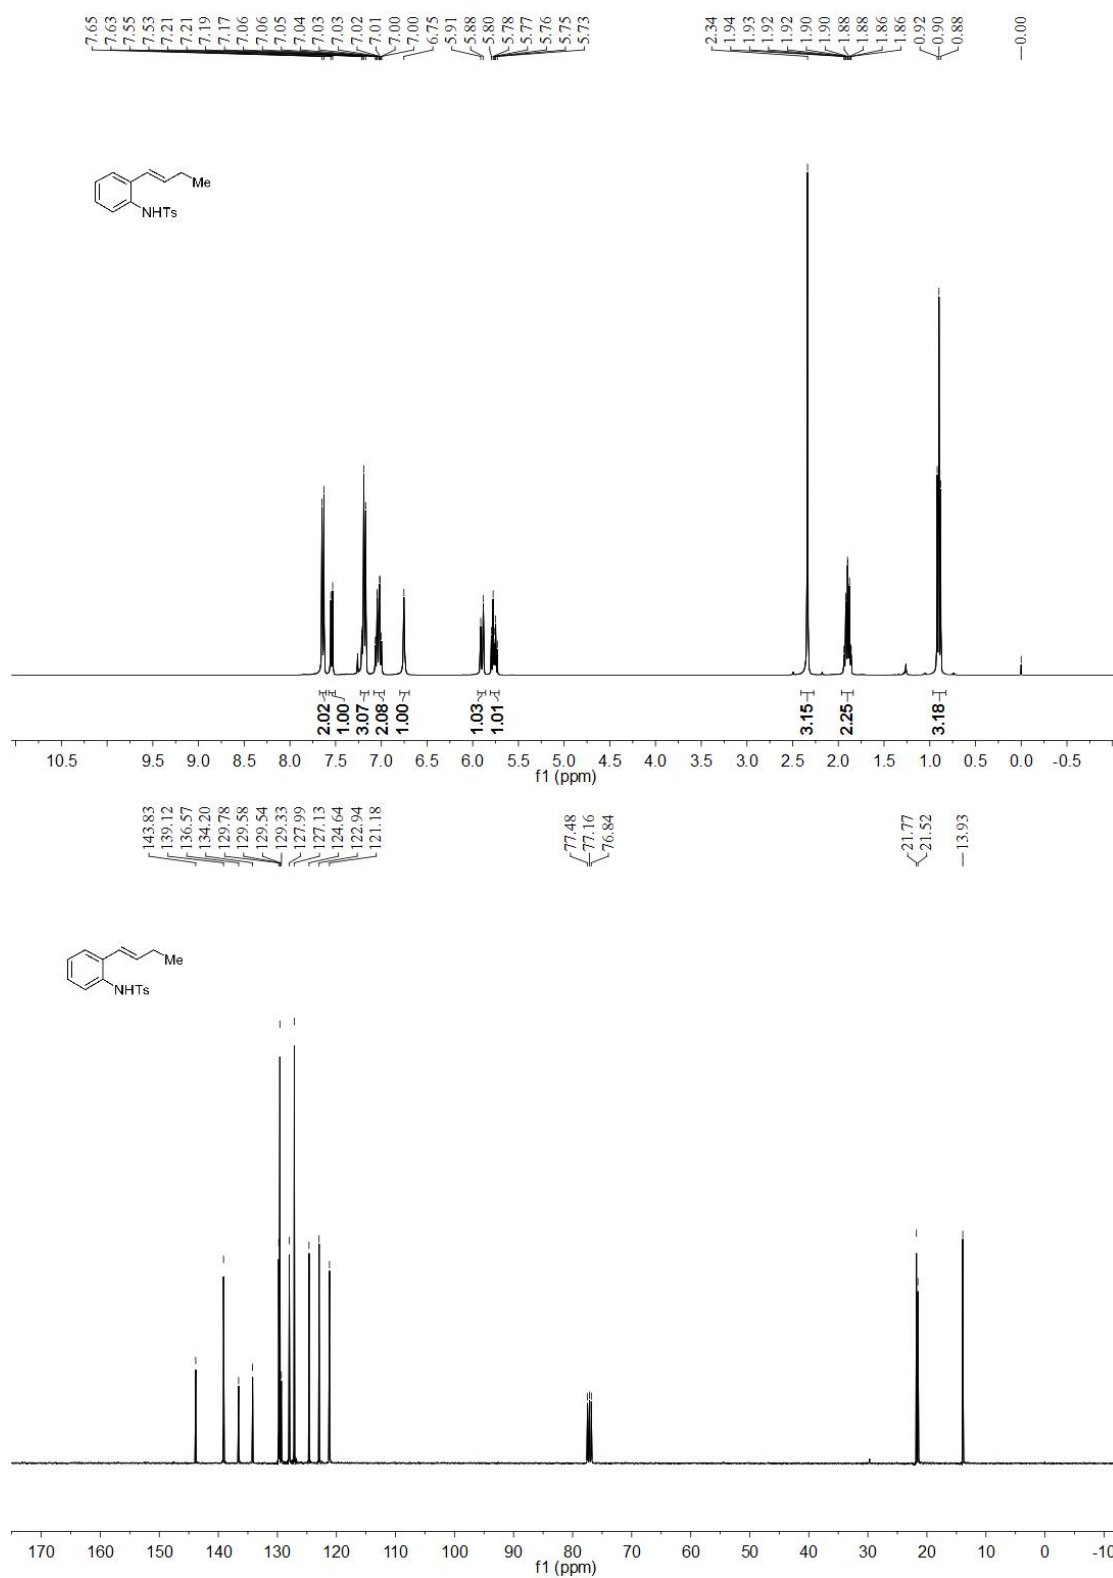



## NMR Spectra of Substrate 1b

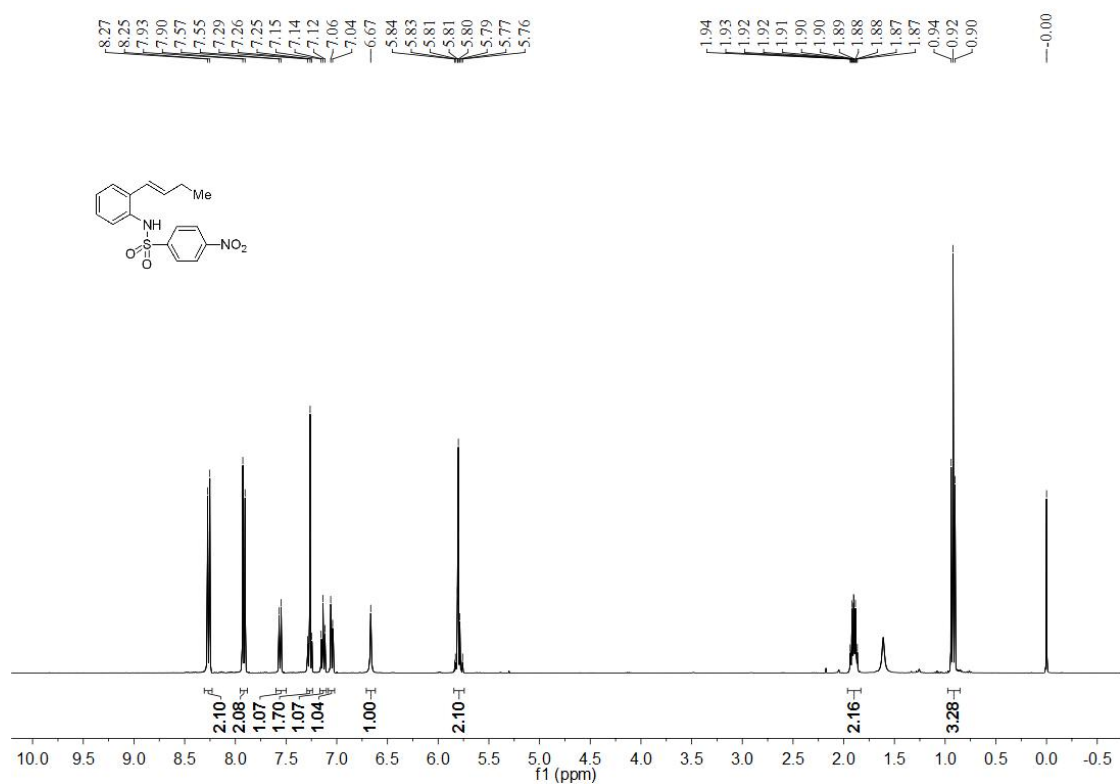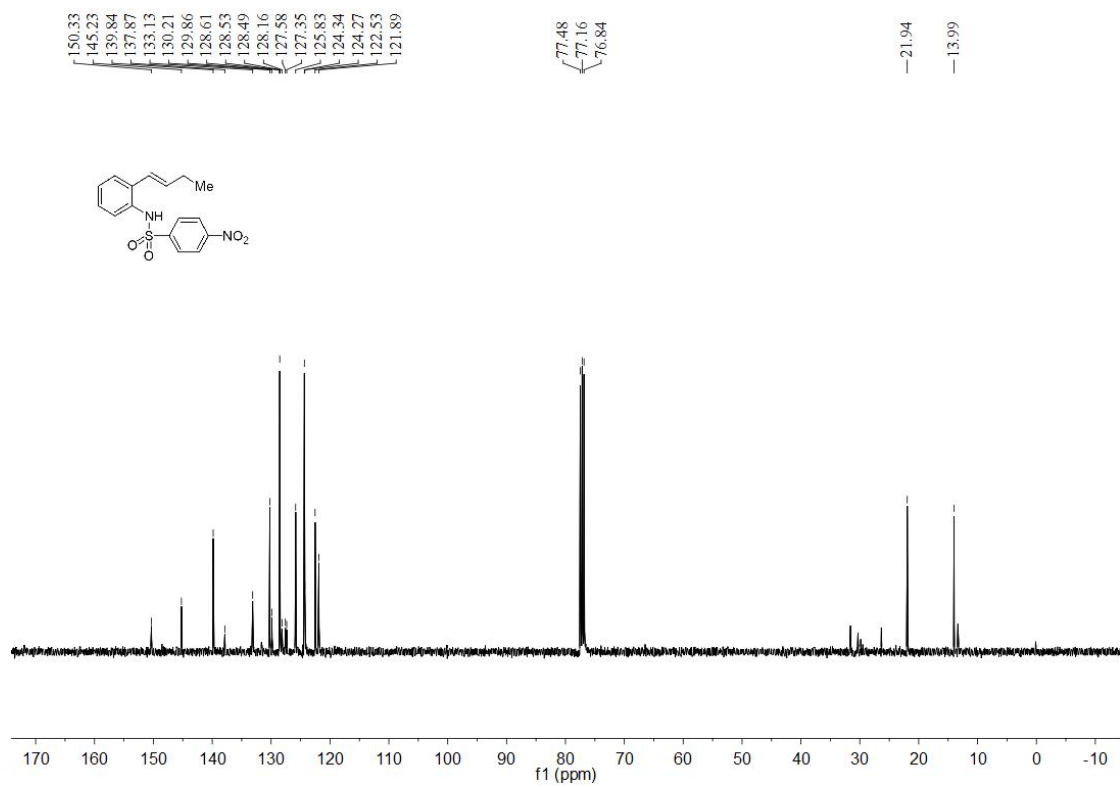

# NMR Spectra of Substrate *N*-Cbz-Protected 1

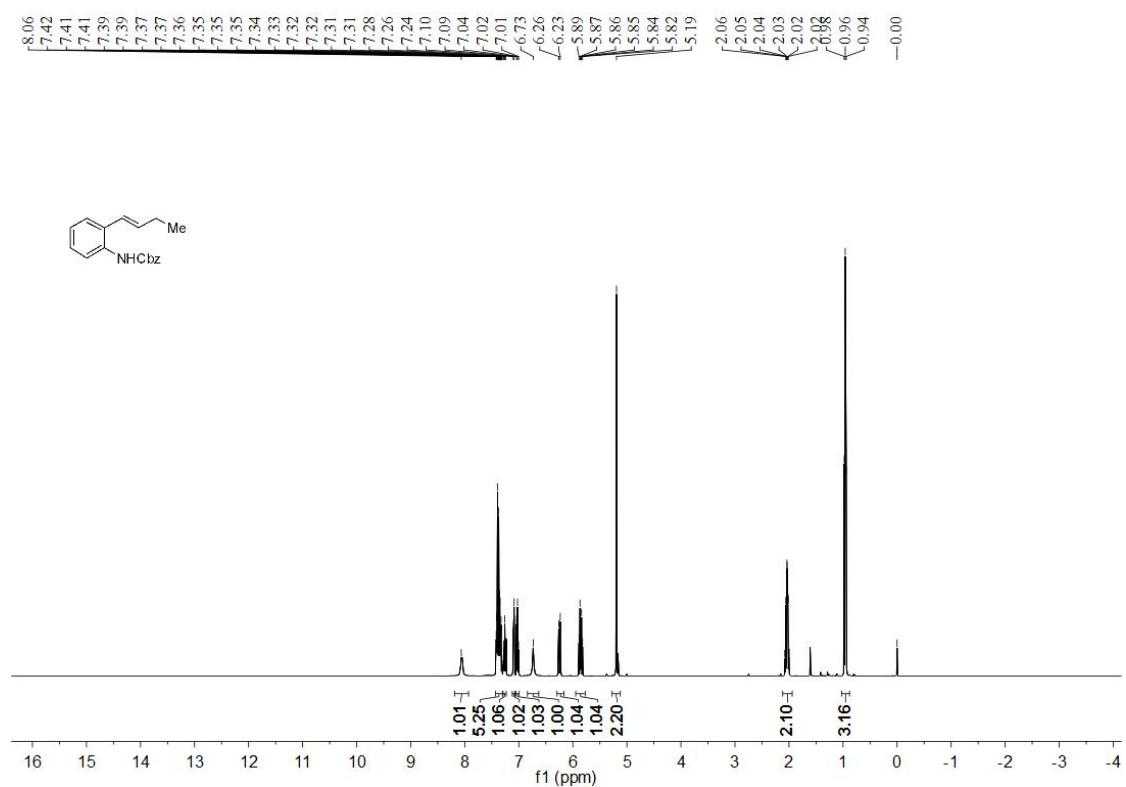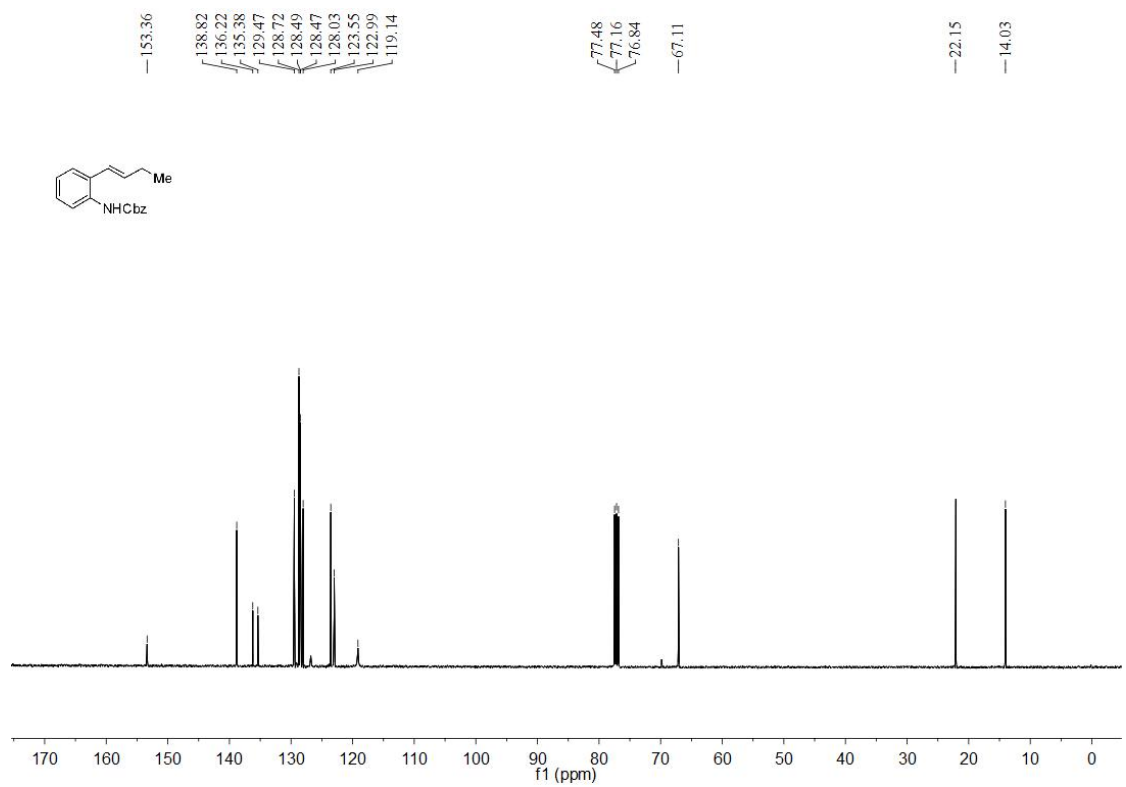

## NMR Spectra of Substrate *N*-Ac-Protected 1

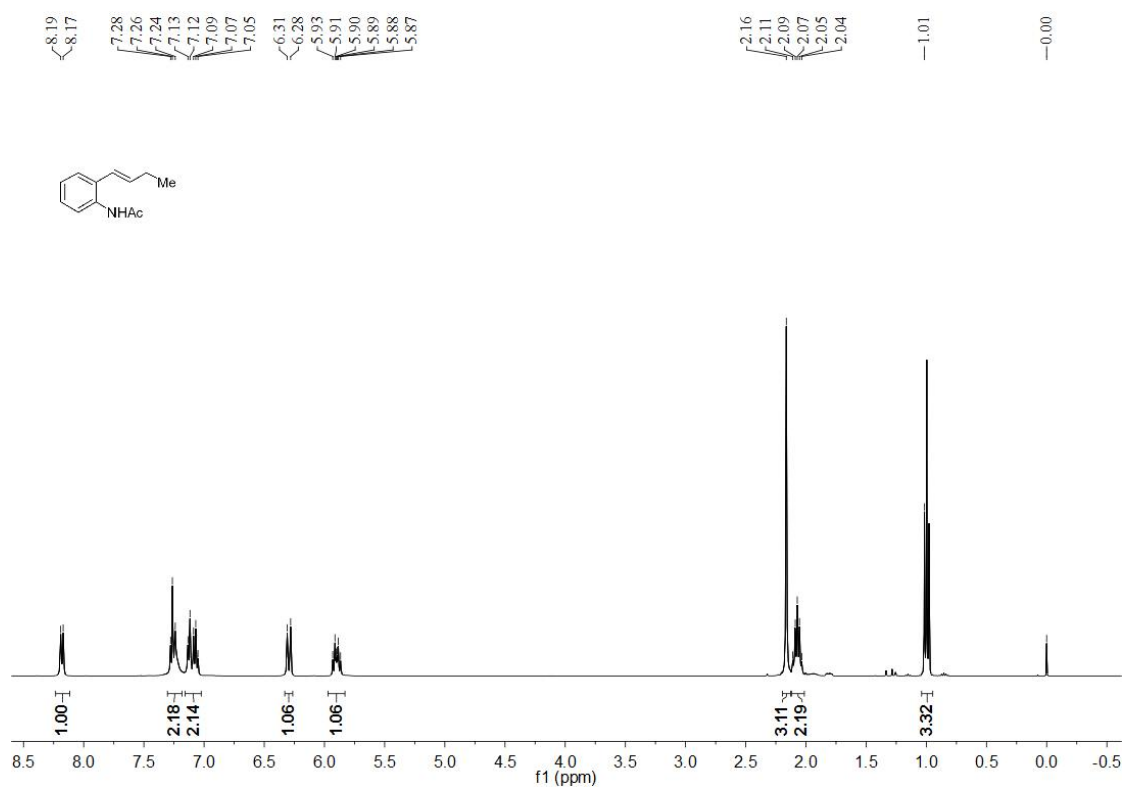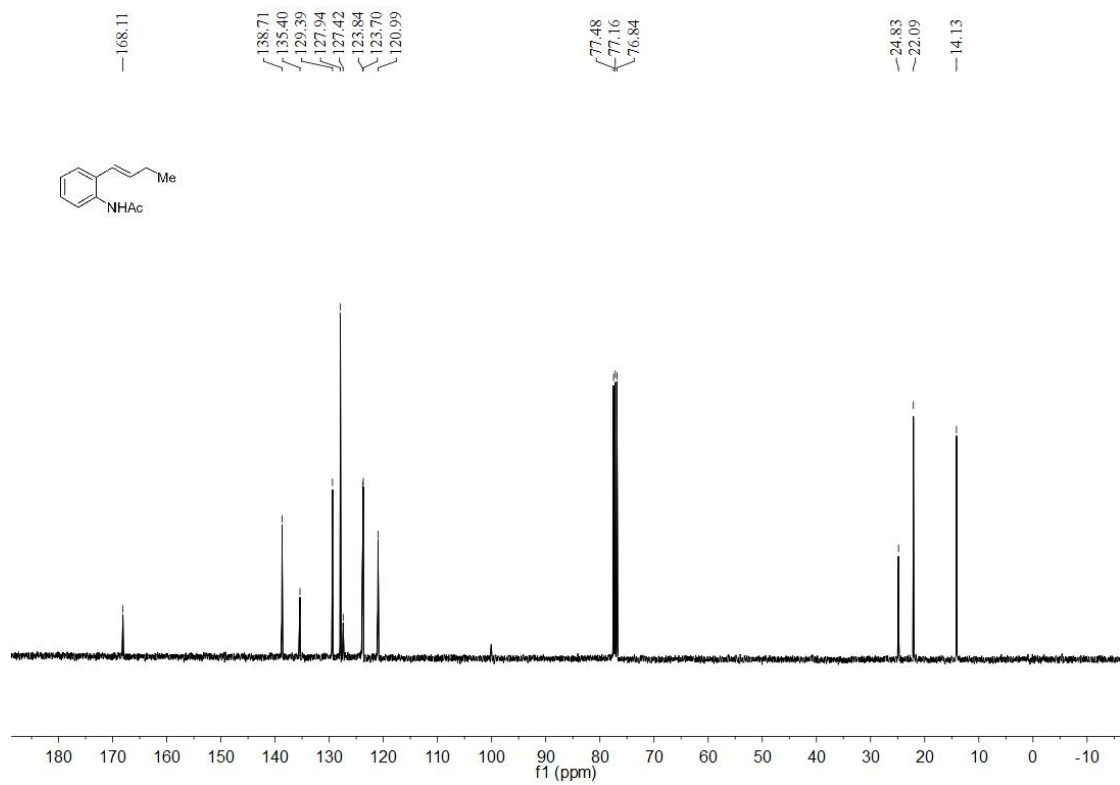

# NMR Spectra of Substrate *N*-Boc-Protected 1

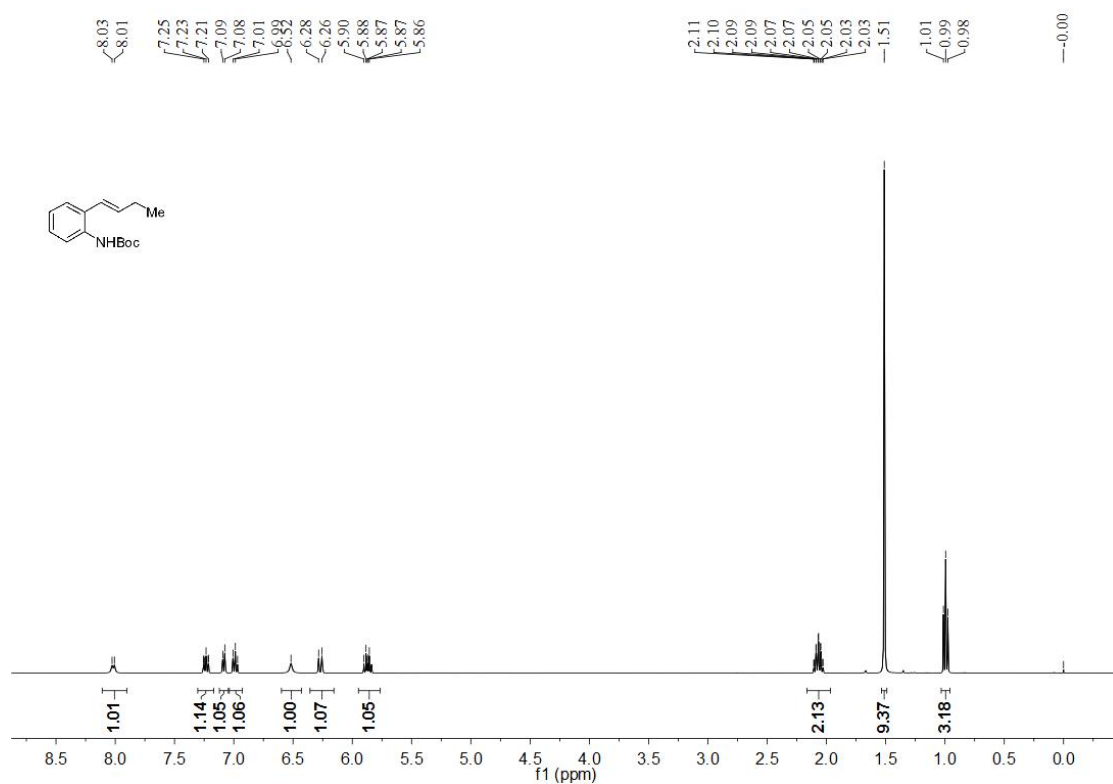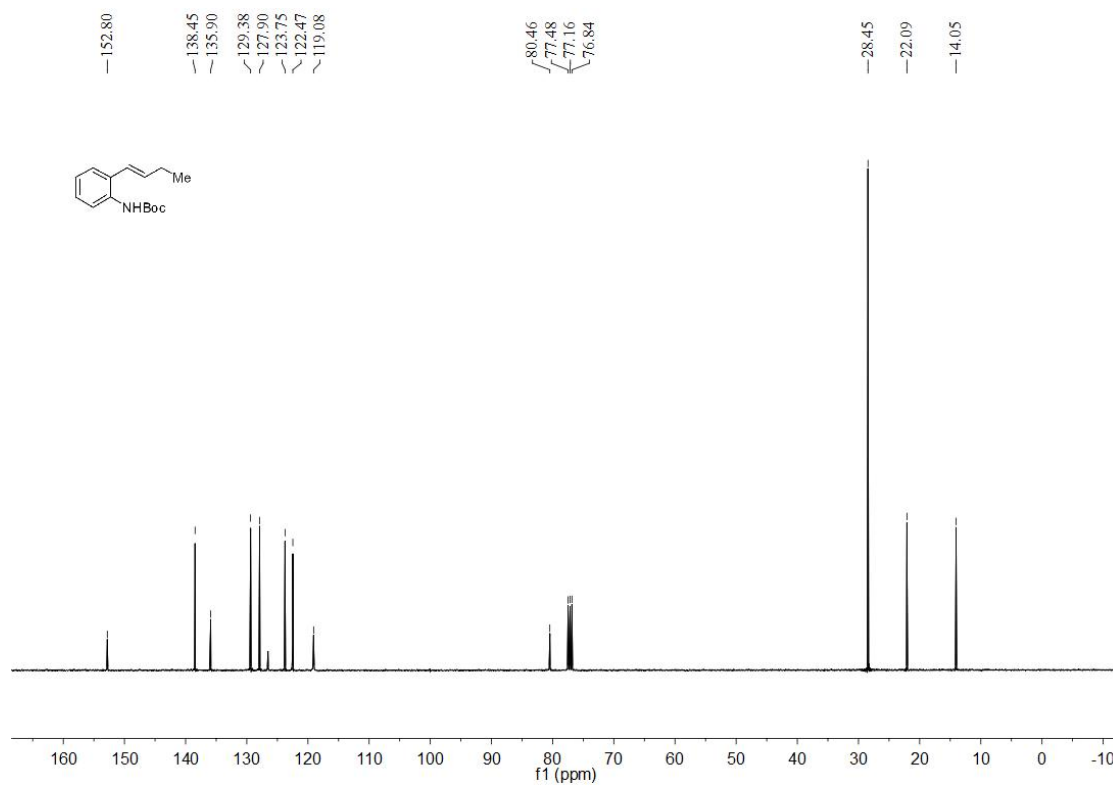

# NMR Spectra of Substrate 1c

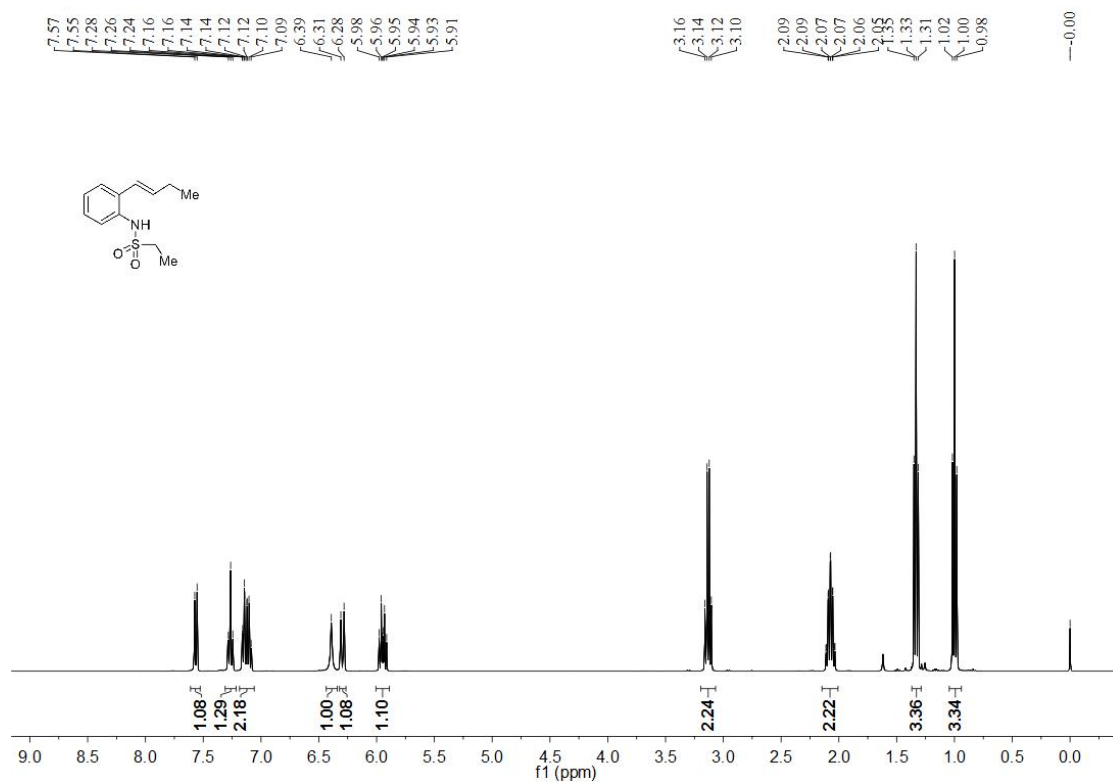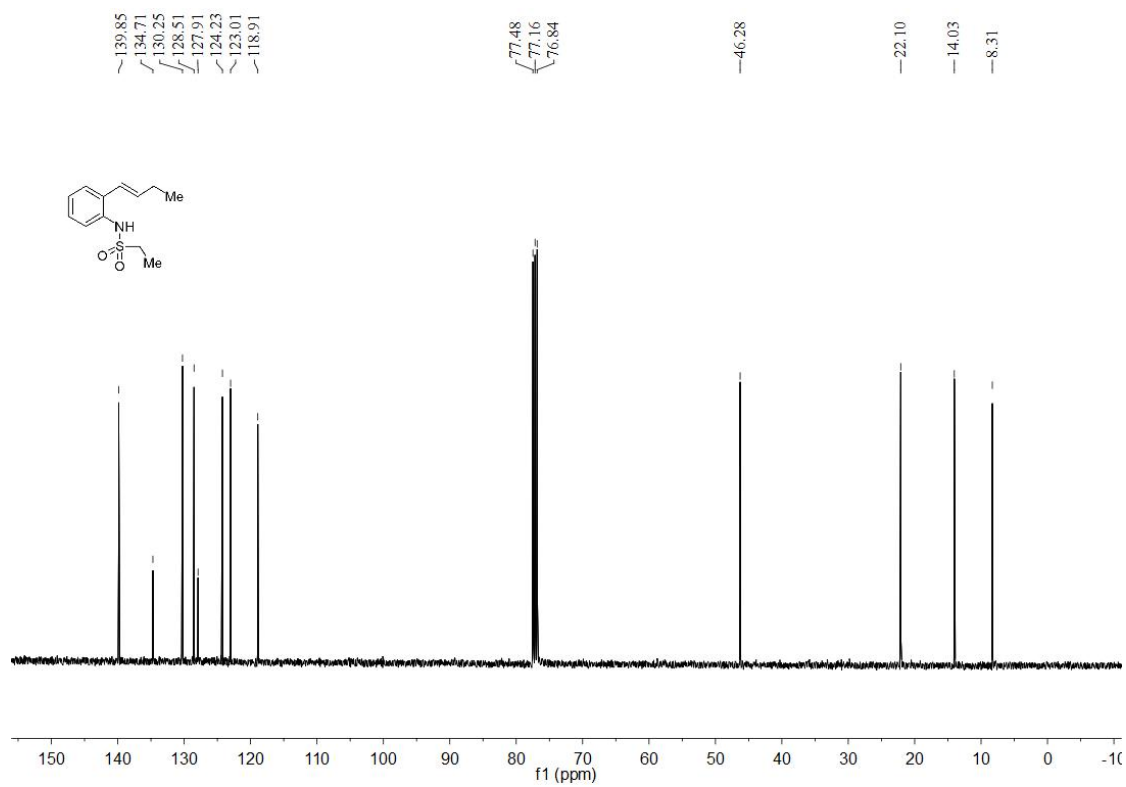

# NMR Spectrum of Substrate 1d

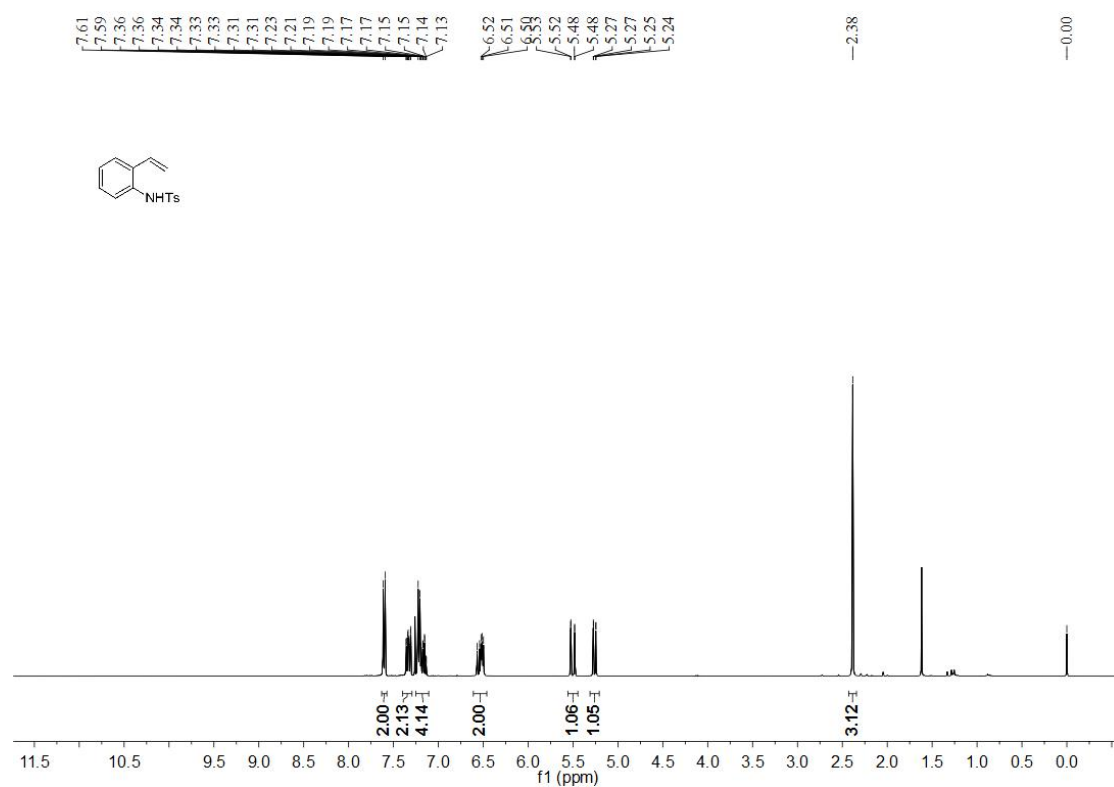

# NMR Spectra of Substrate 1e

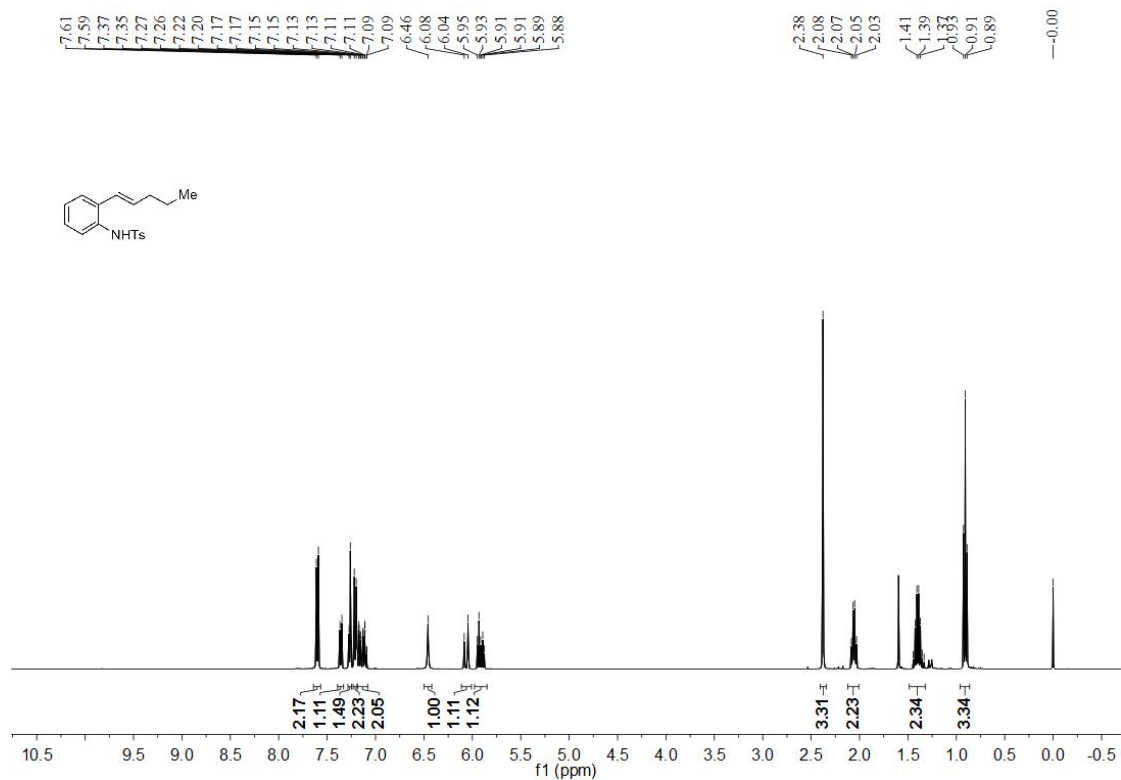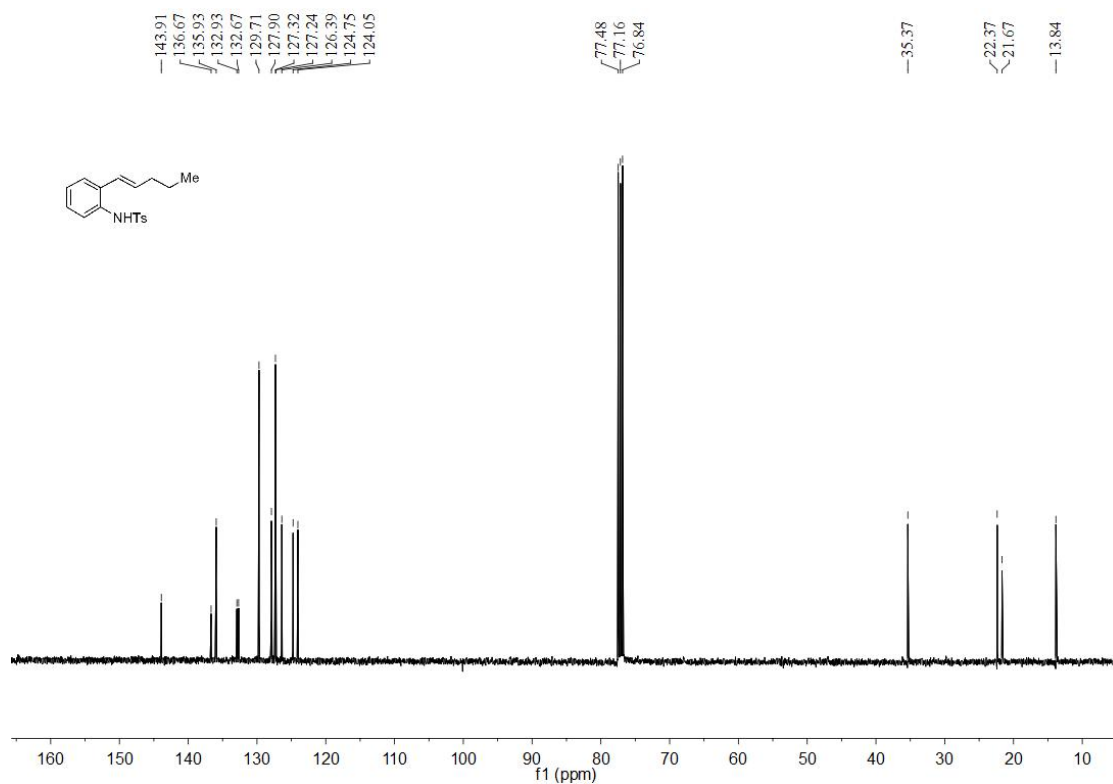

## NMR Spectra of Substrate 1f

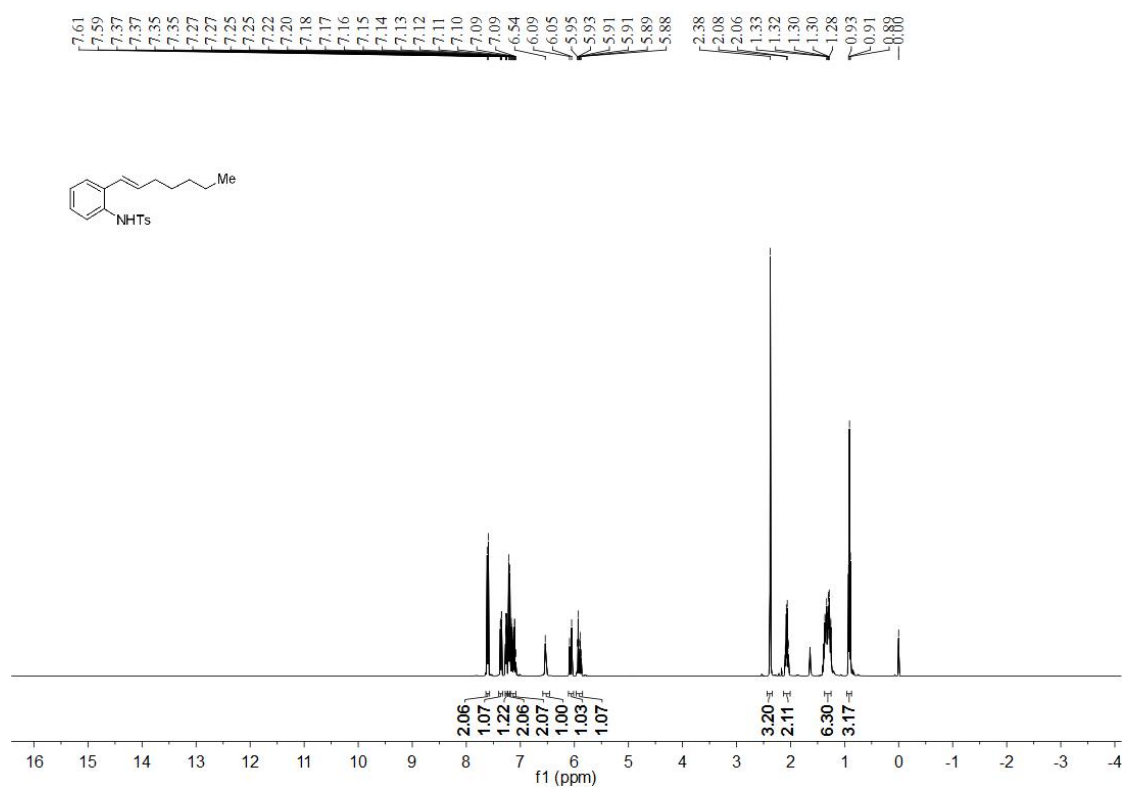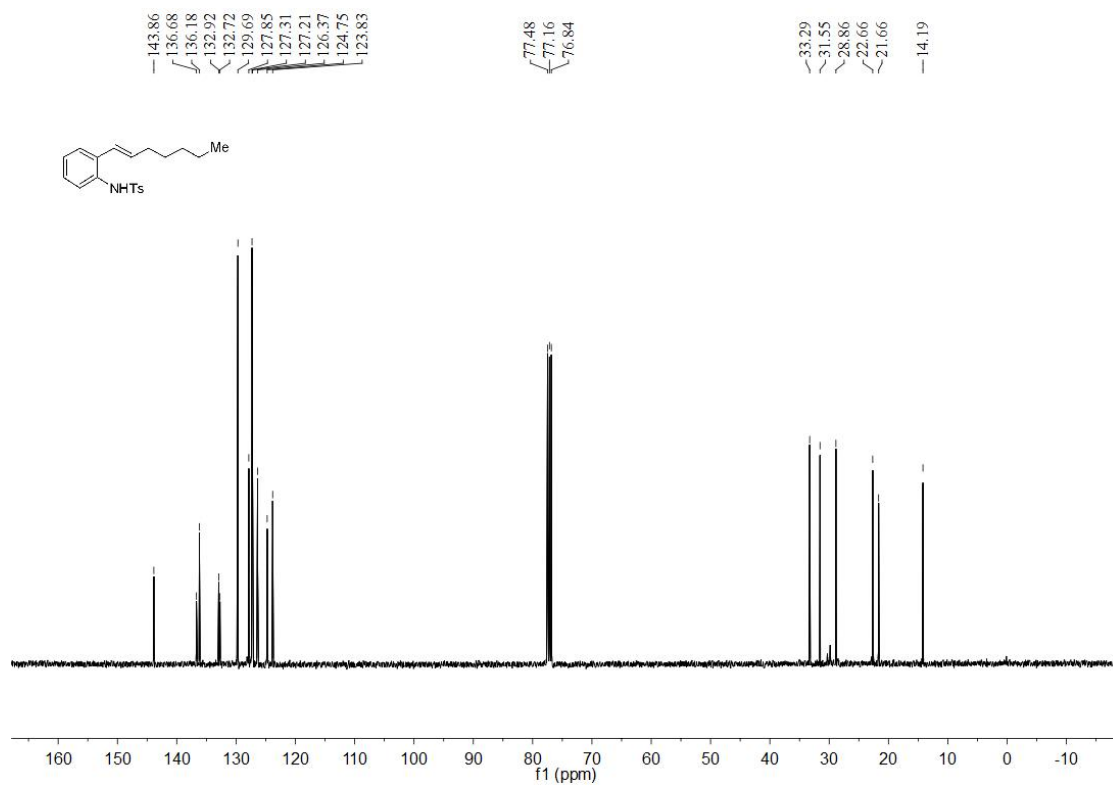



# NMR Spectra of Substrate 1g

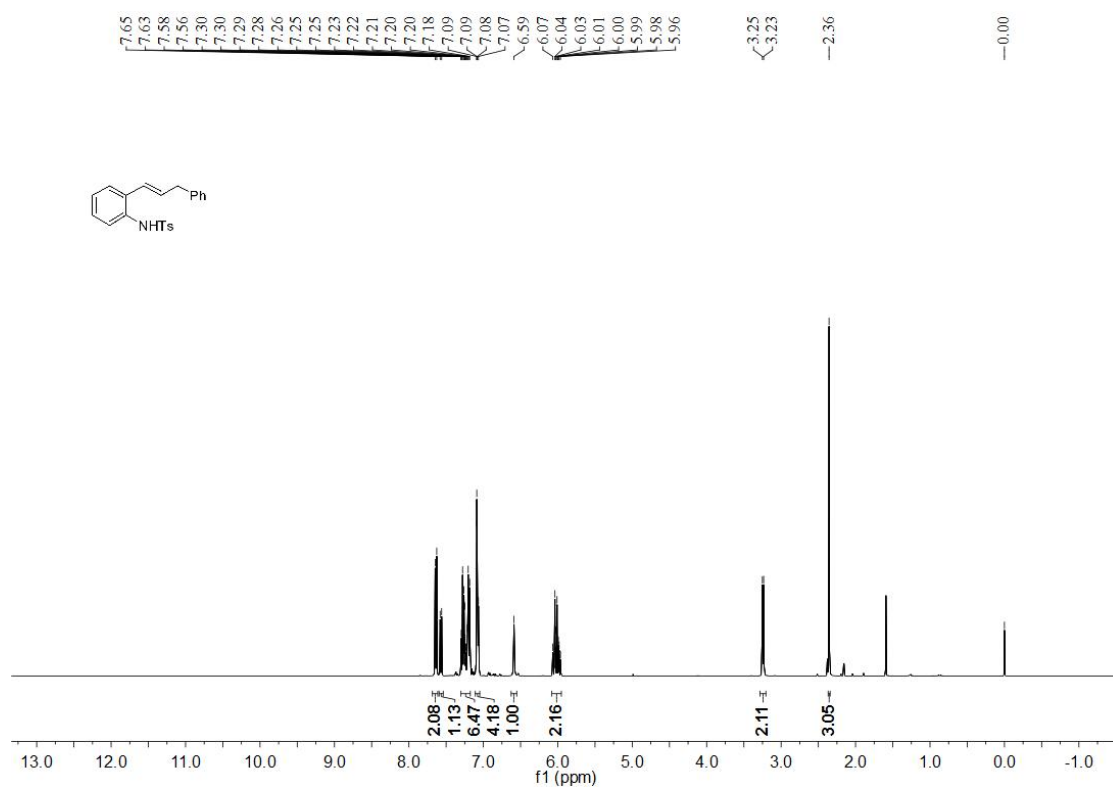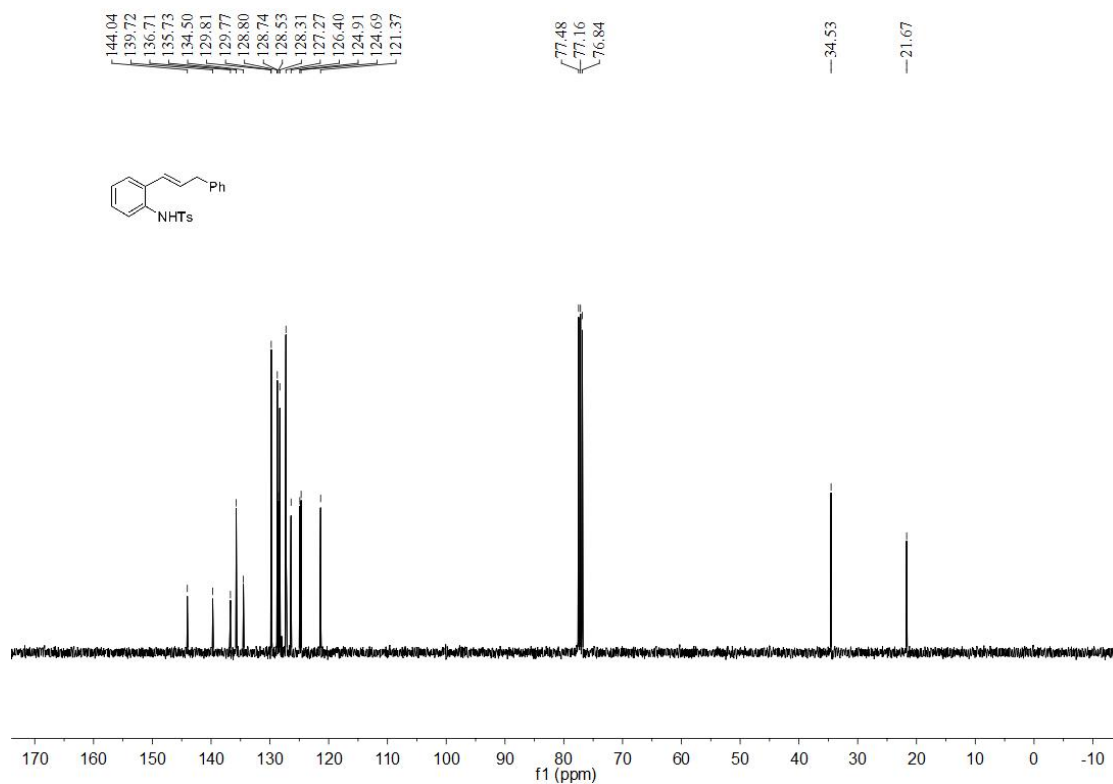

## NMR Spectra of Substrate 1h

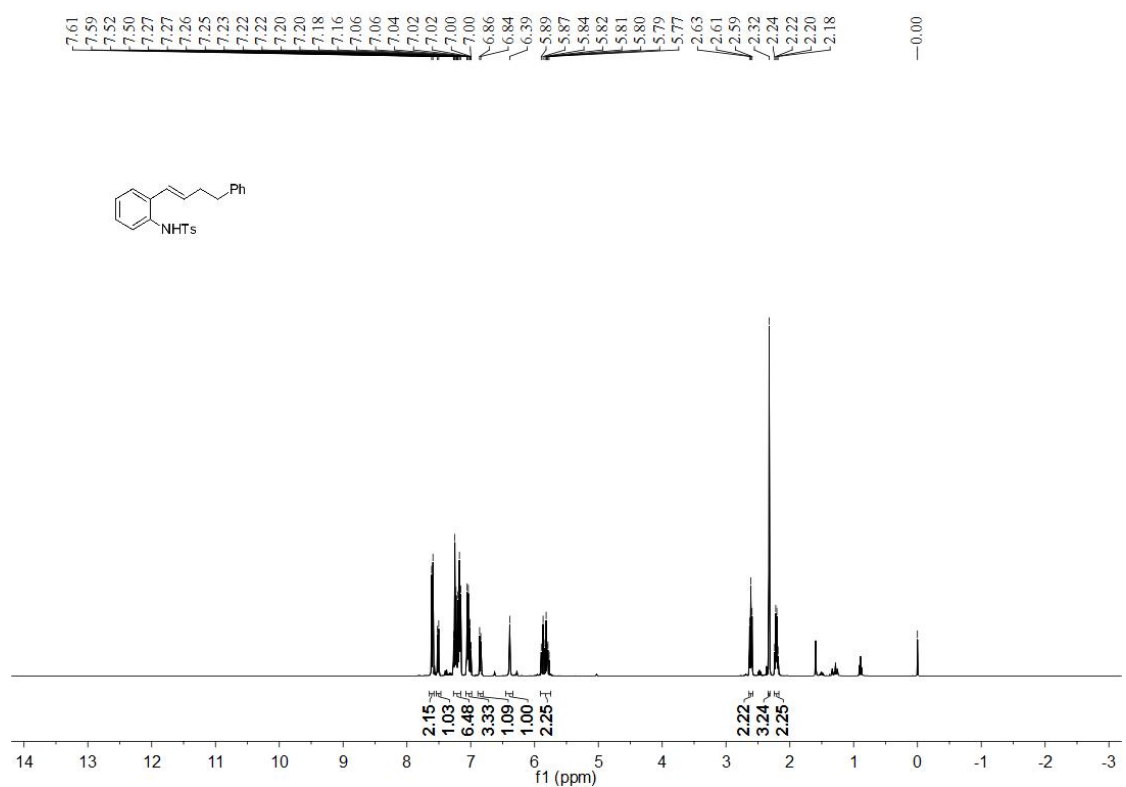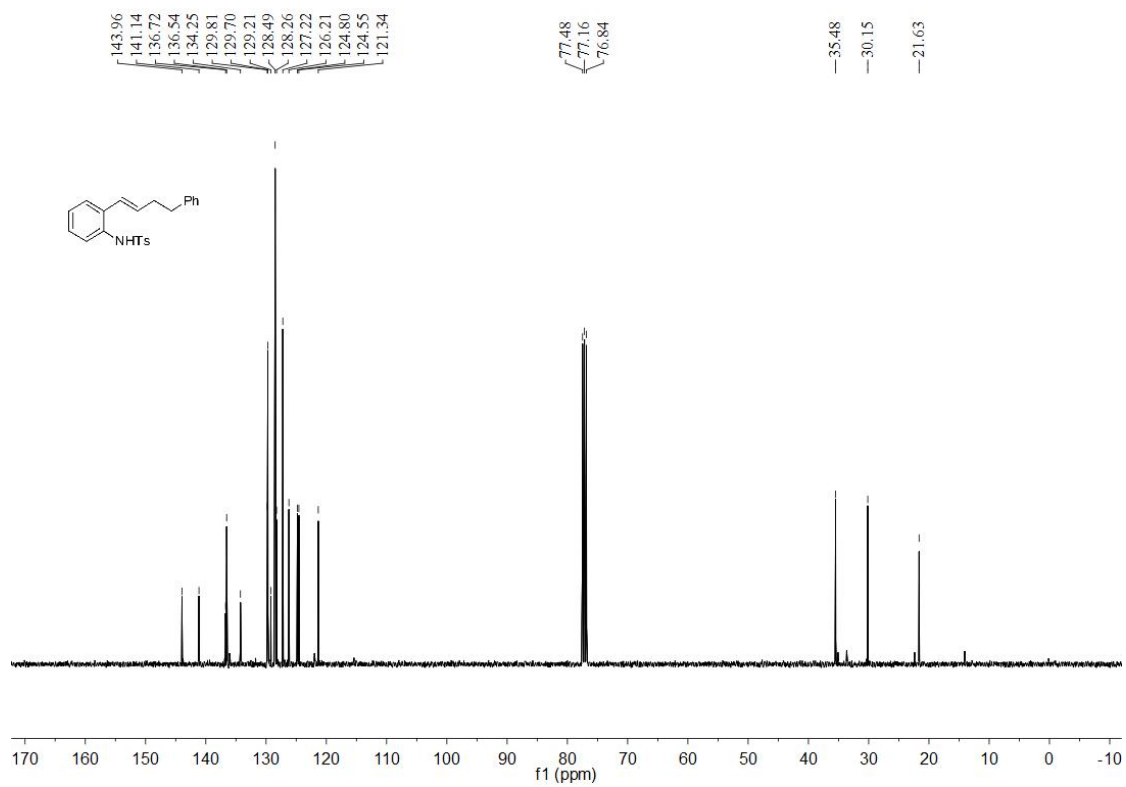

## NMR Spectra of Substrate 1i

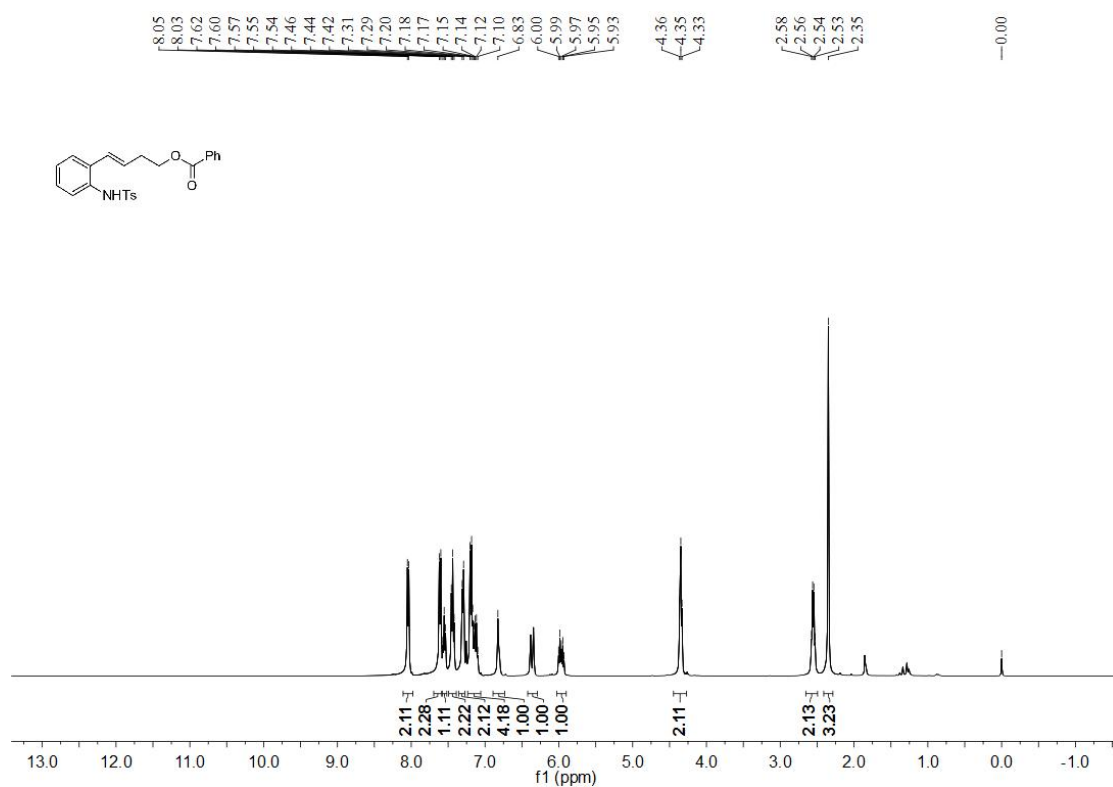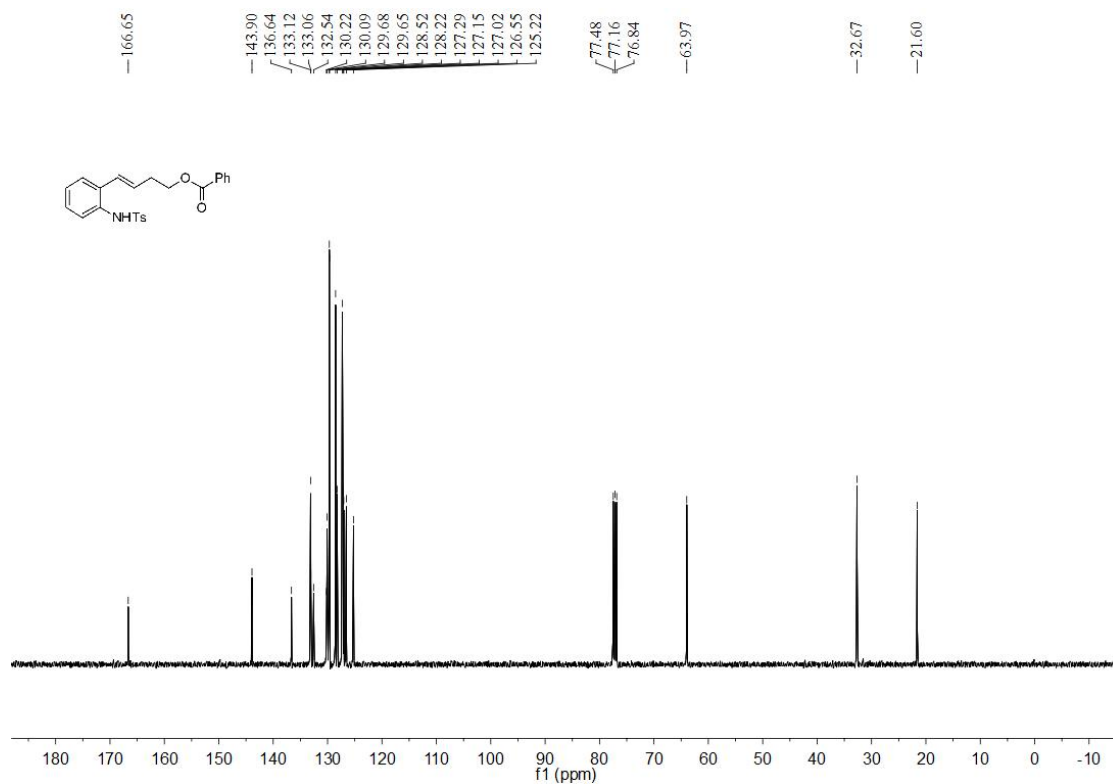

## NMR Spectra of Substrate 1j

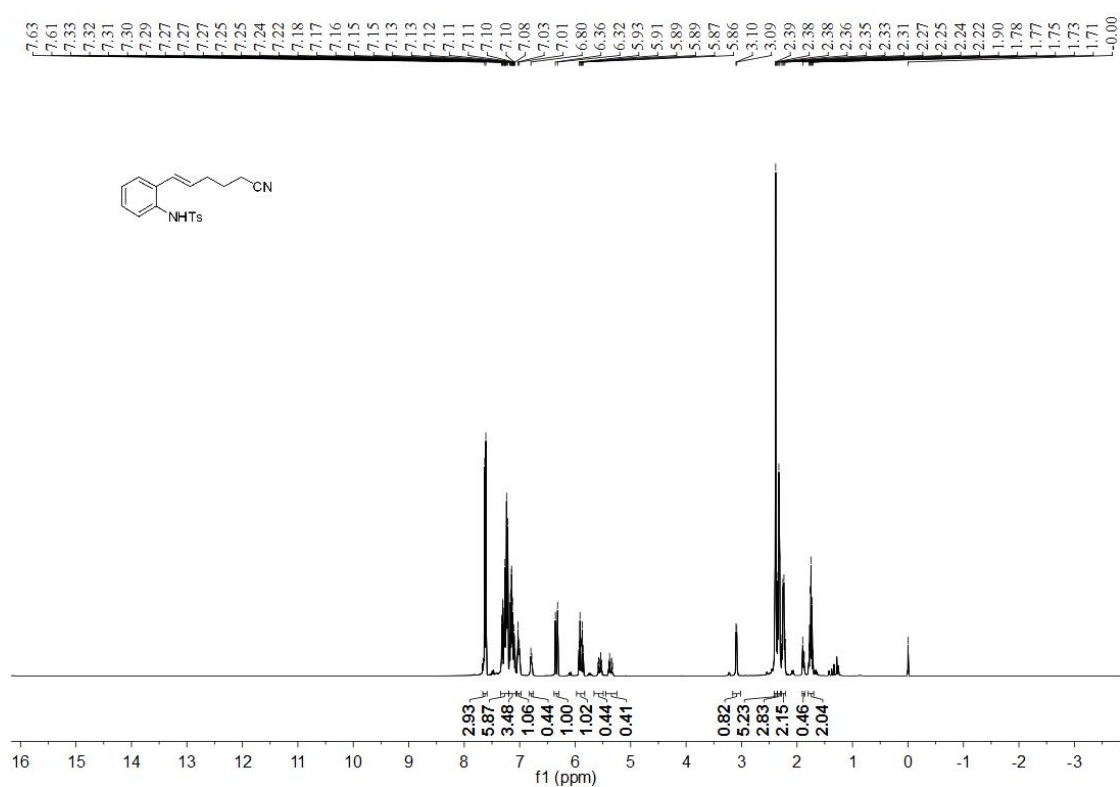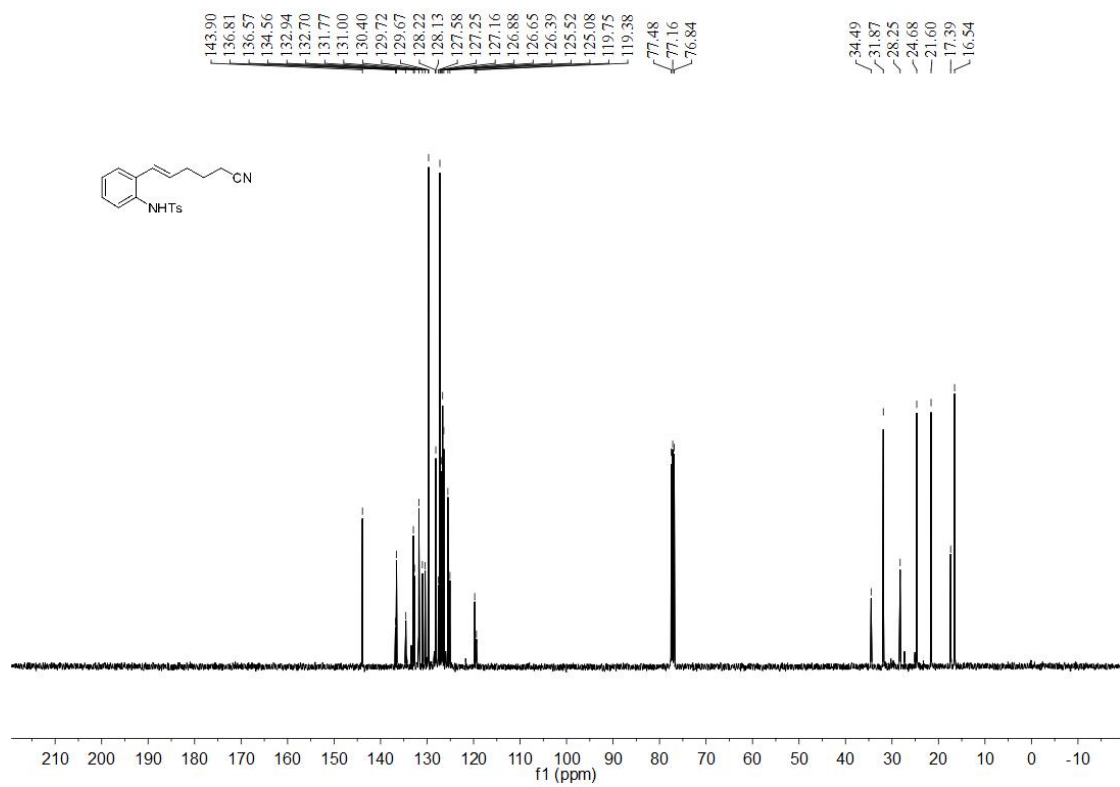

## NMR Spectra of Substrate 1k

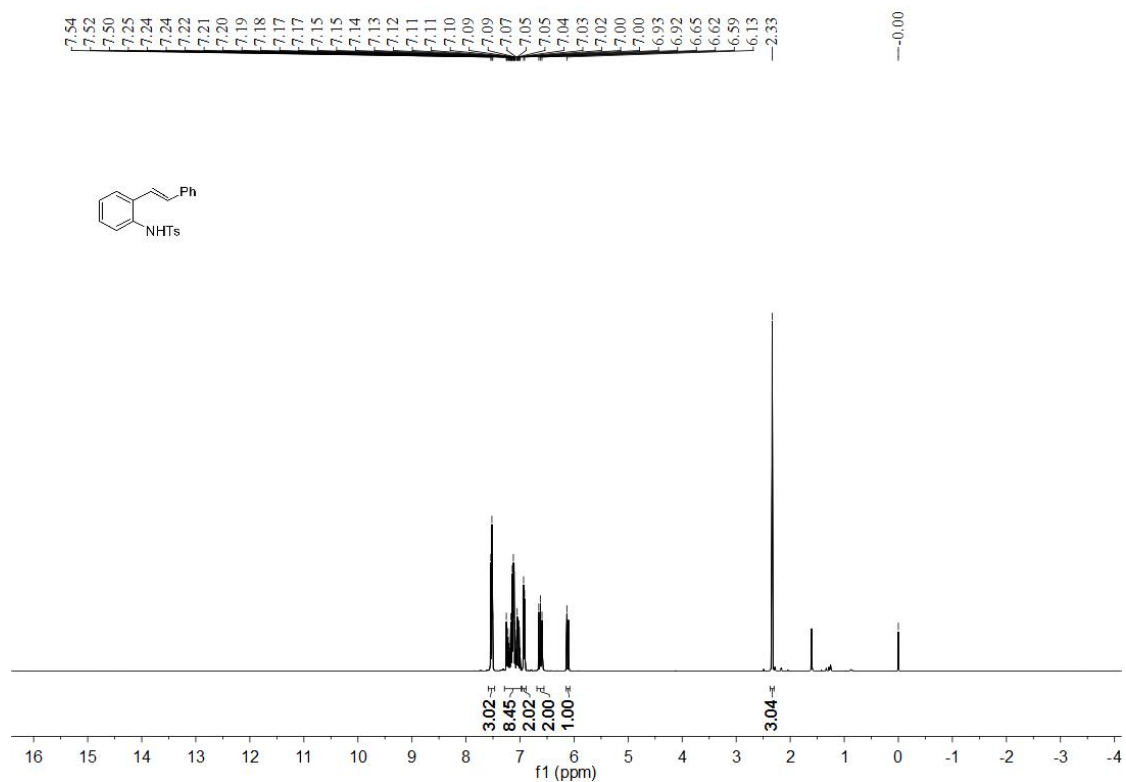

## NMR Spectra of Substrate 1l

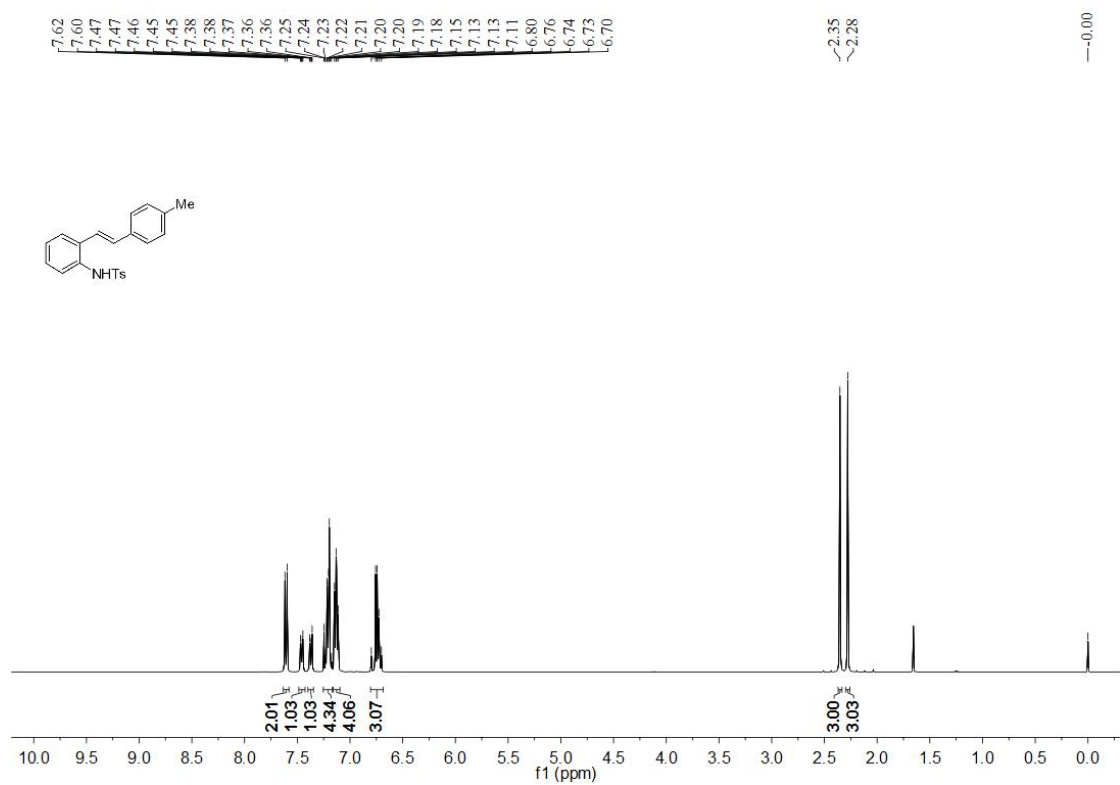

## NMR Spectrum of Substrate 1m

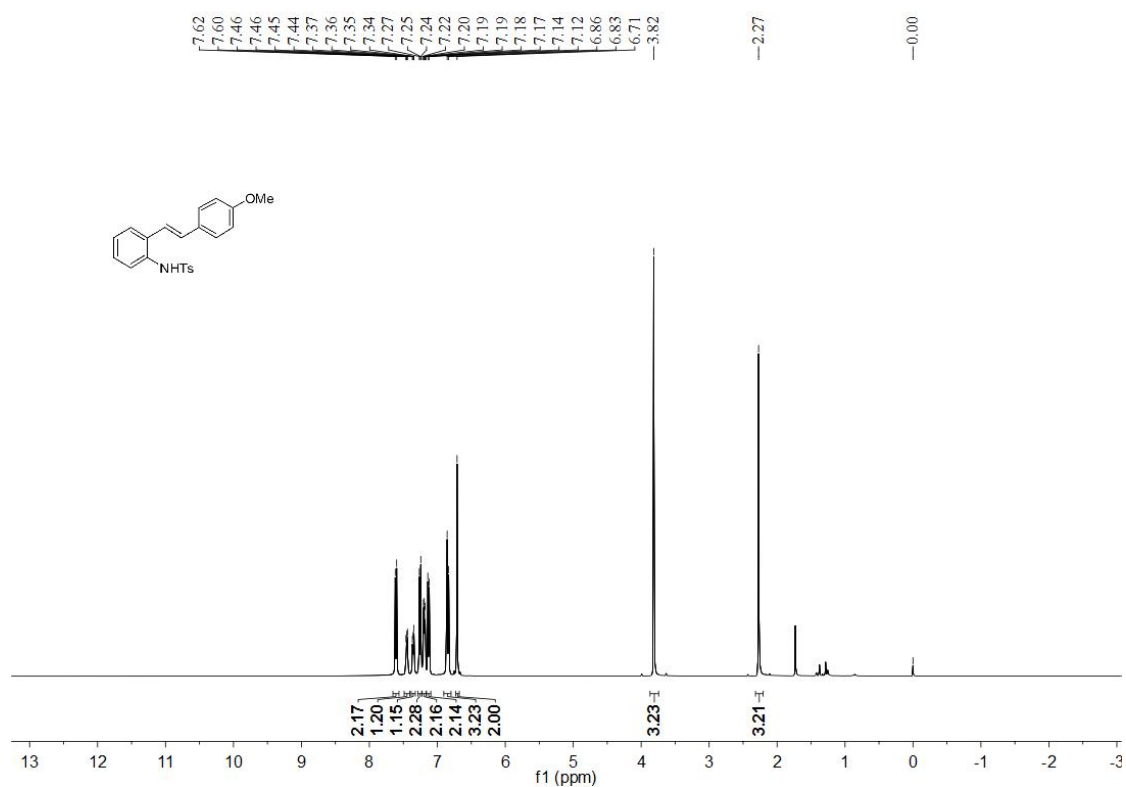

## NMR Spectrum of Substrate 1n

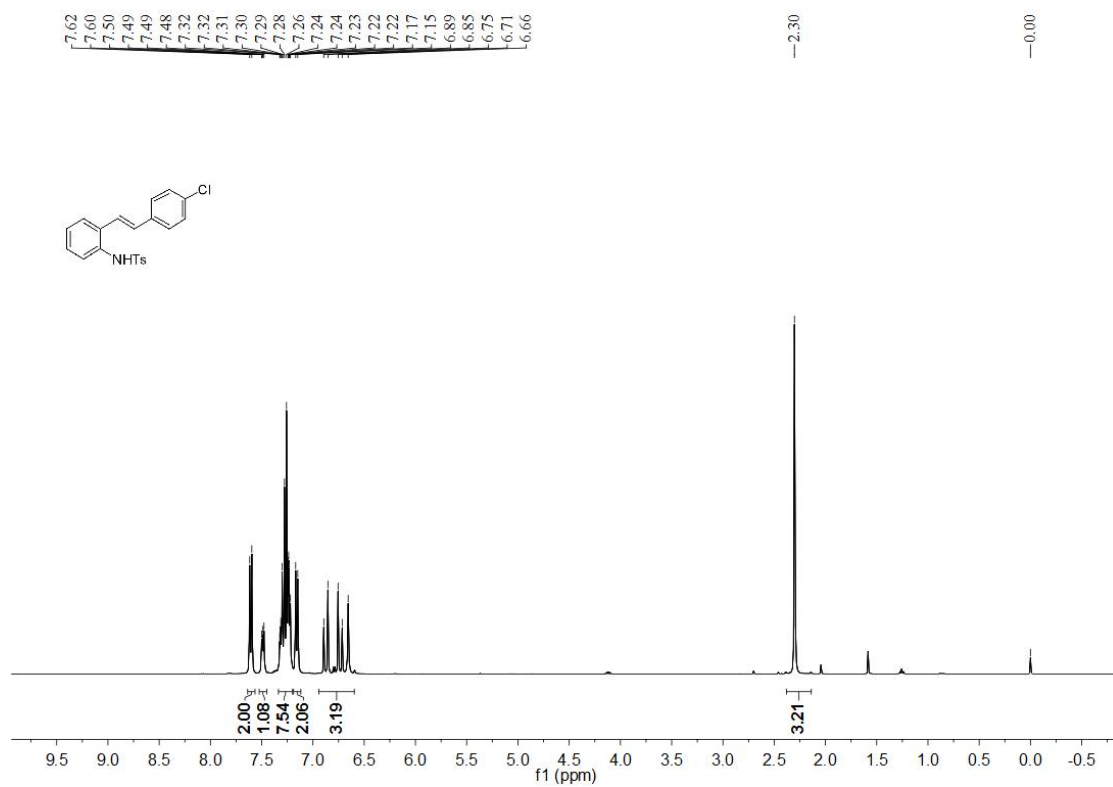

## NMR Spectrum of Substrate 1o

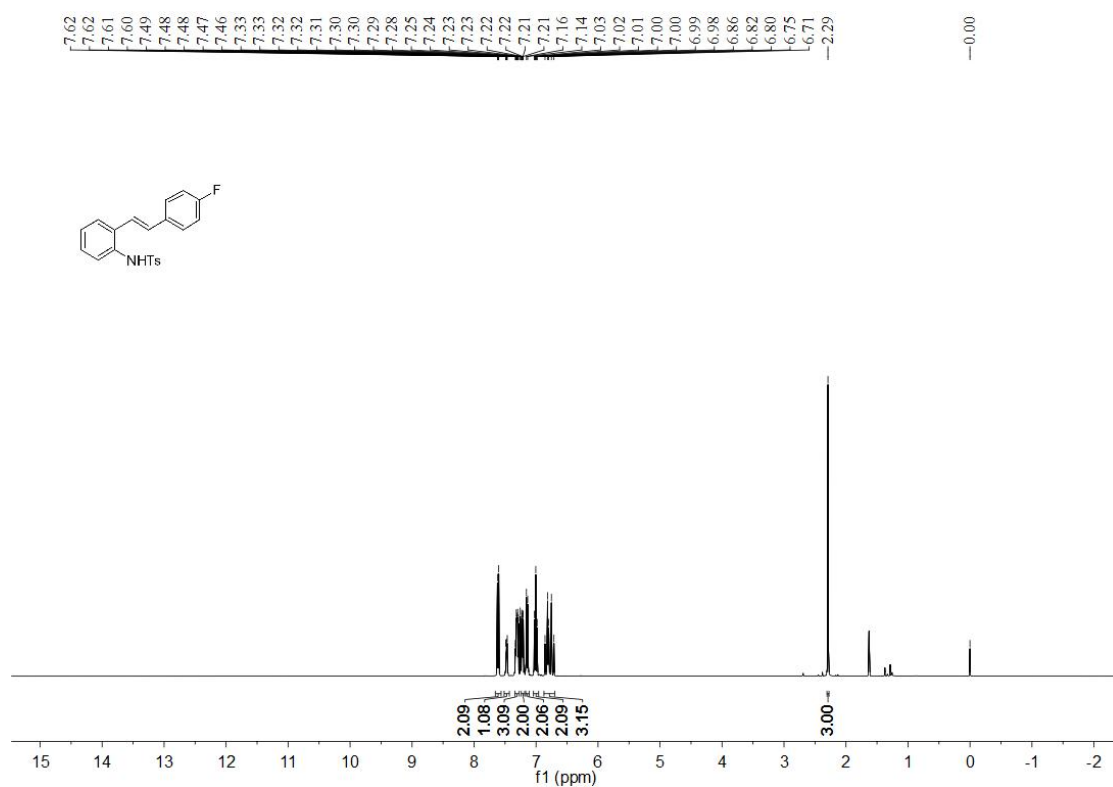

## NMR Spectrum of Substrate 1p

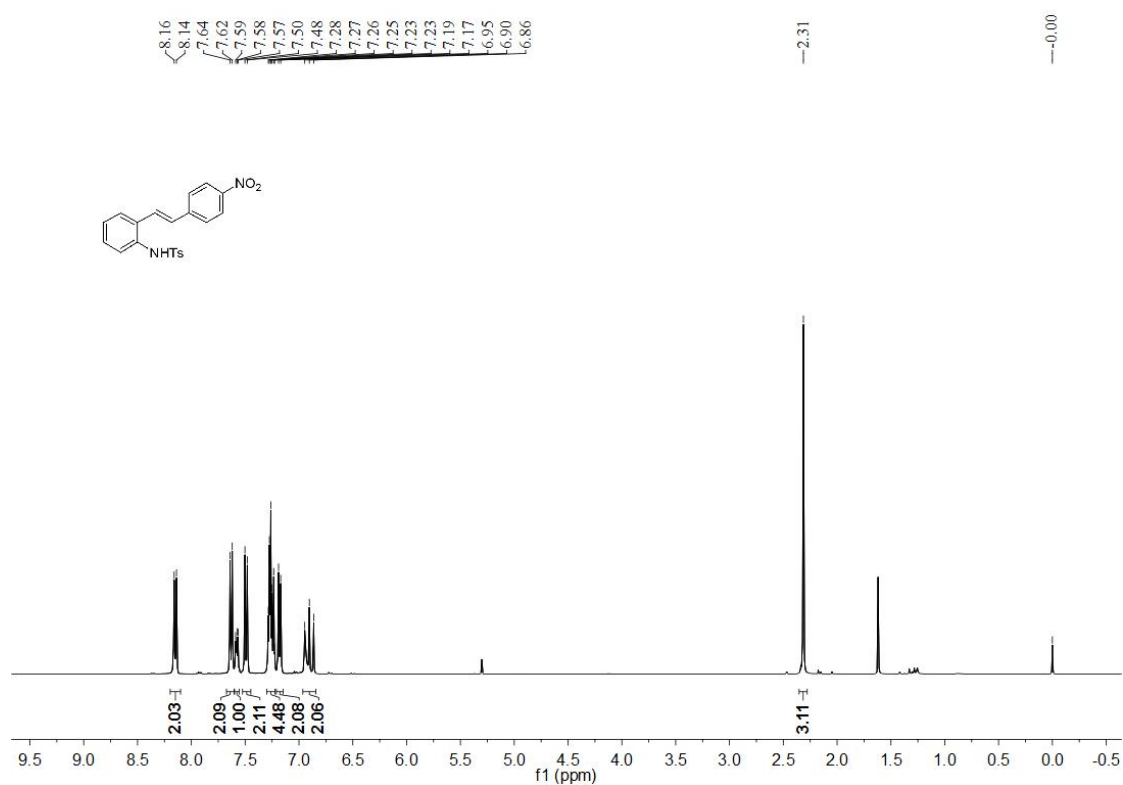

# NMR Spectra of Substrate 1q

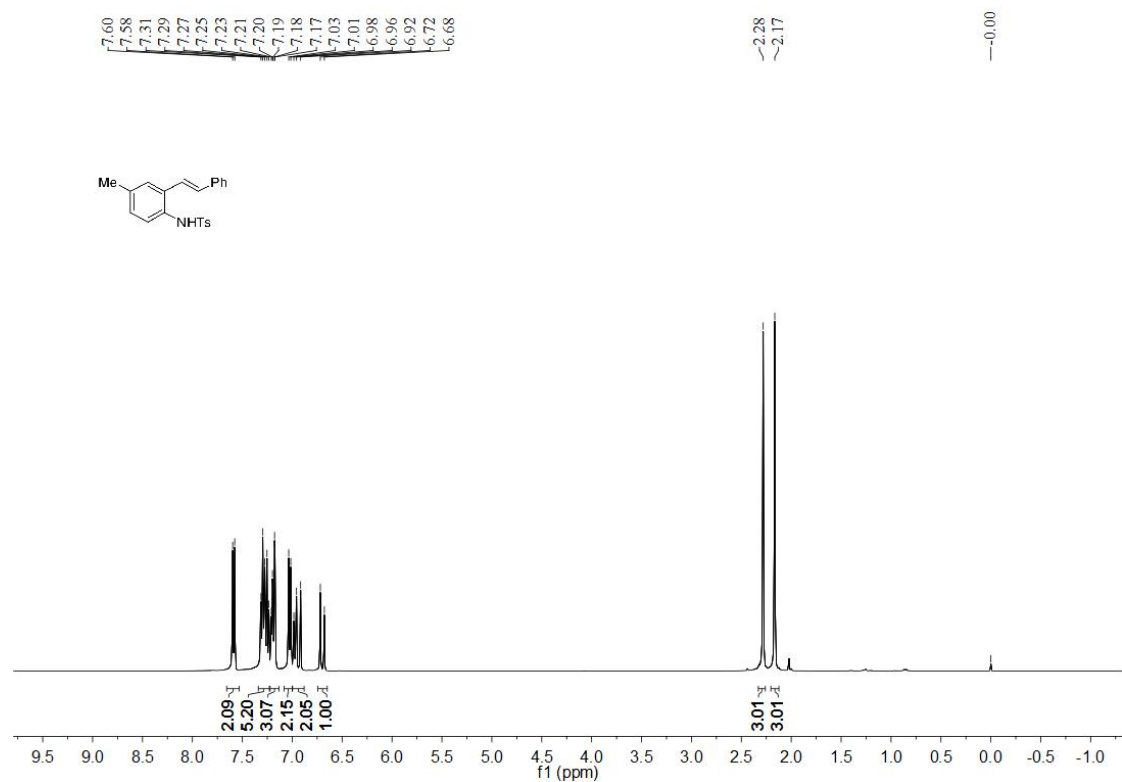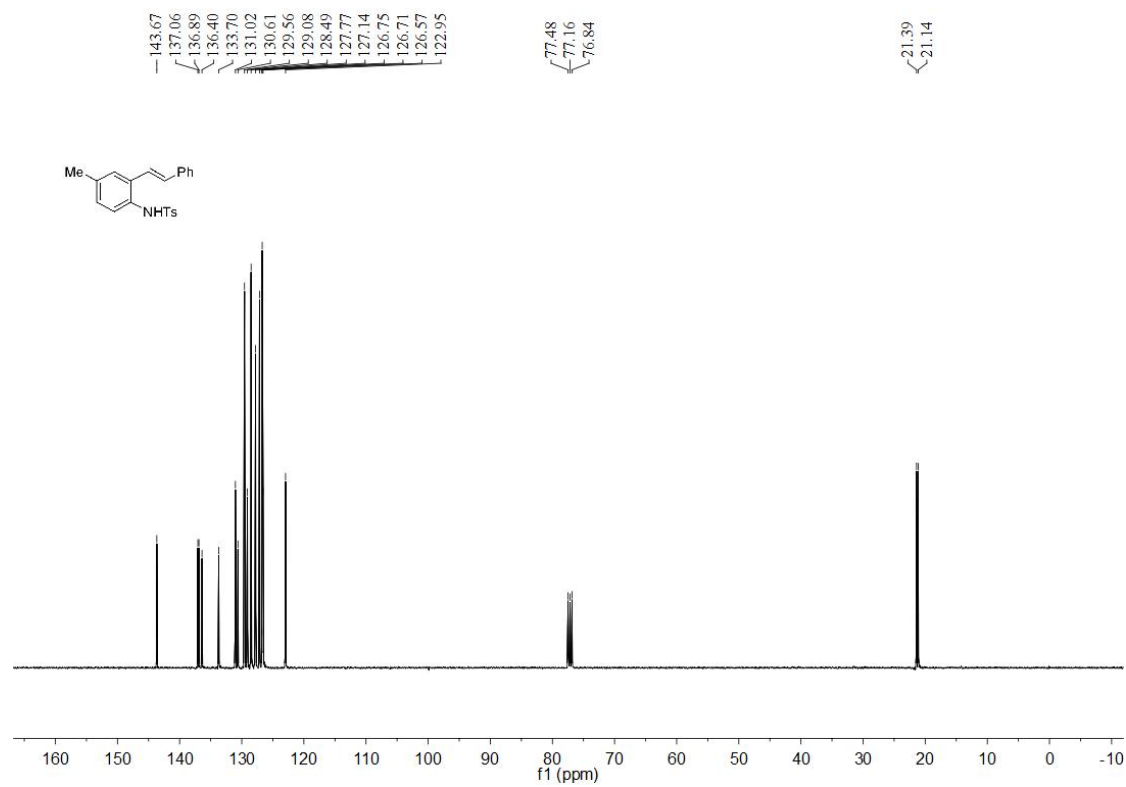



# NMR Spectra of Substrate 1r

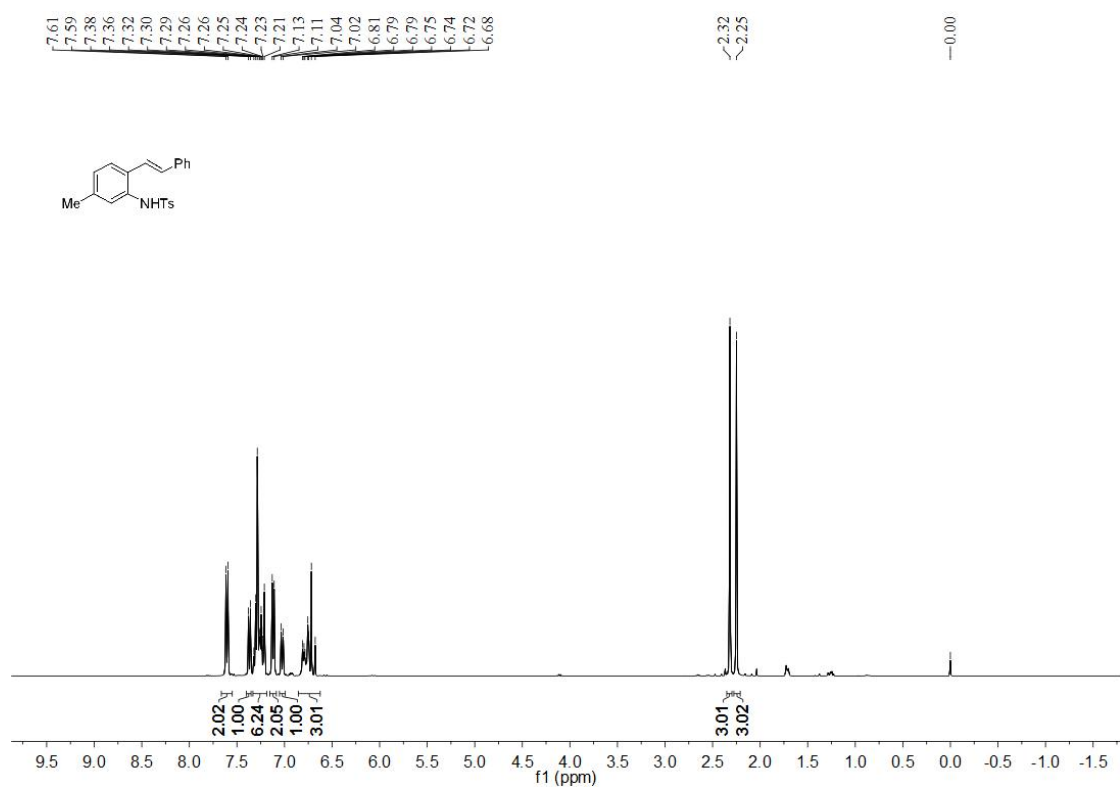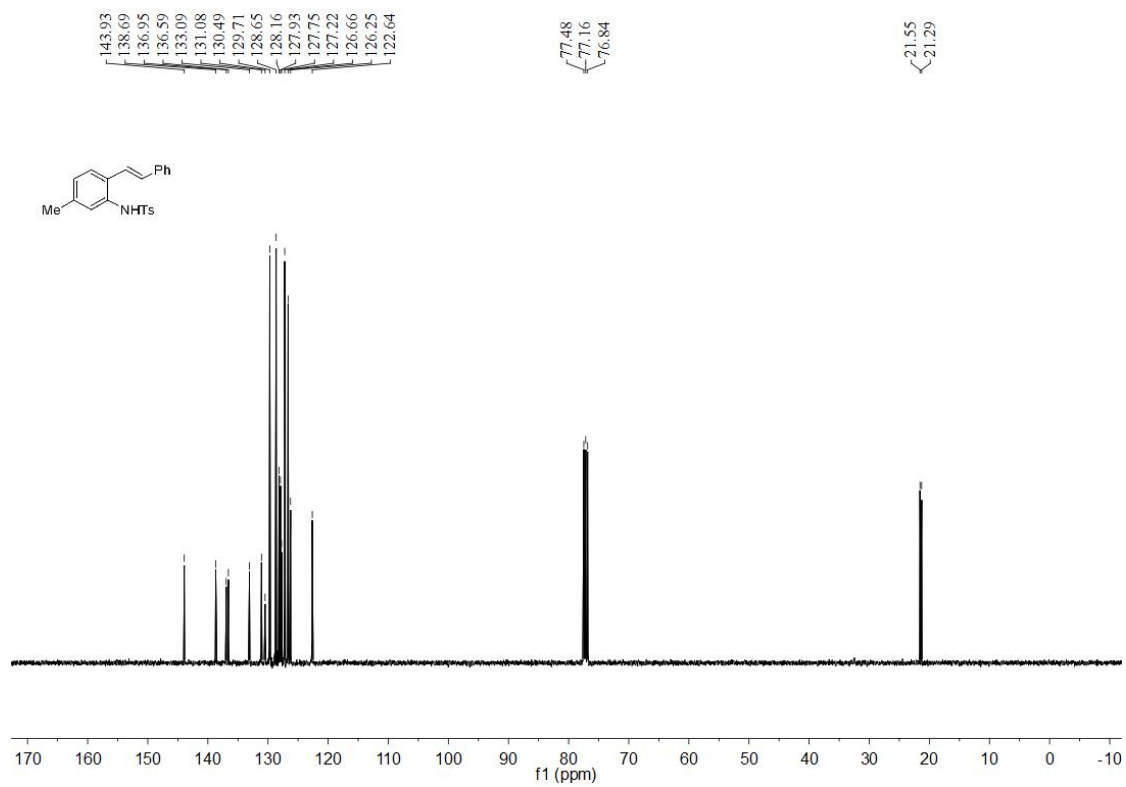

# NMR Spectra of Substrate 1s

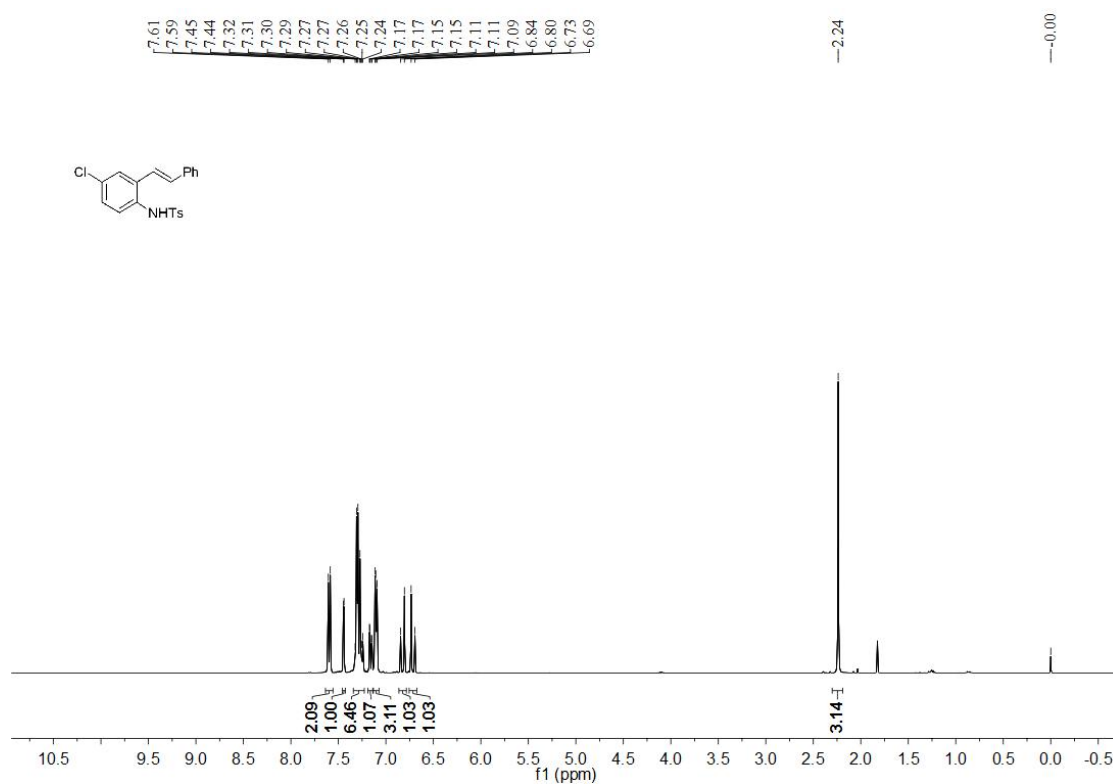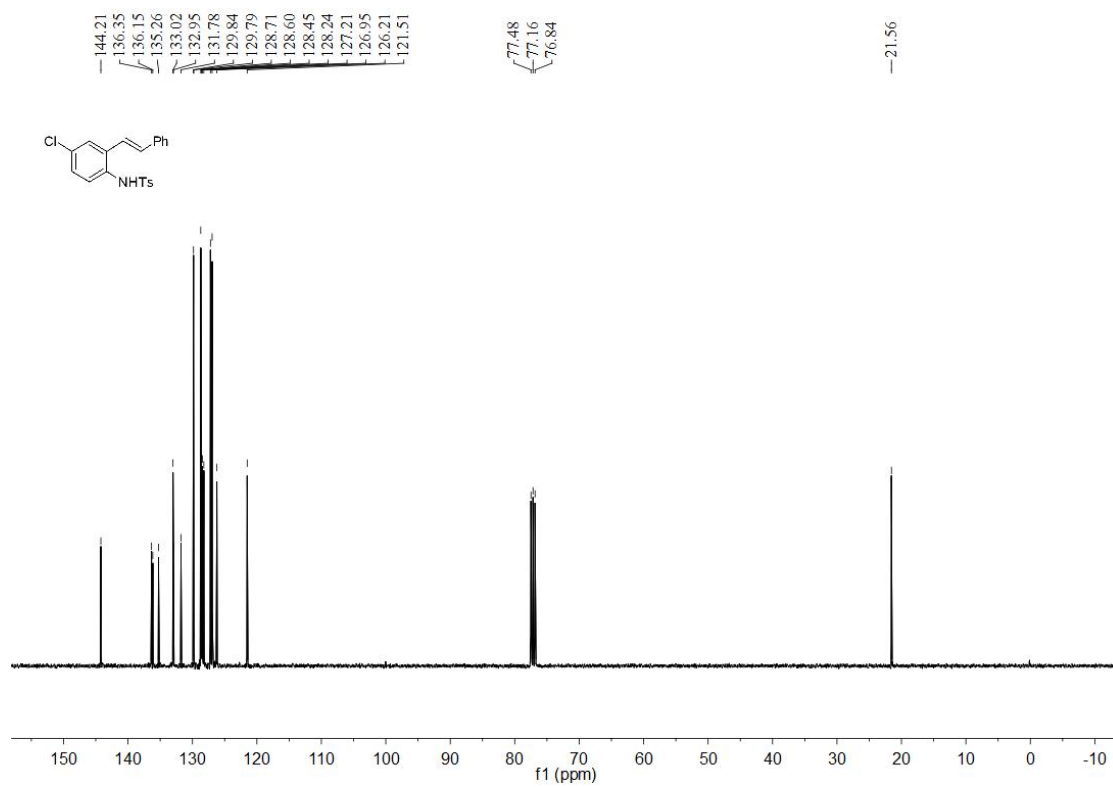

# NMR Spectra of Substrate 1t

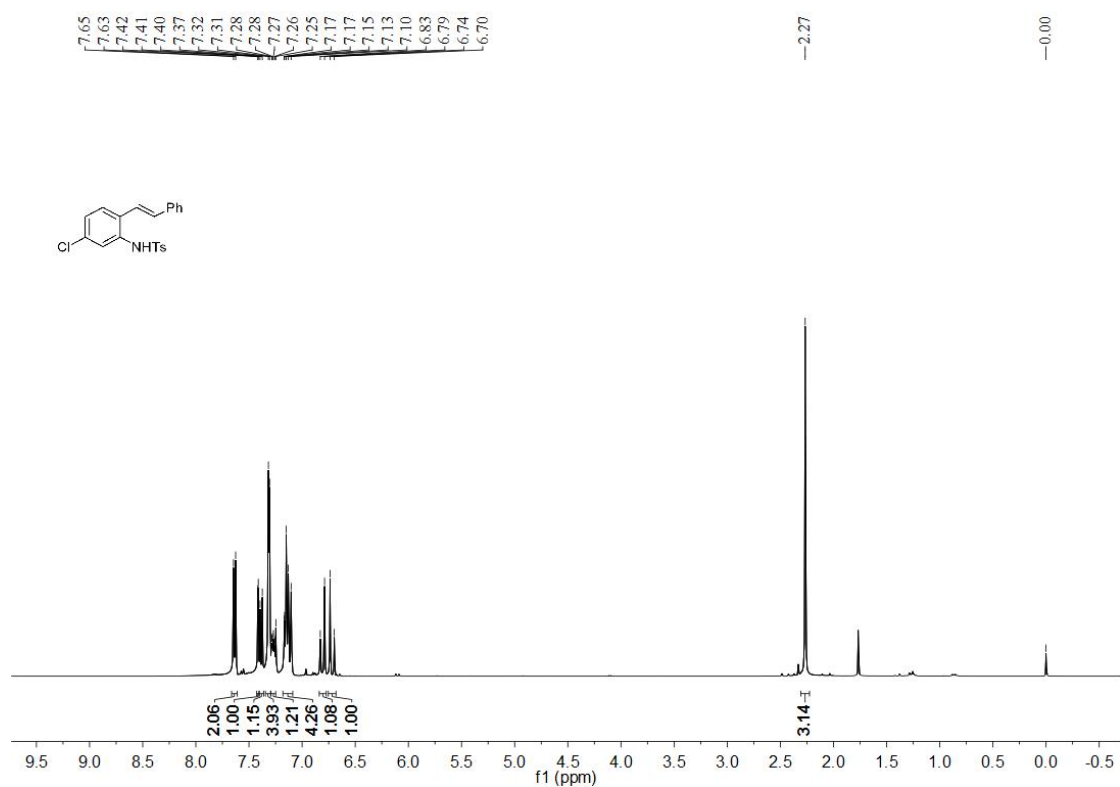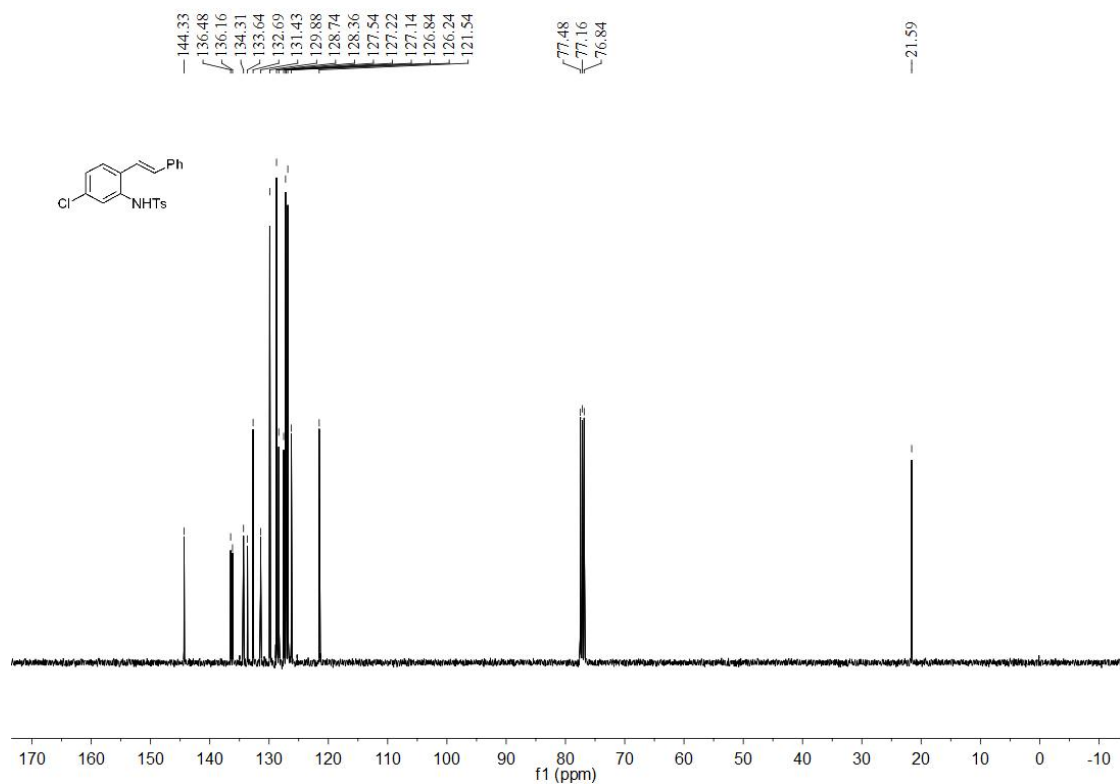

## NMR Spectra of Substrate 1u

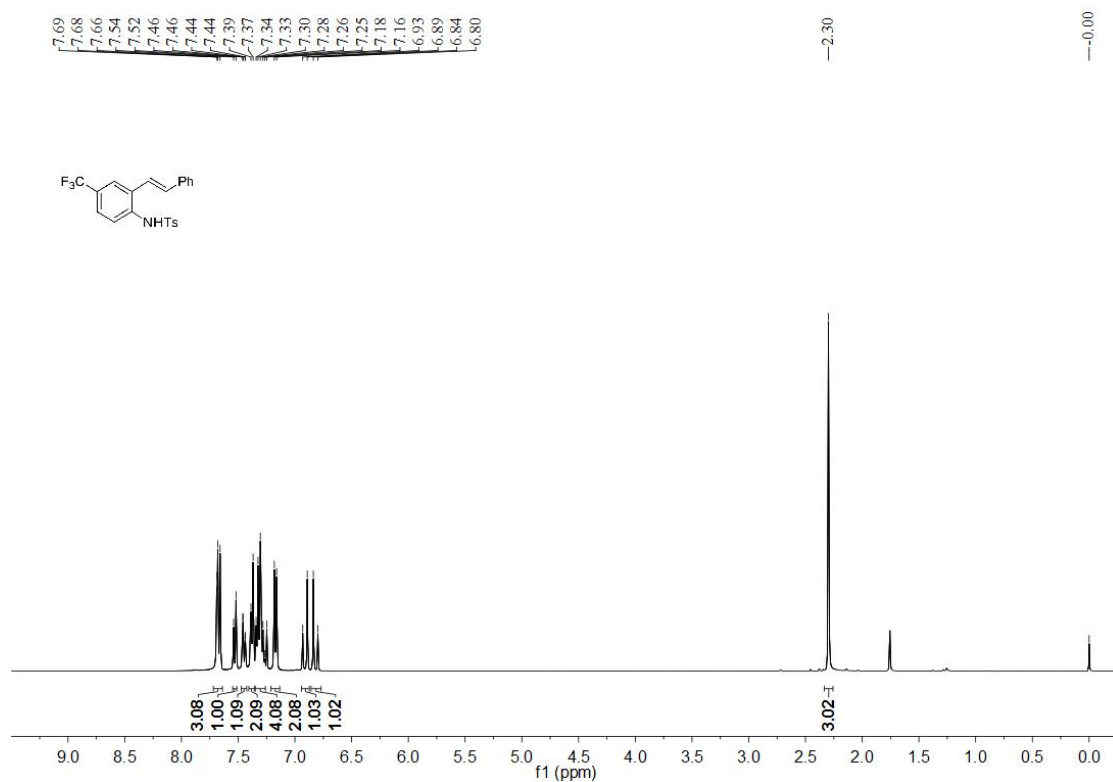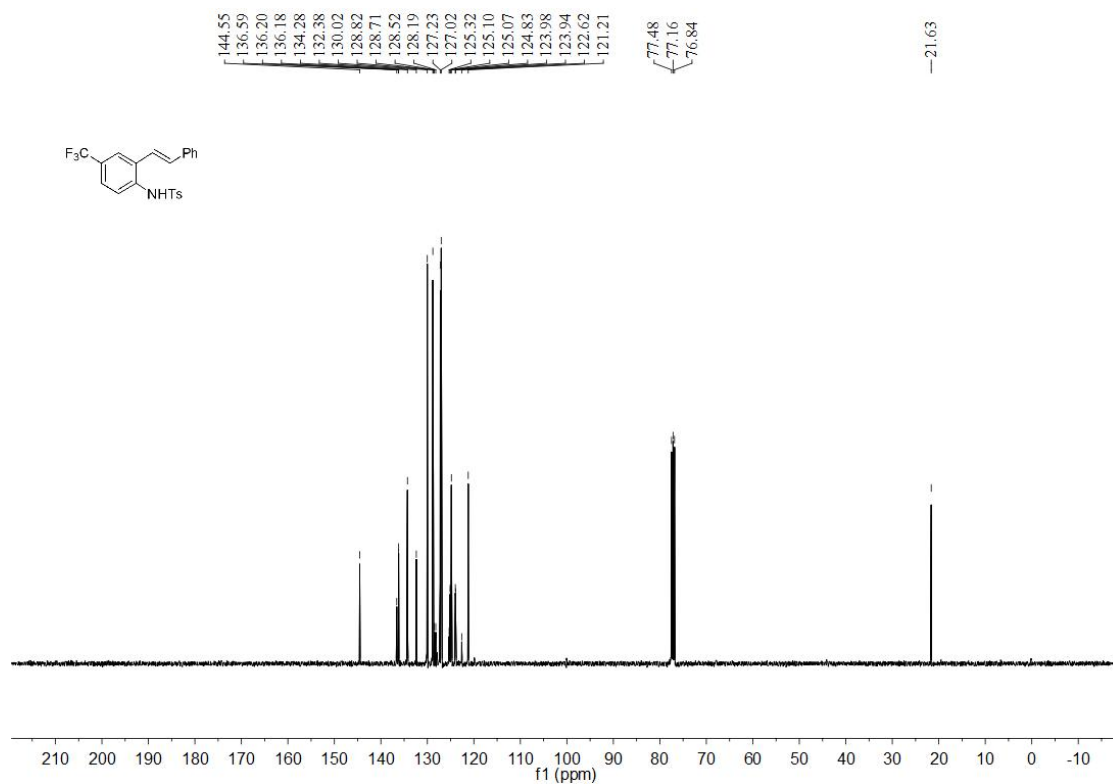

# NMR Spectra of Substrate 1v

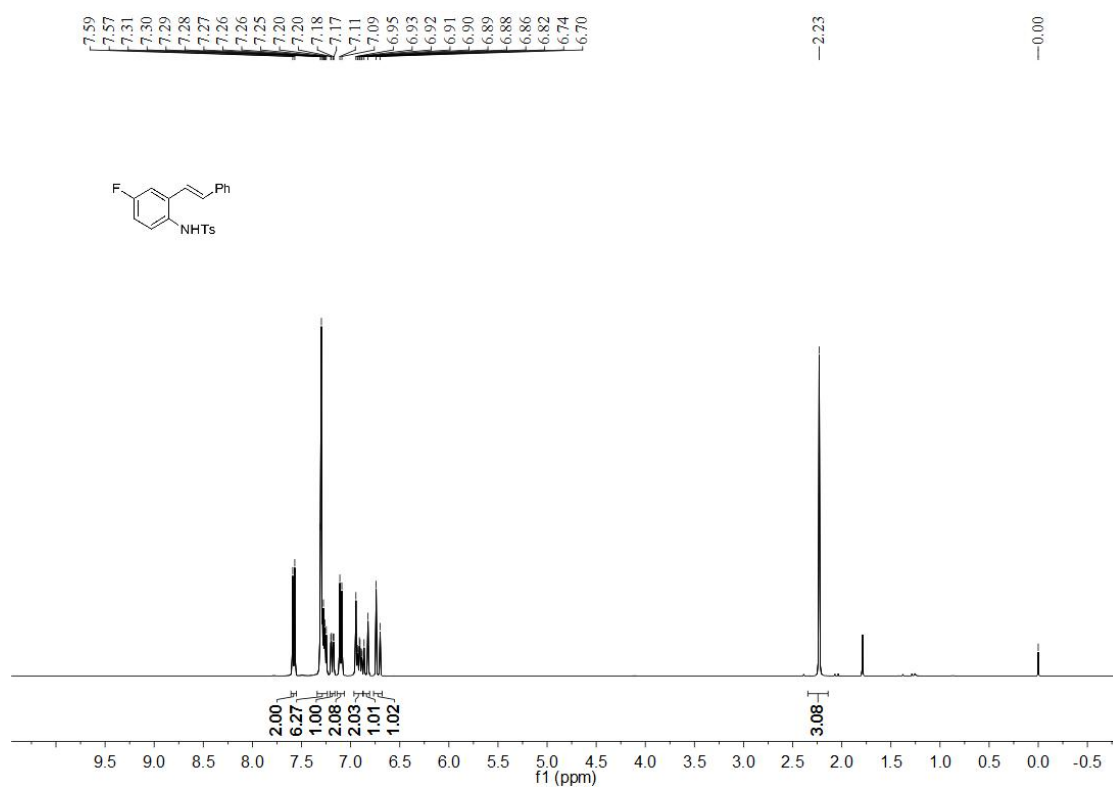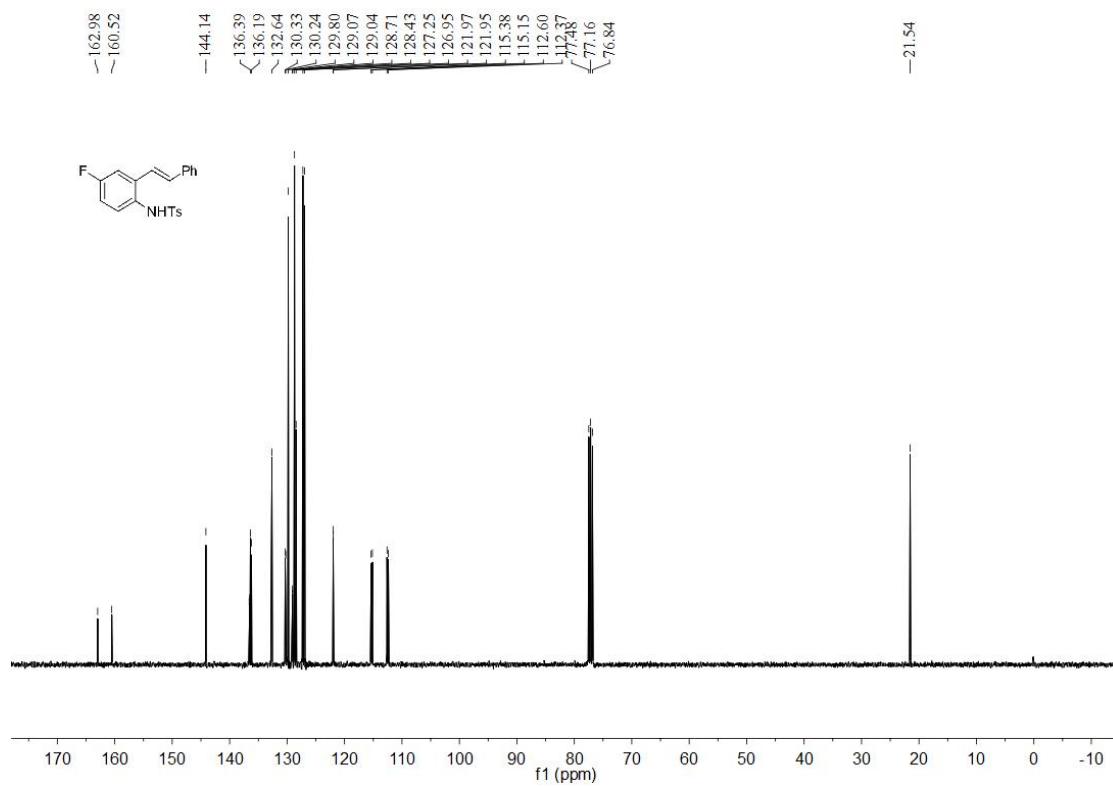

# NMR Spectrum of Substrate 3

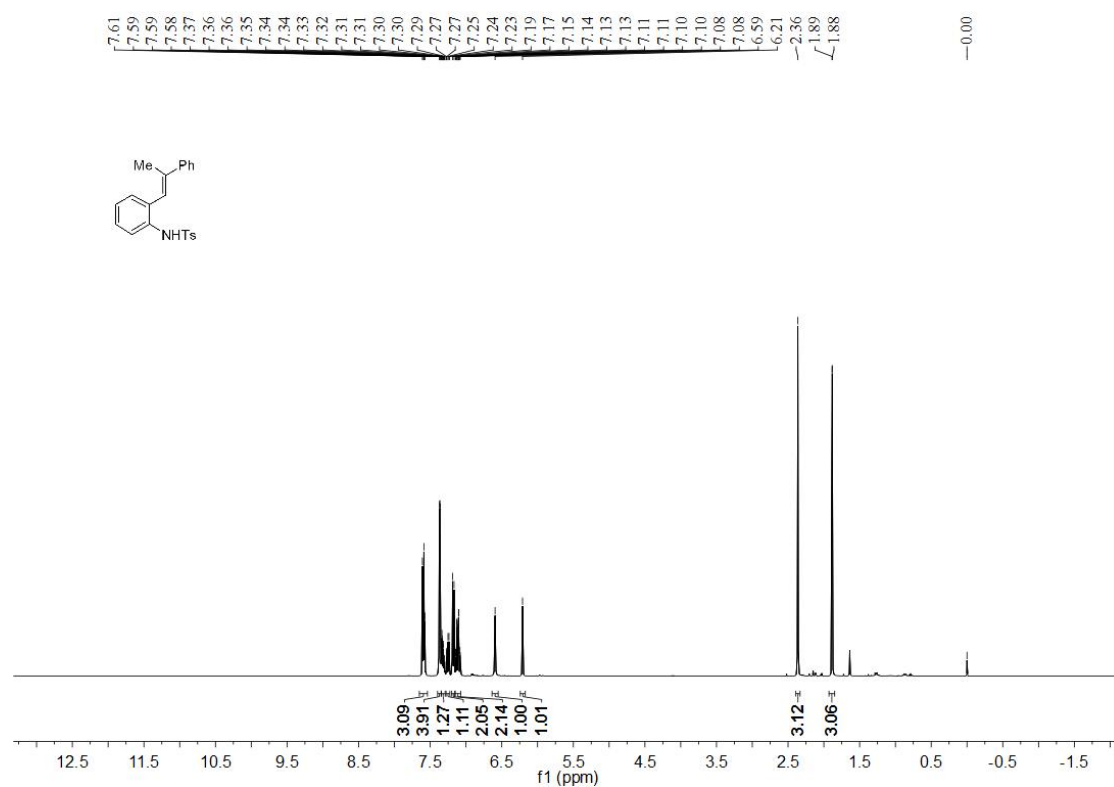

## NMR Spectra of Product 2a

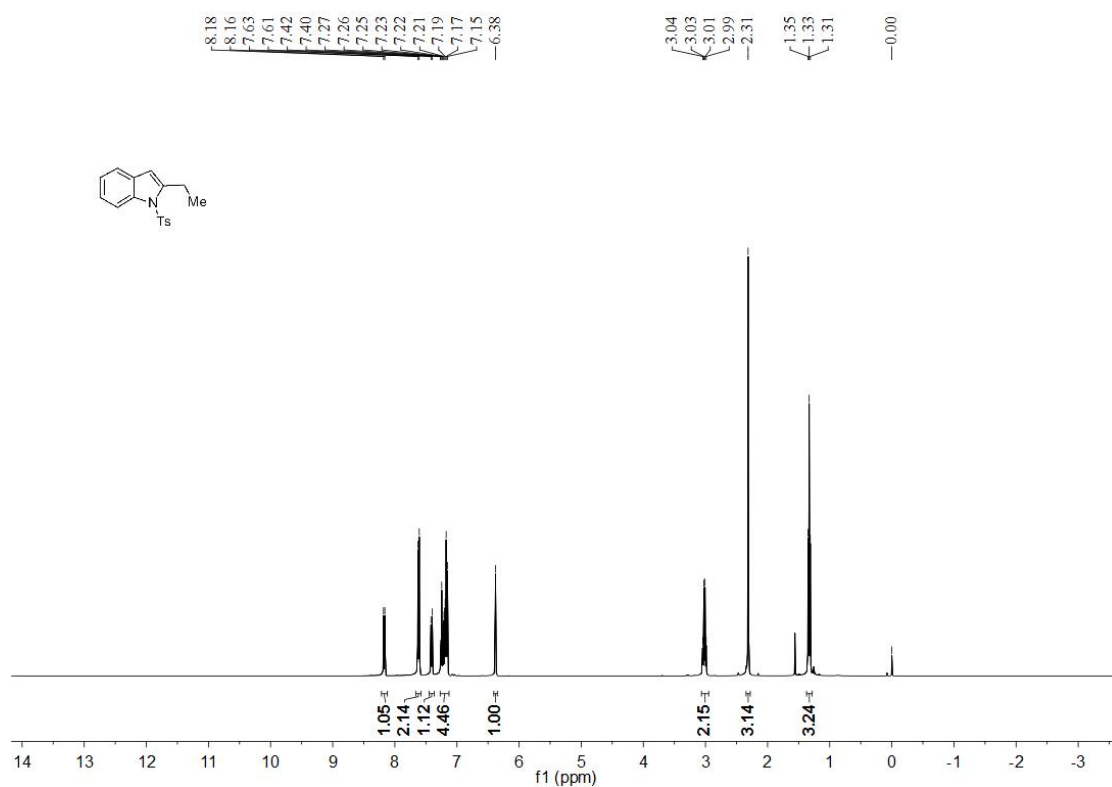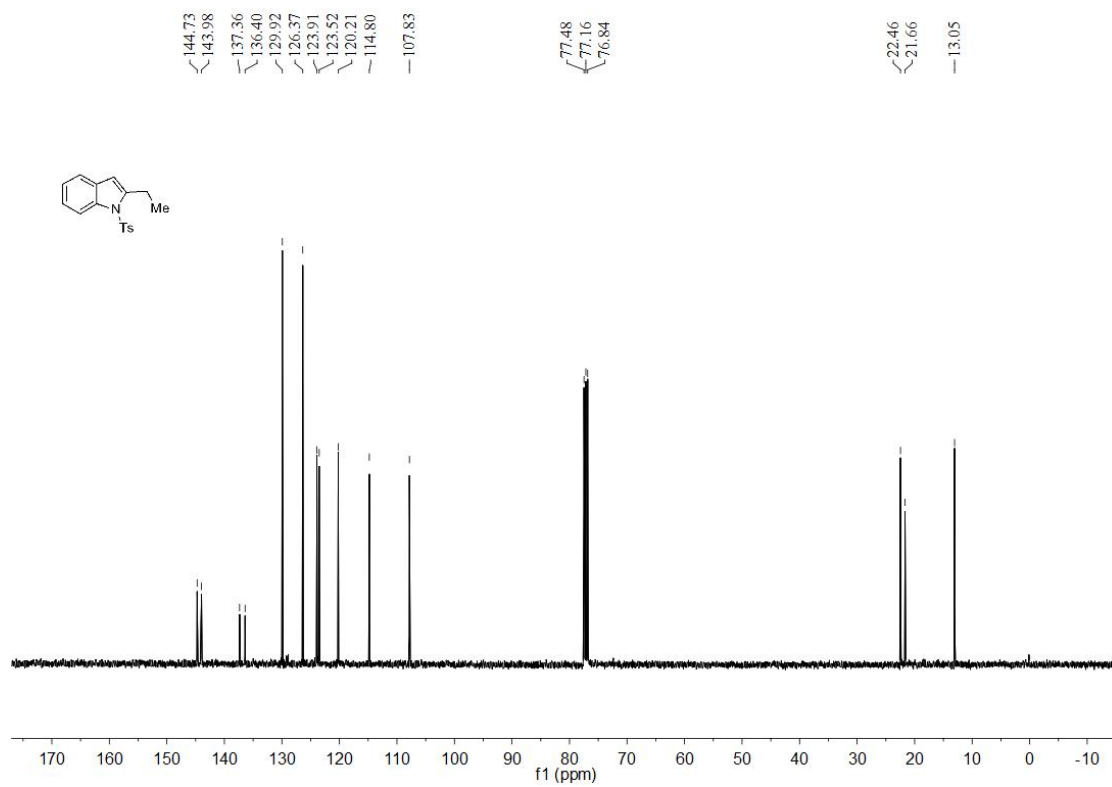

# NMR Spectra of Product 2b

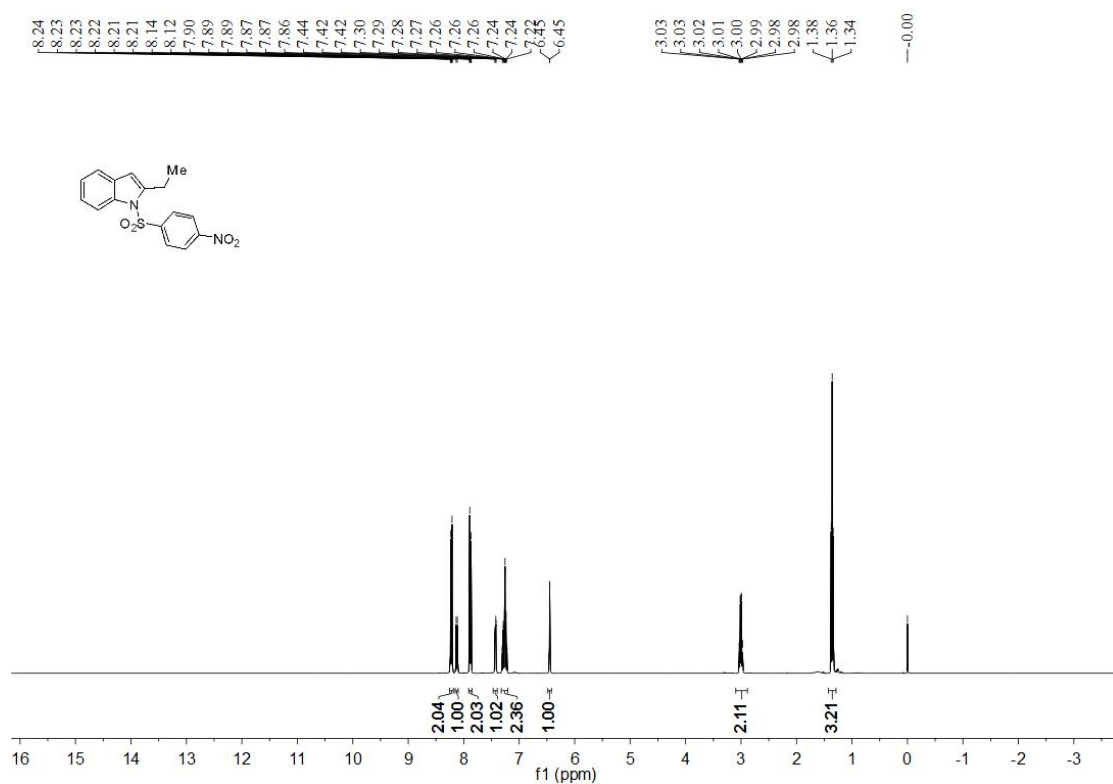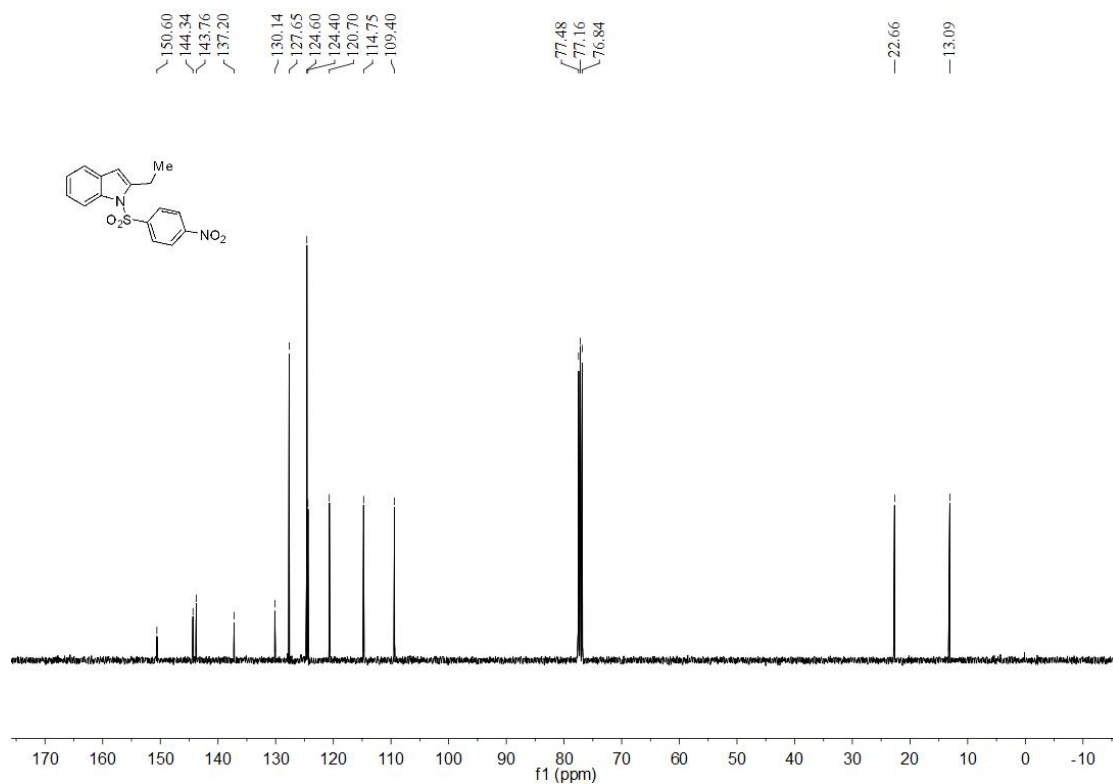



## NMR Spectra of Product 2c

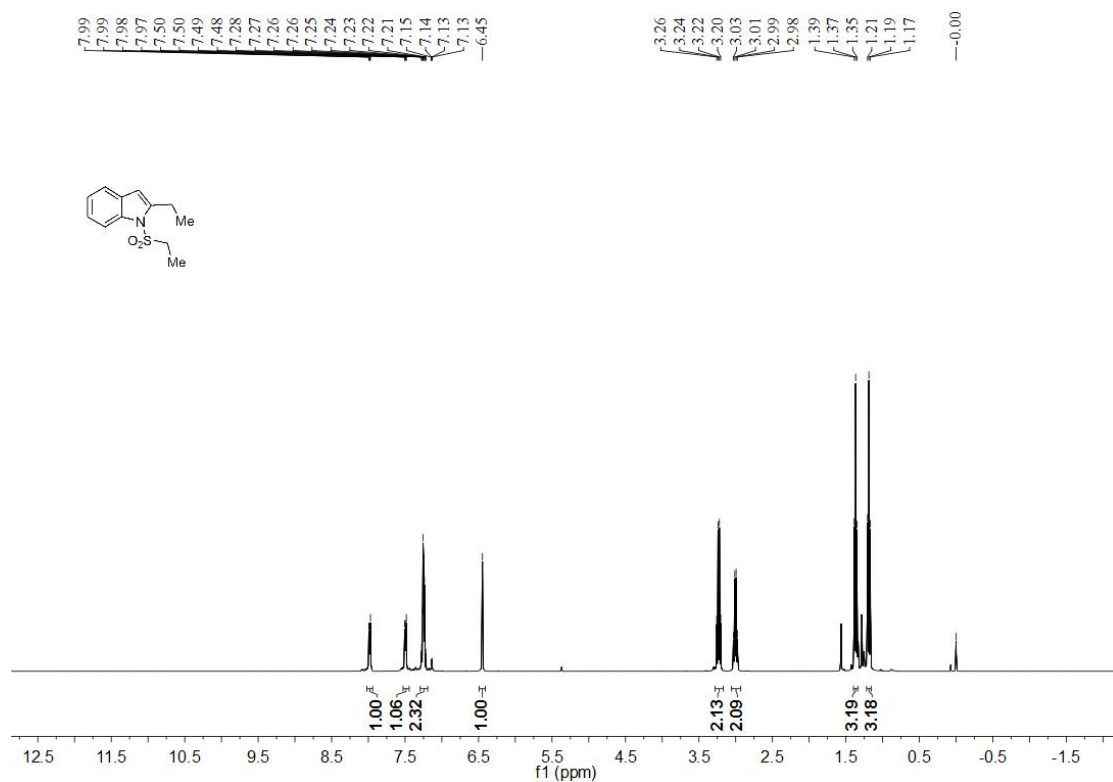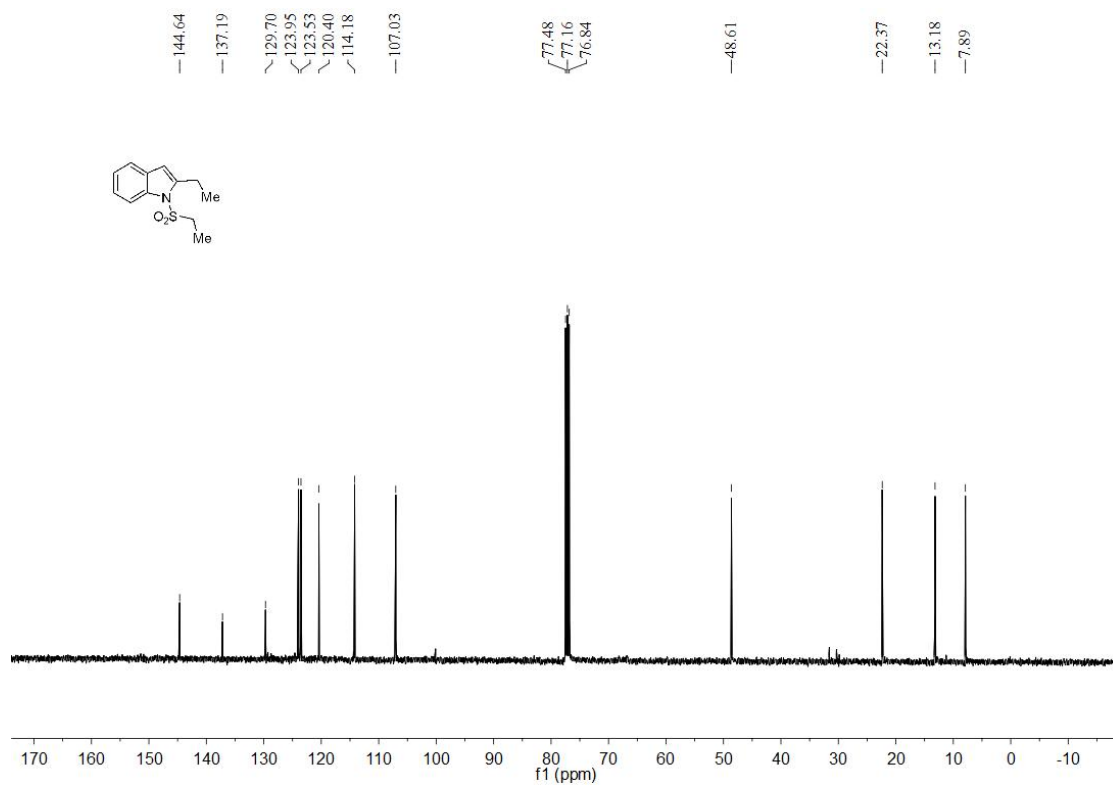

## NMR Spectra of Product 2e

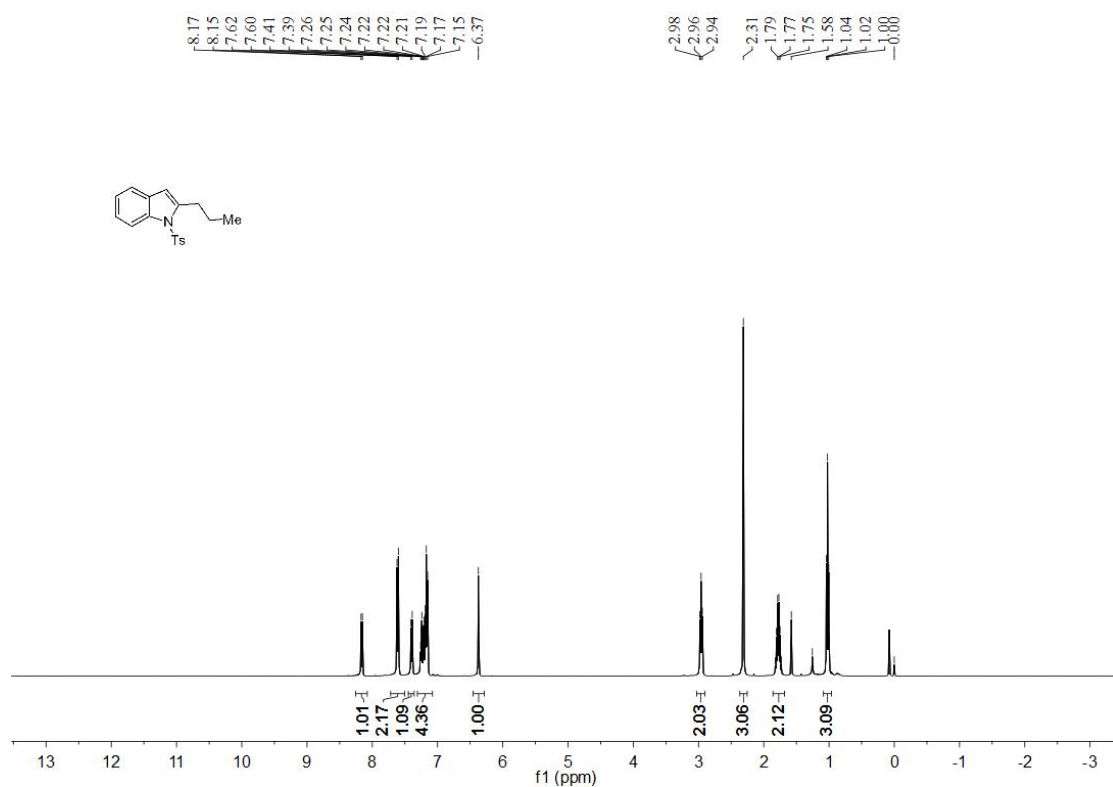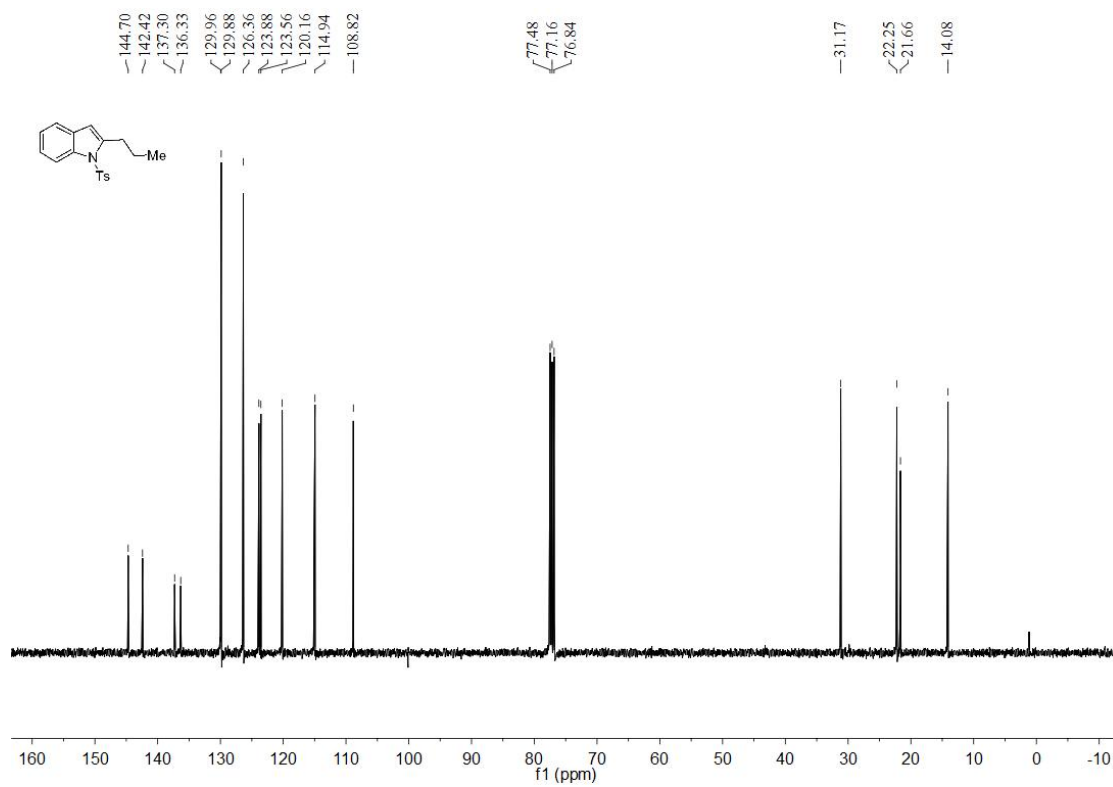

## NMR Spectra of Product 2f

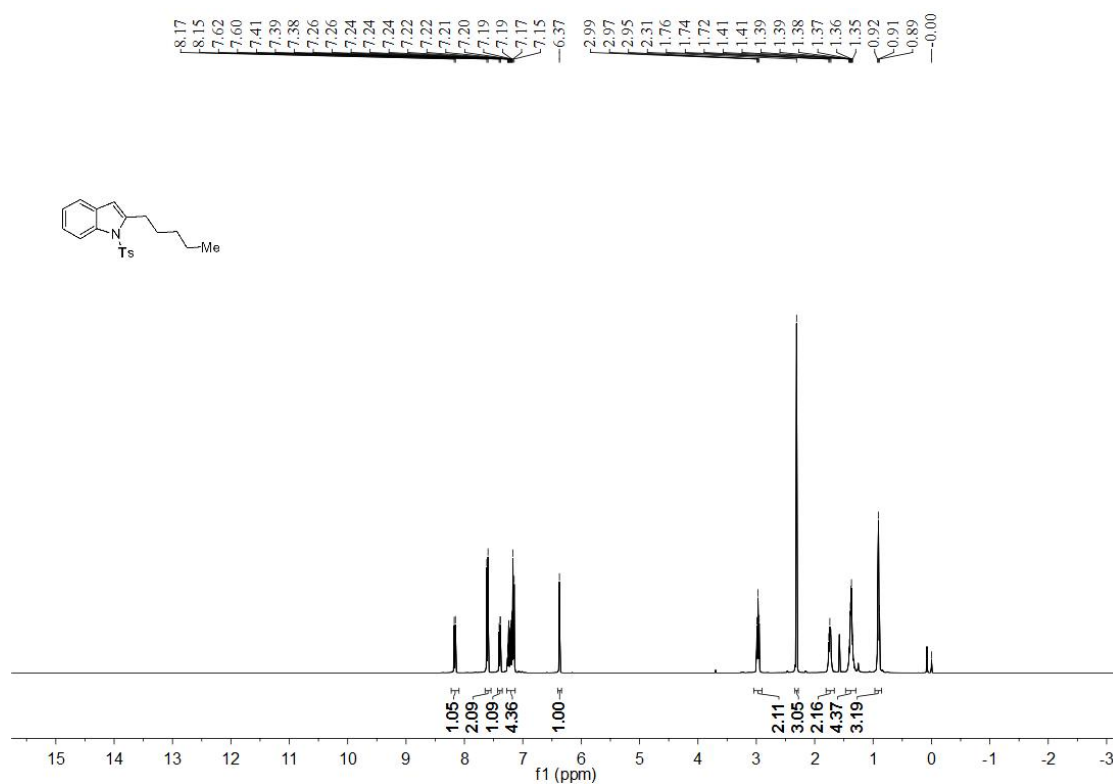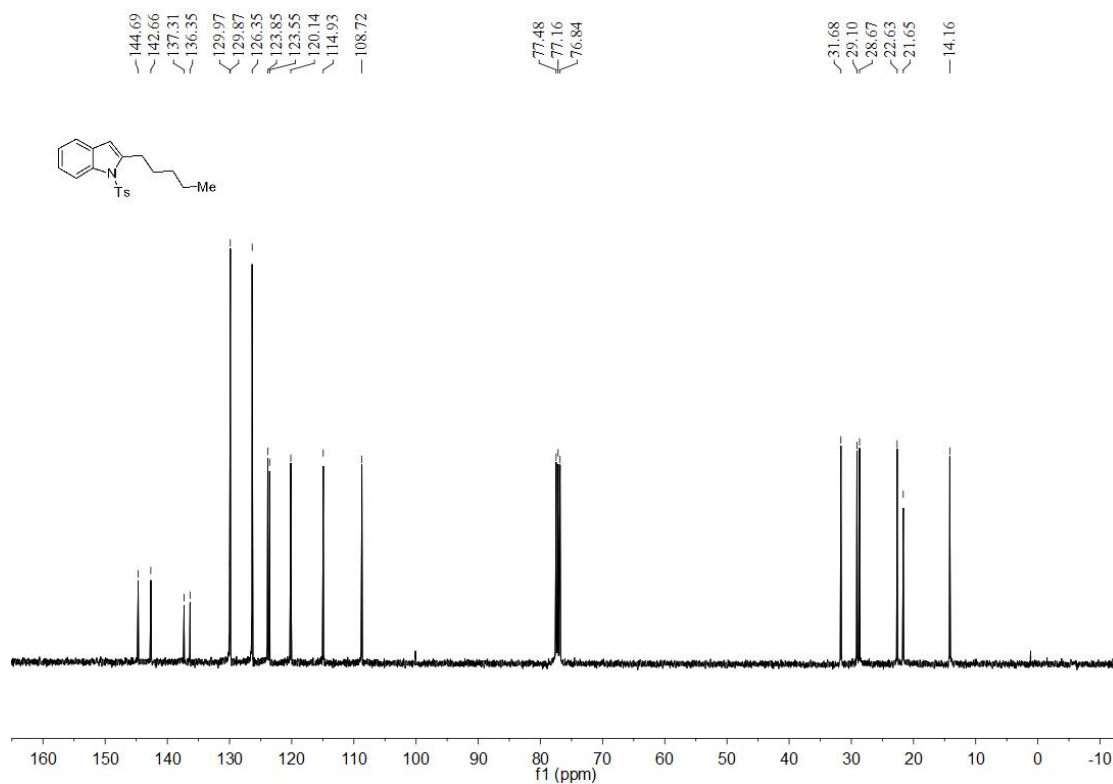

# NMR Spectra of Product 2g

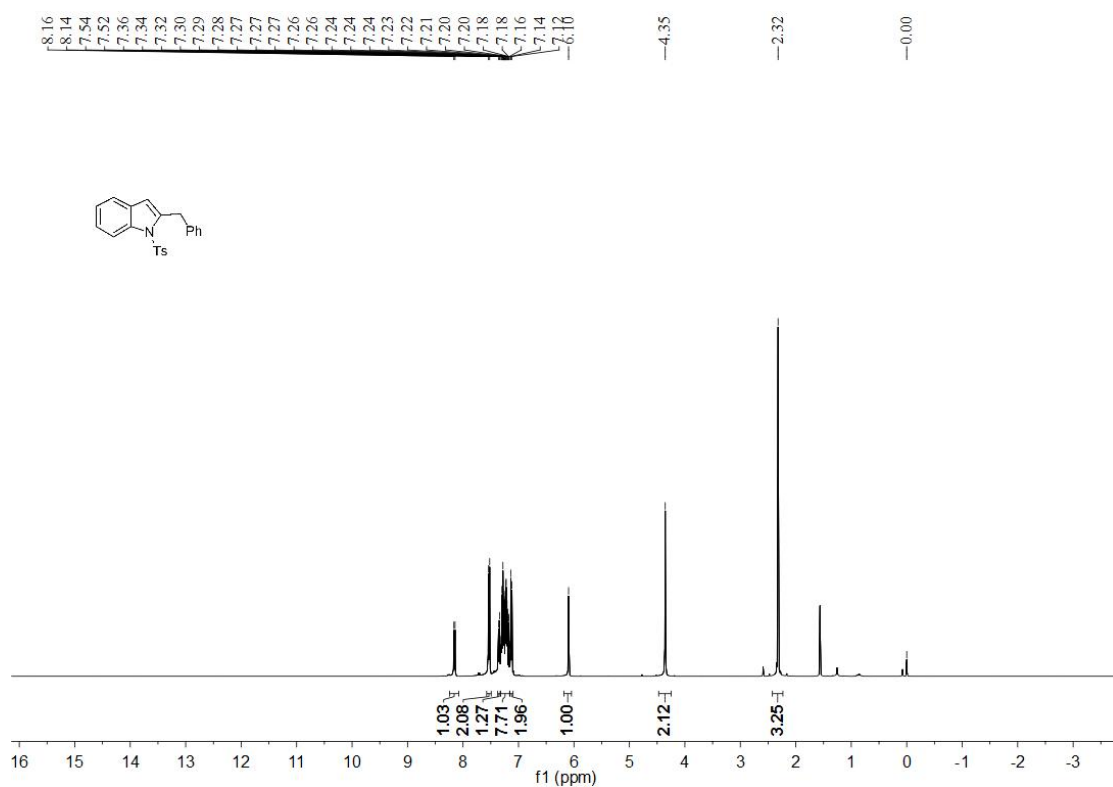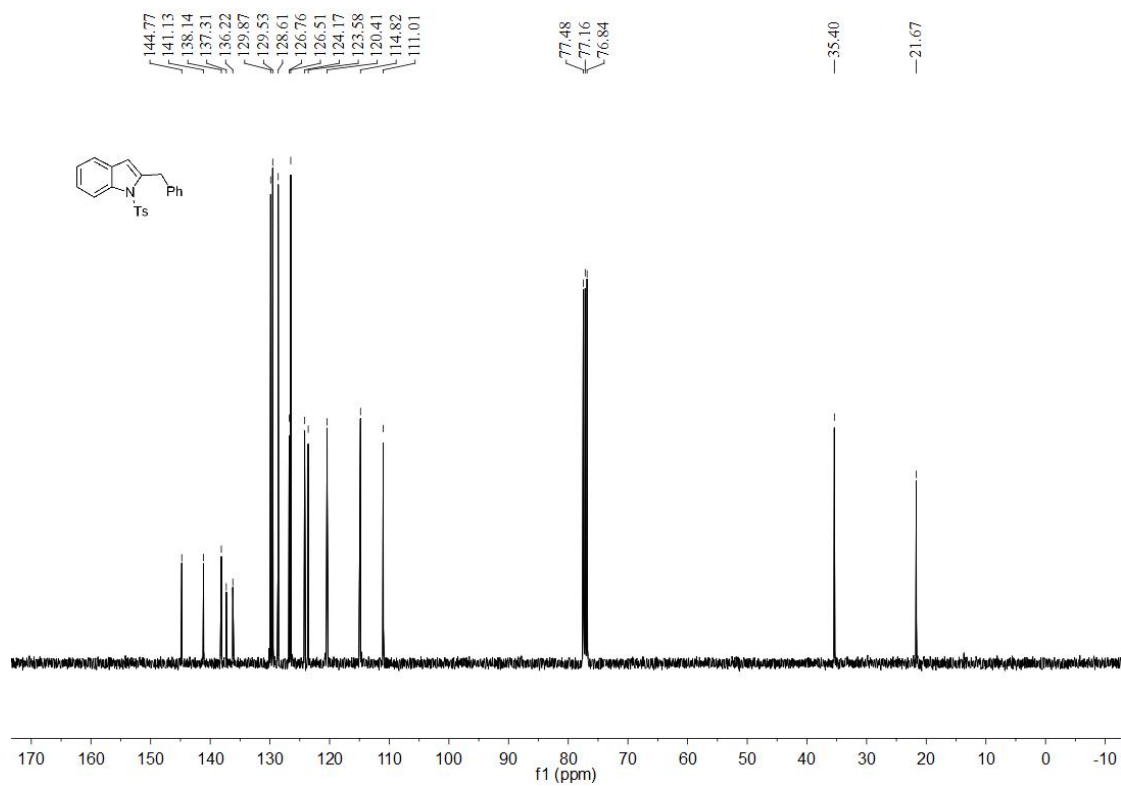

# NMR Spectra of Product 2h

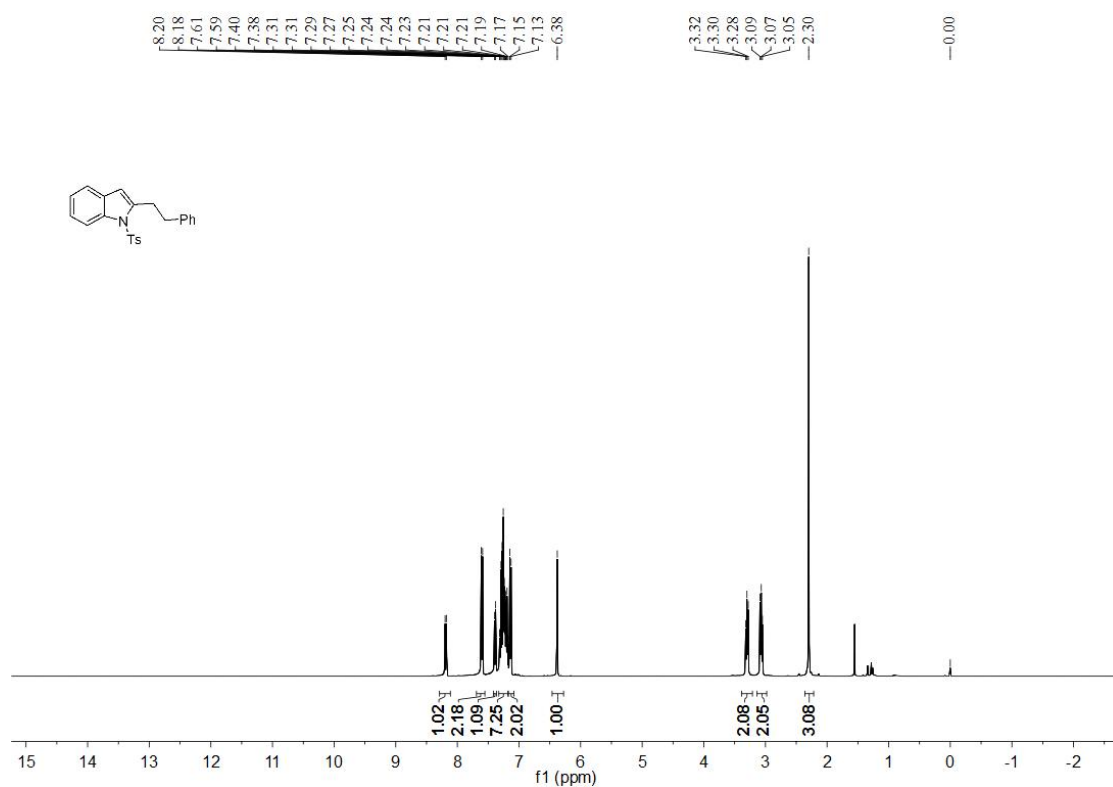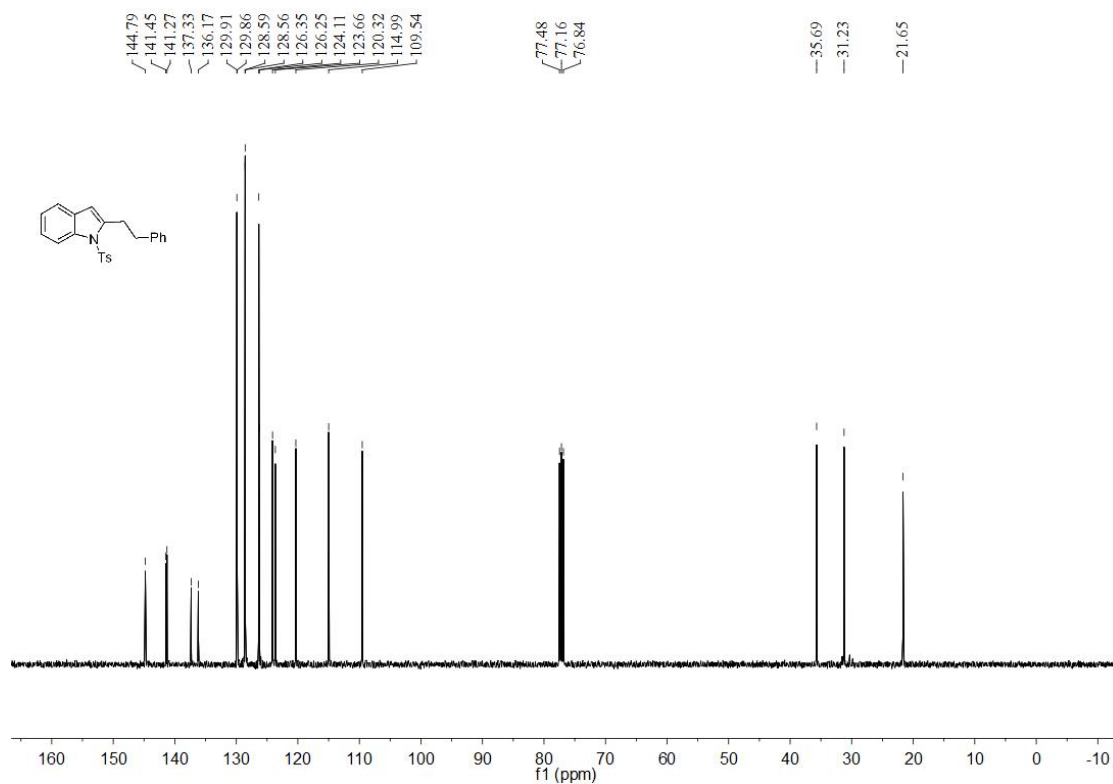

## NMR Spectra of Product 2i

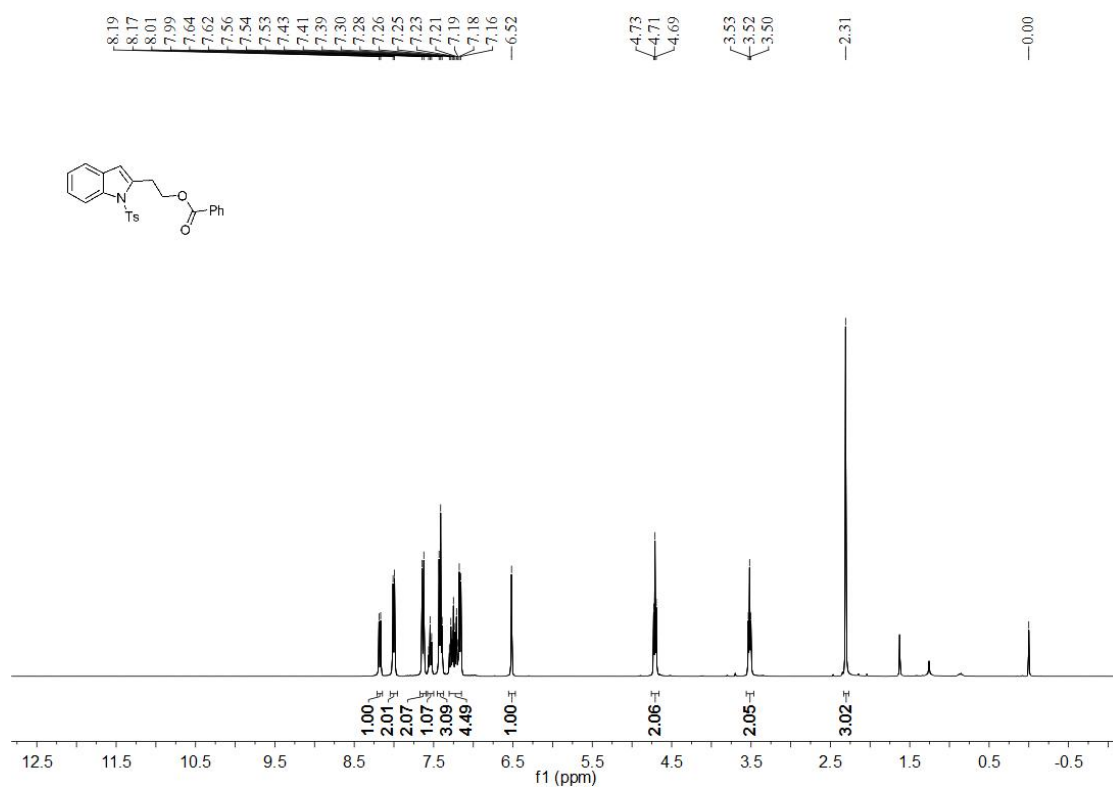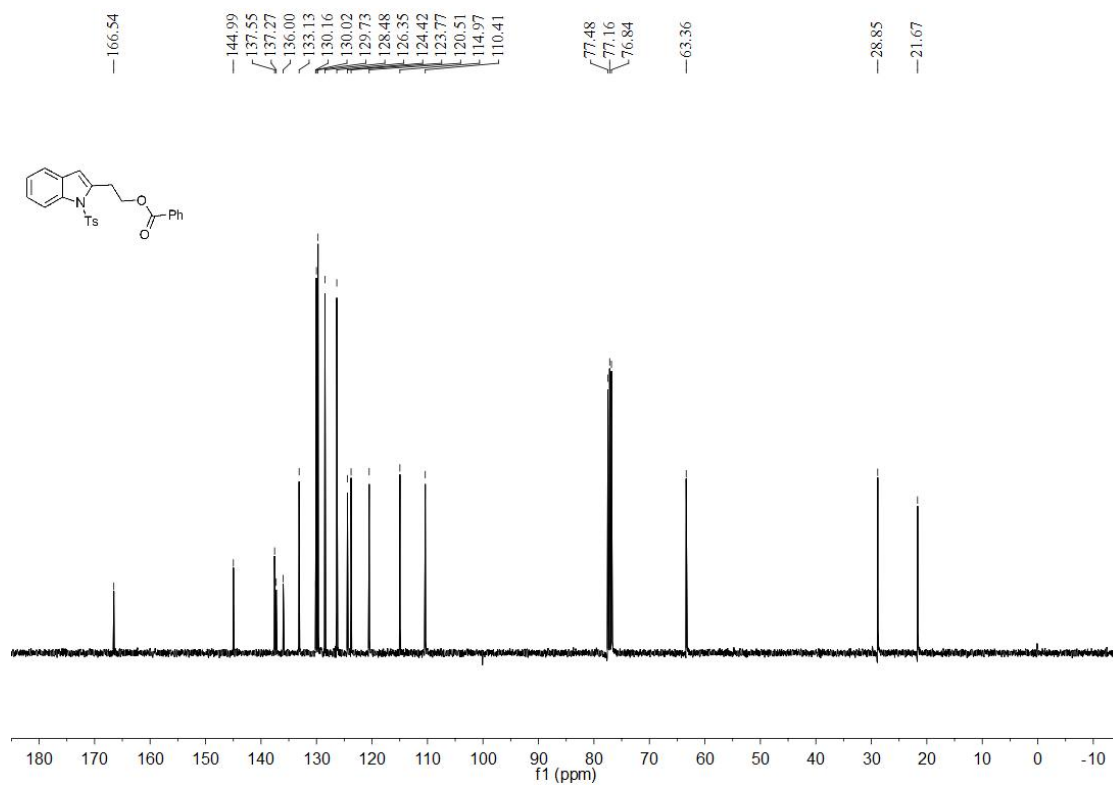

# NMR Spectra of Product 2j

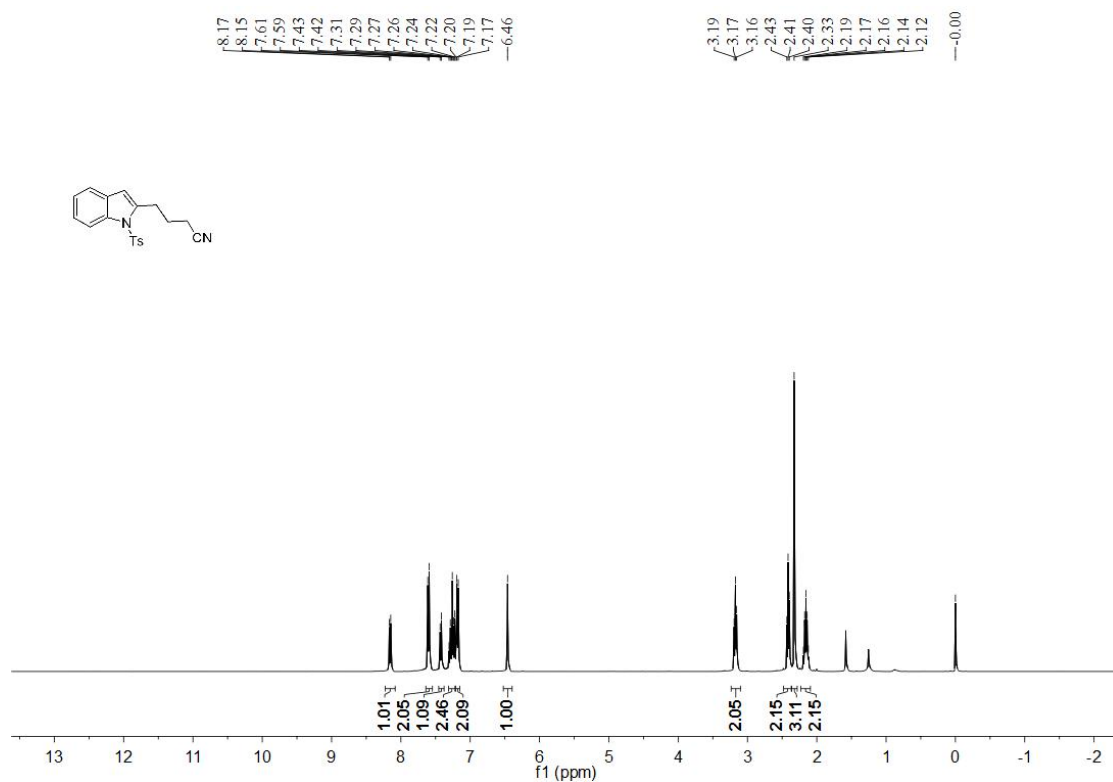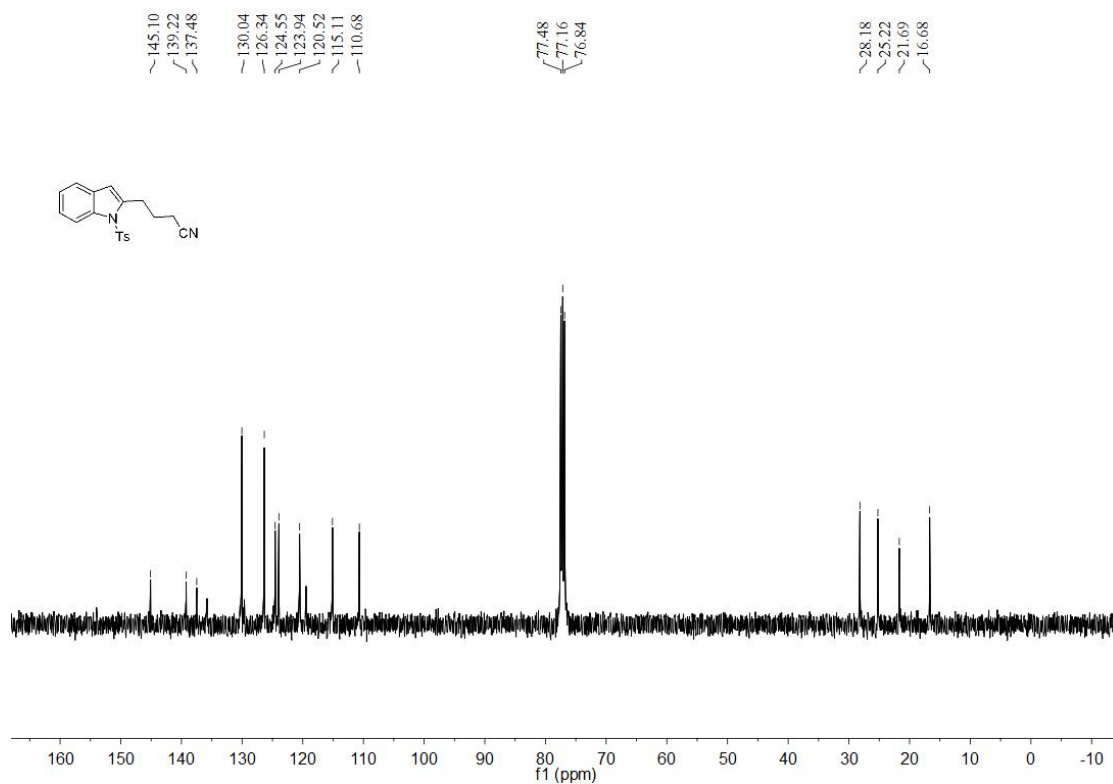

# NMR Spectra of Product 2k

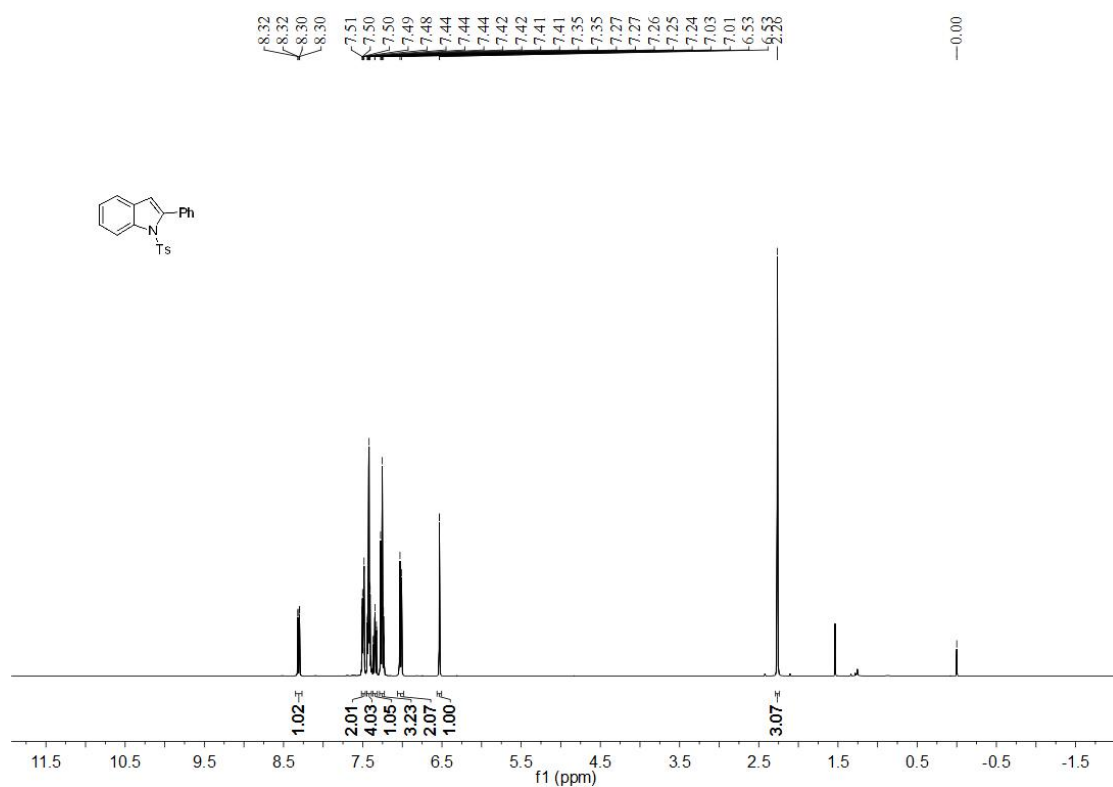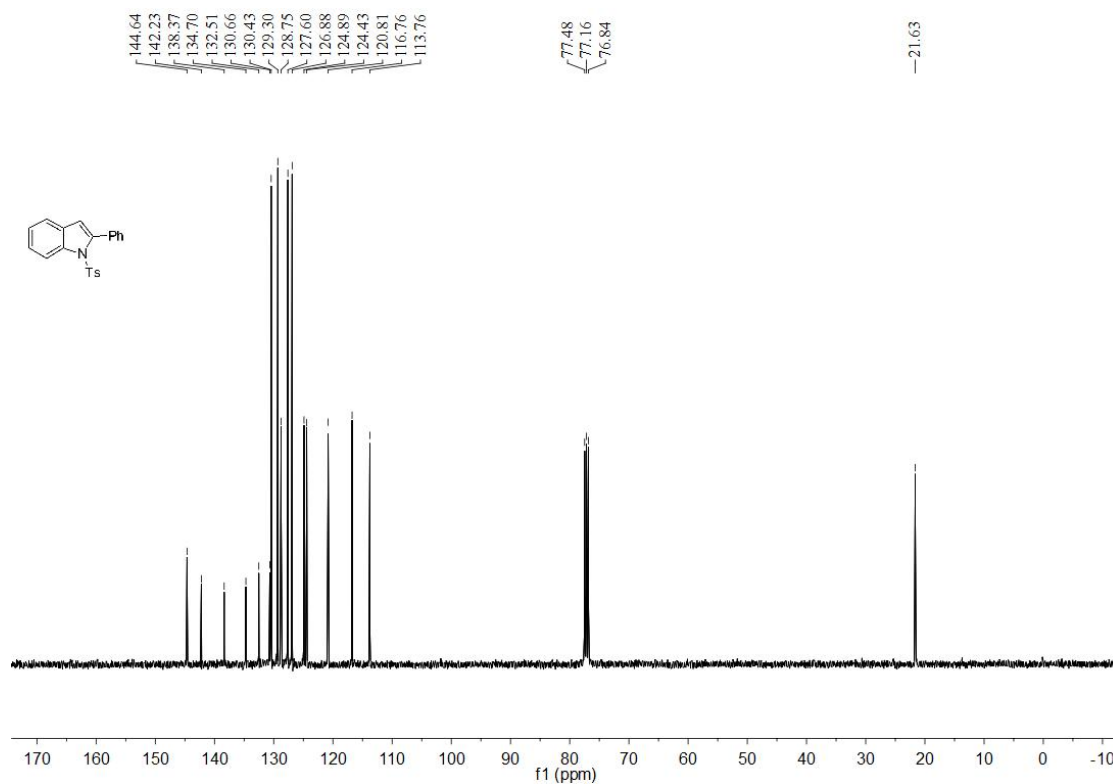



# NMR Spectra of Product 2l

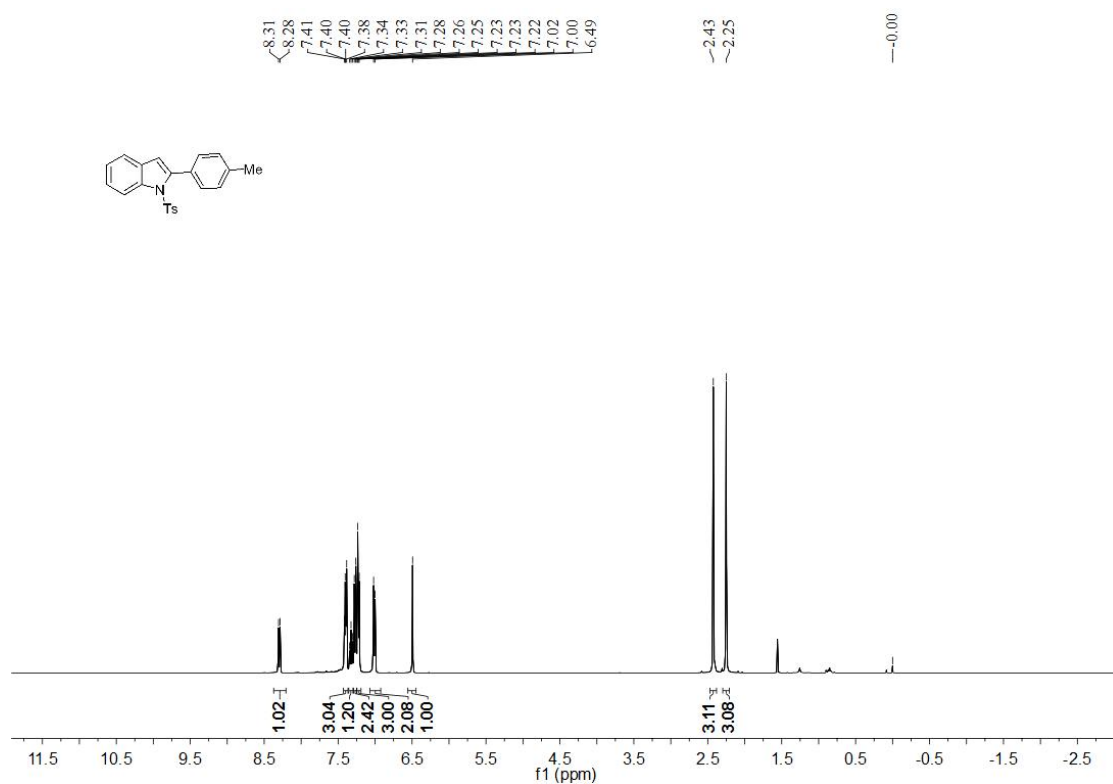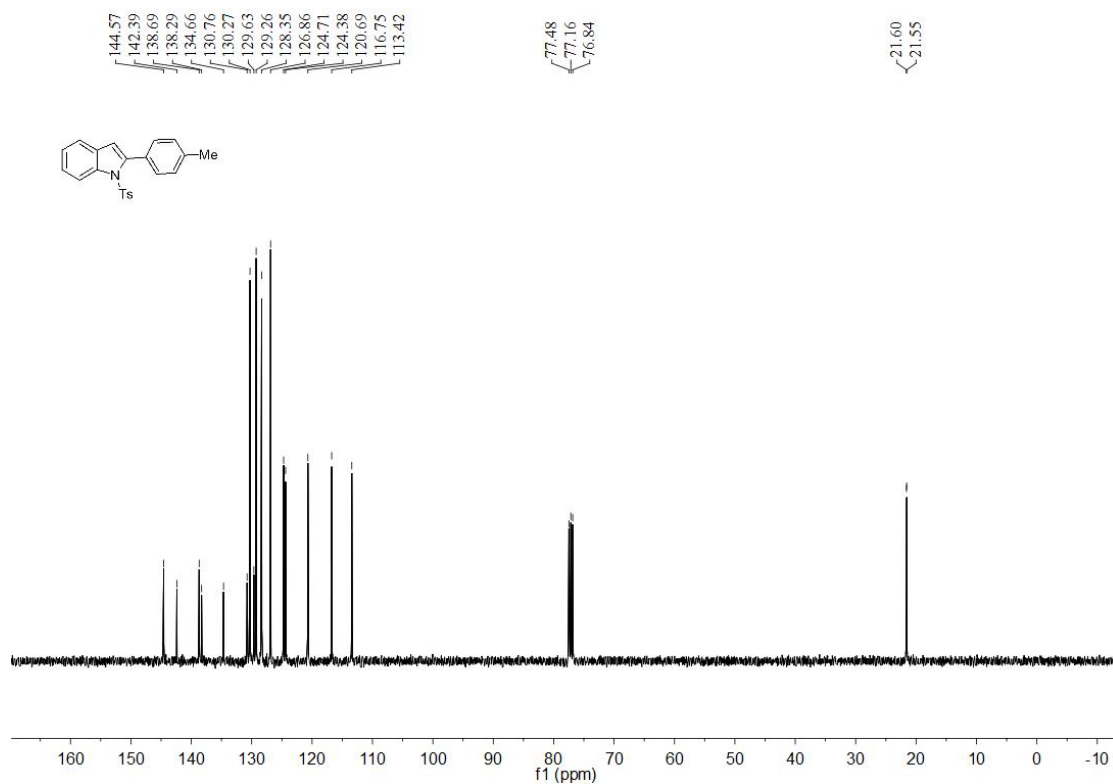

# NMR Spectra of Product 2m

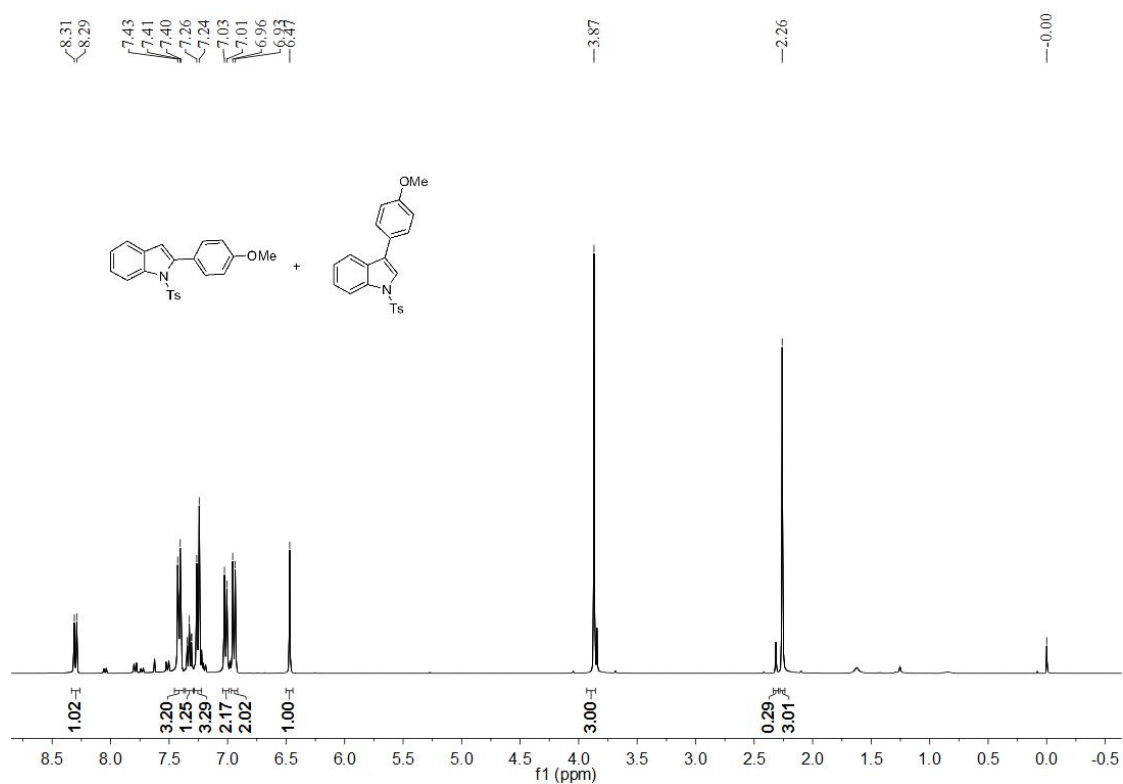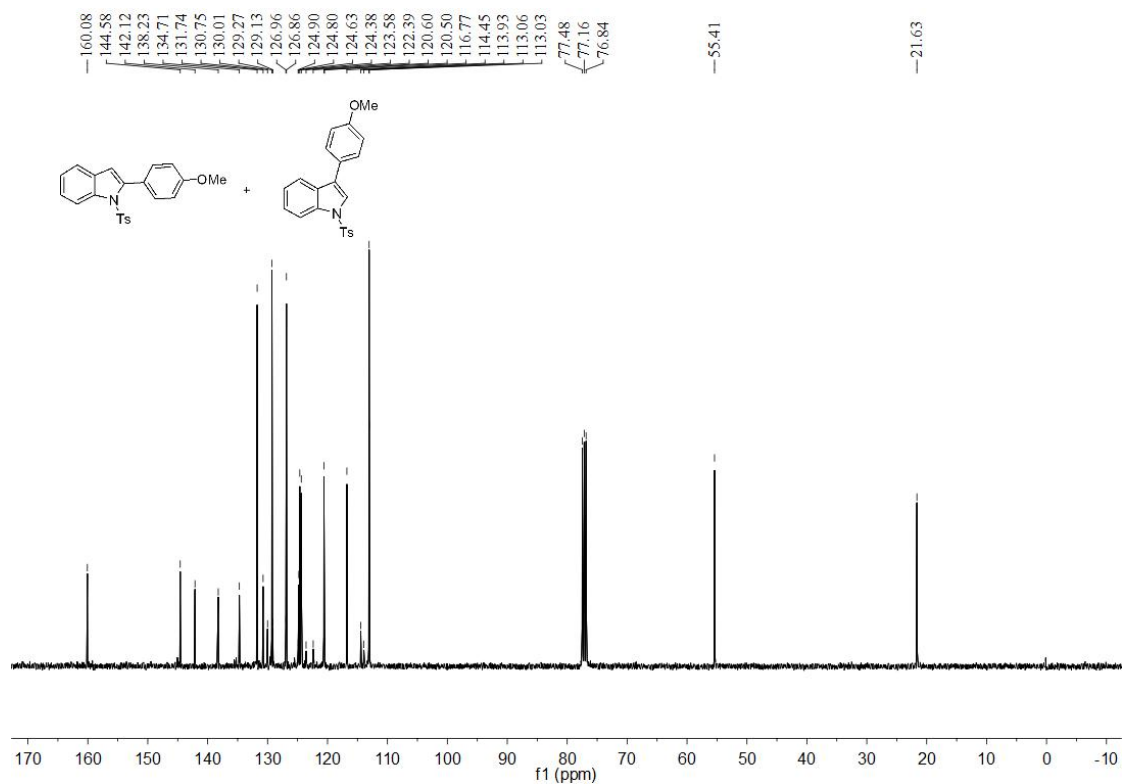

# NMR Spectra of Product 2n

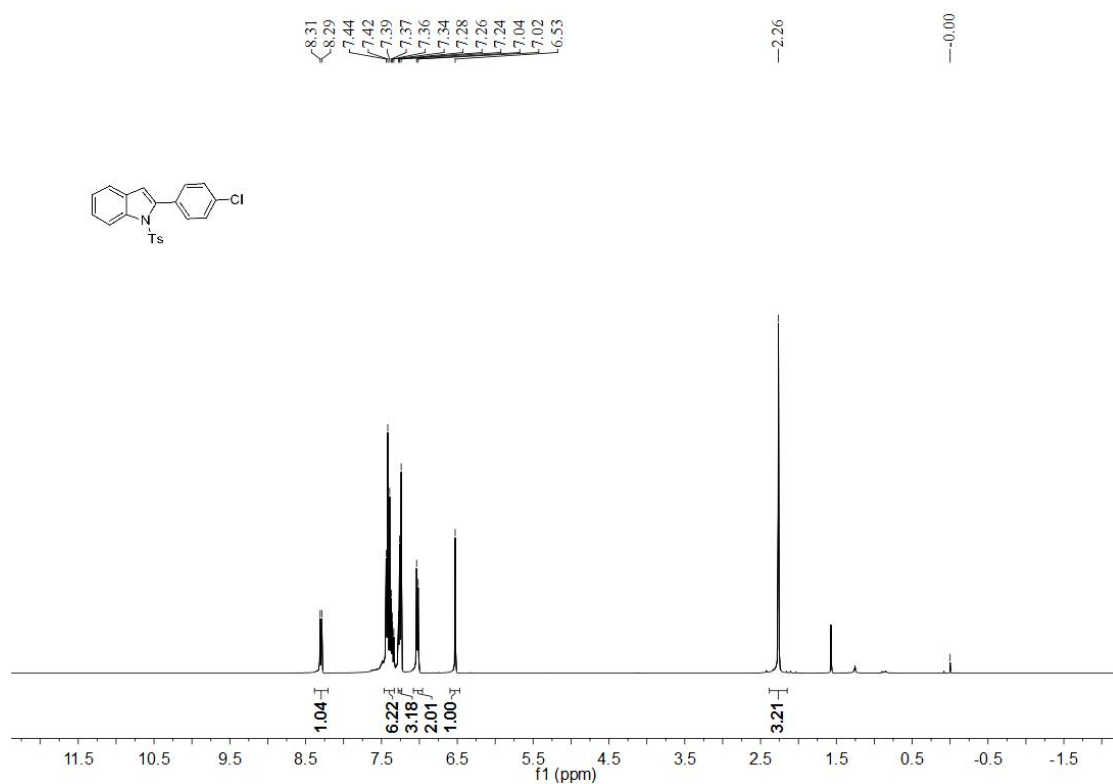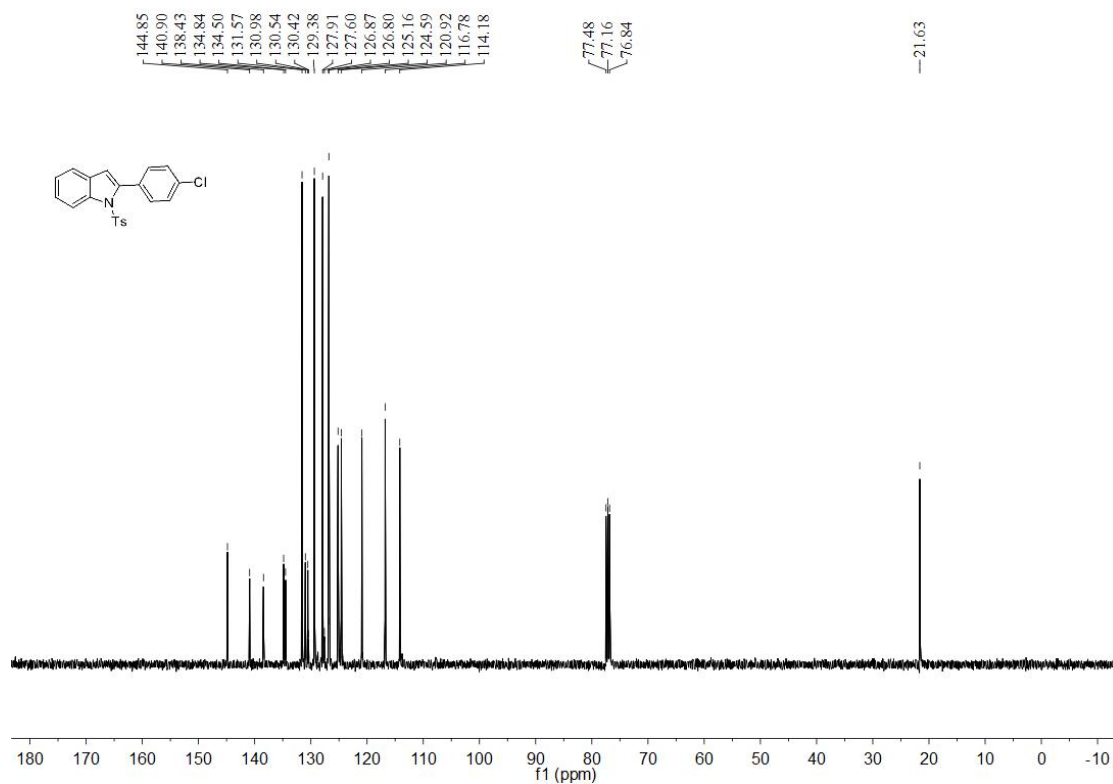

## NMR Spectra of Product 2o

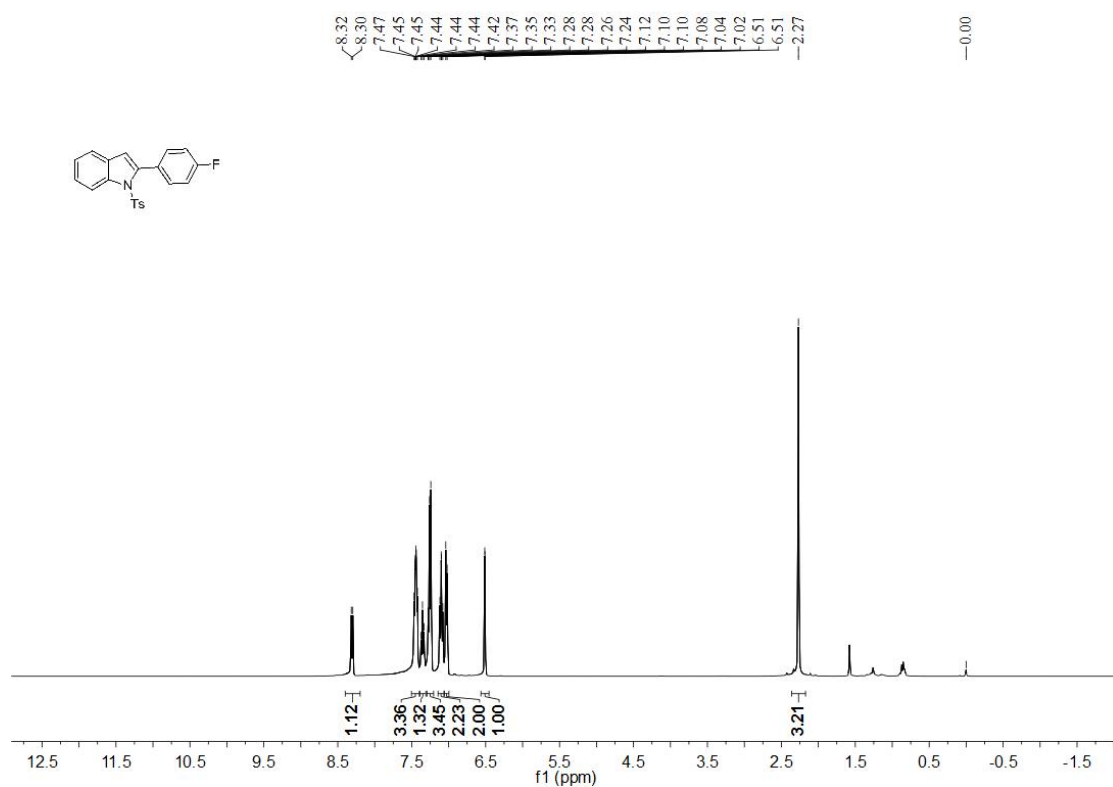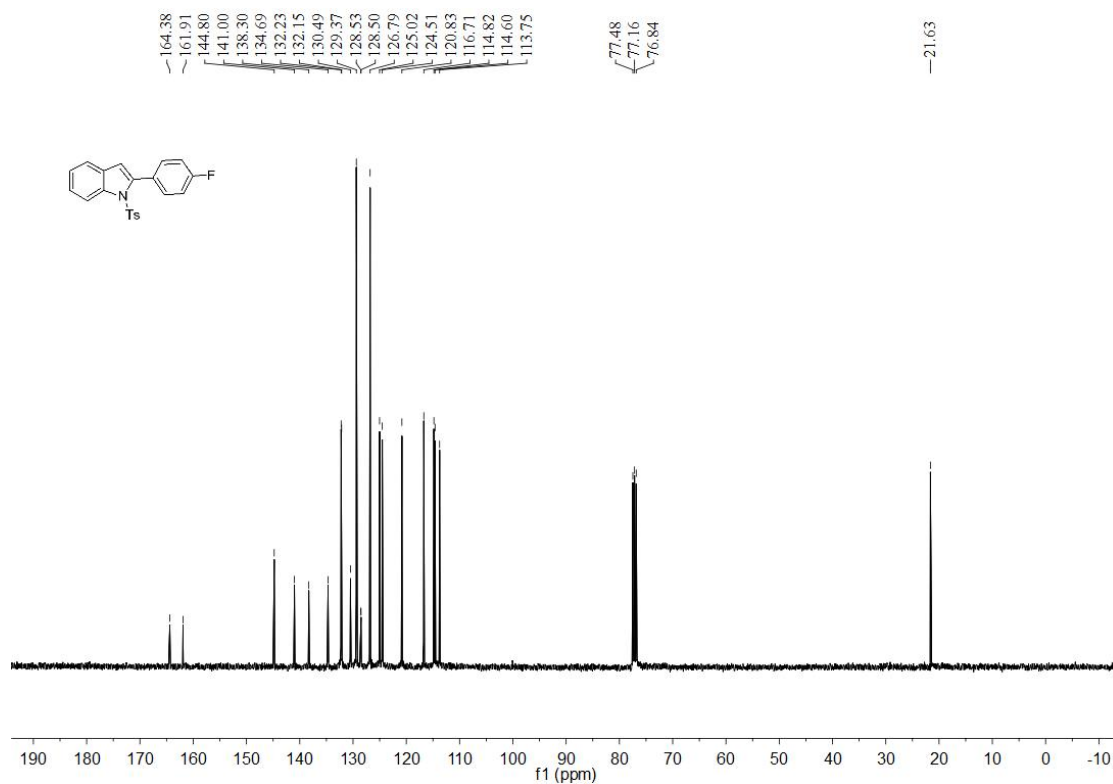

# NMR Spectra of Product 2p

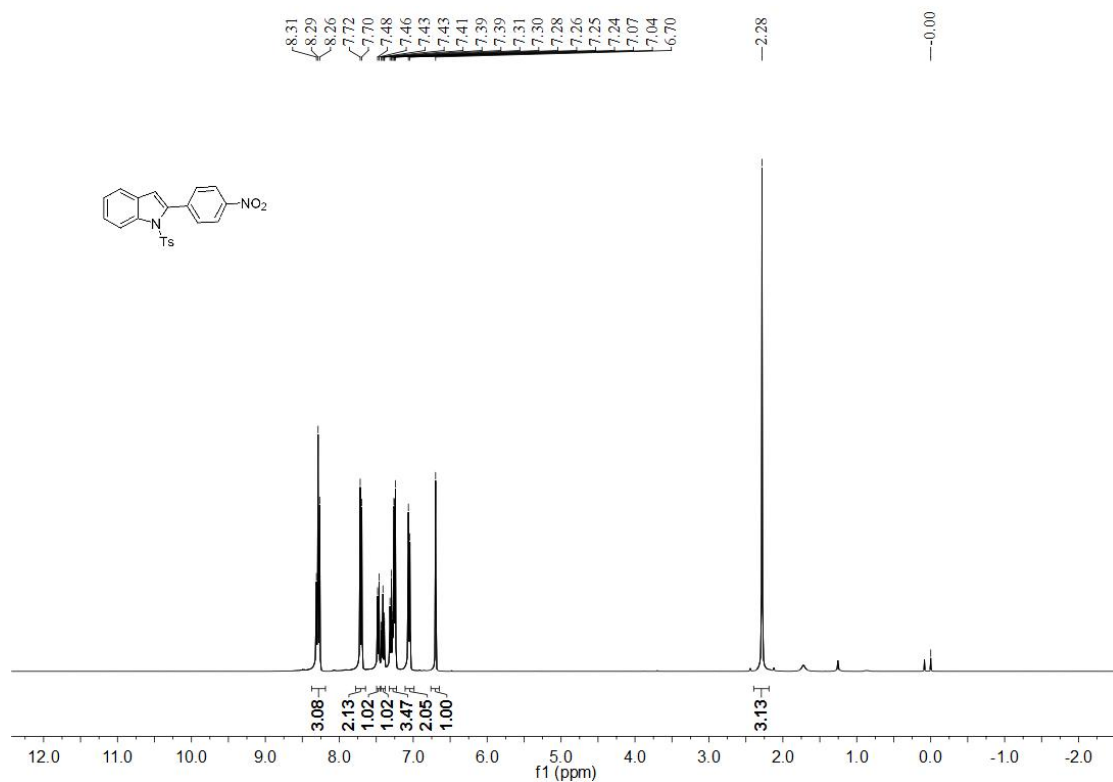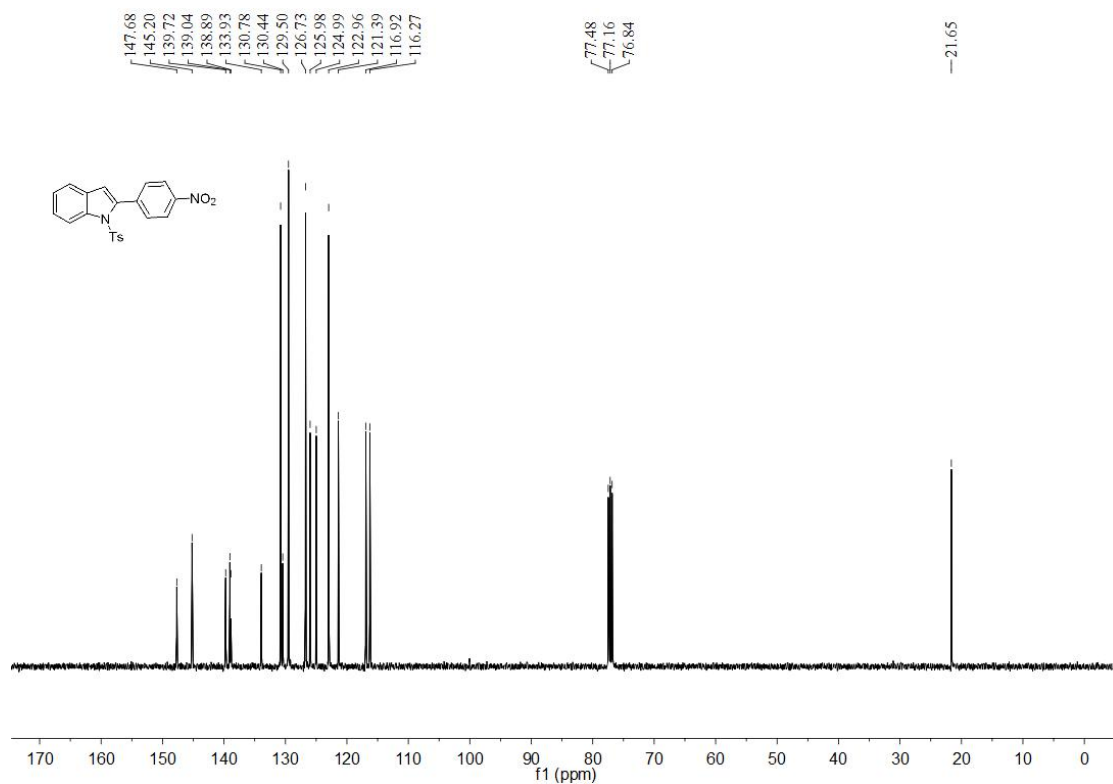

# NMR Spectra of Product 2q

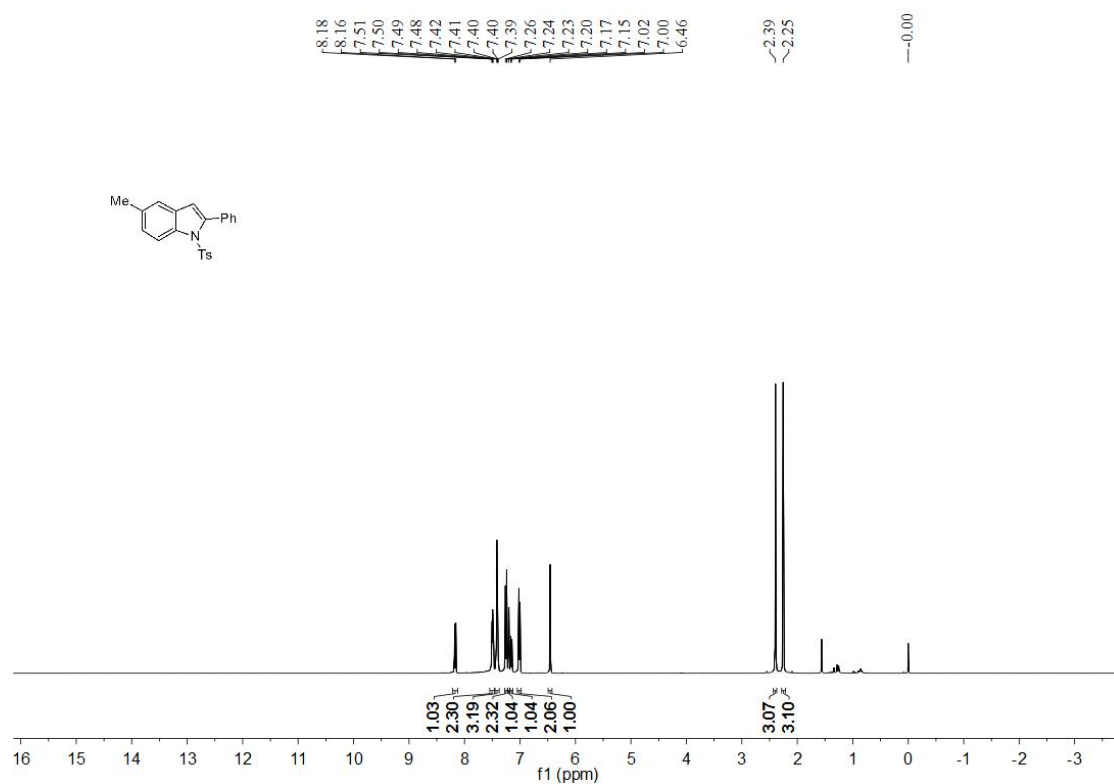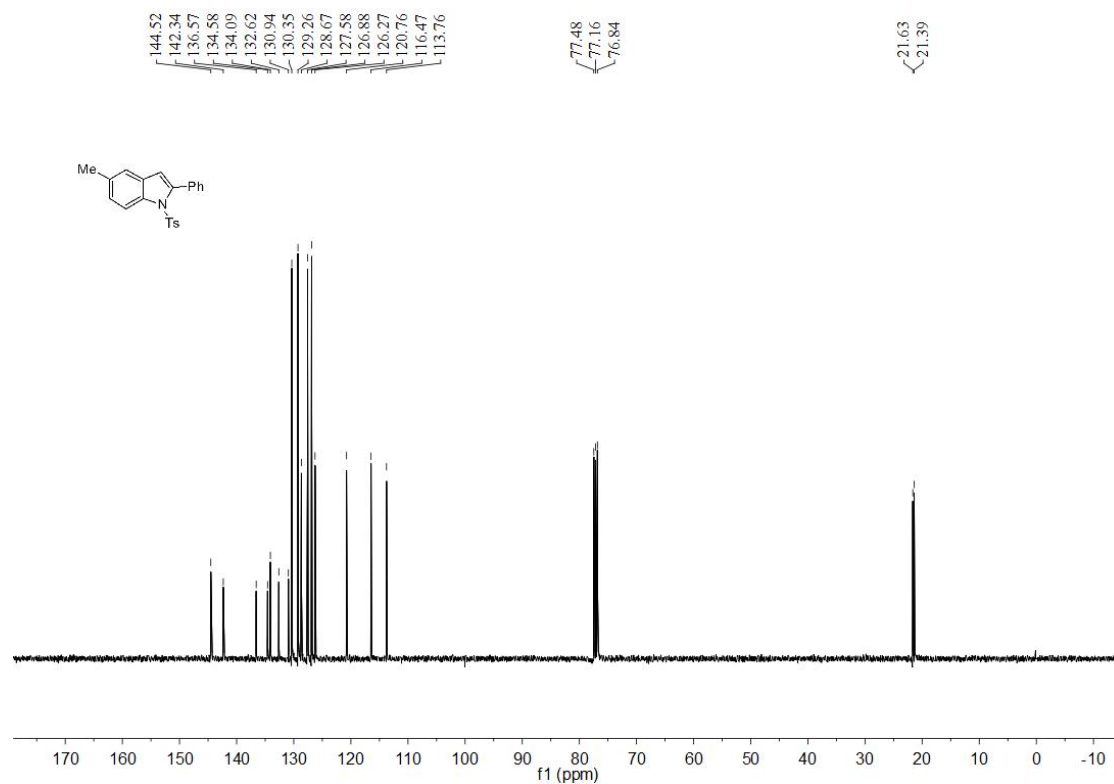

## NMR Spectra of Product 2r

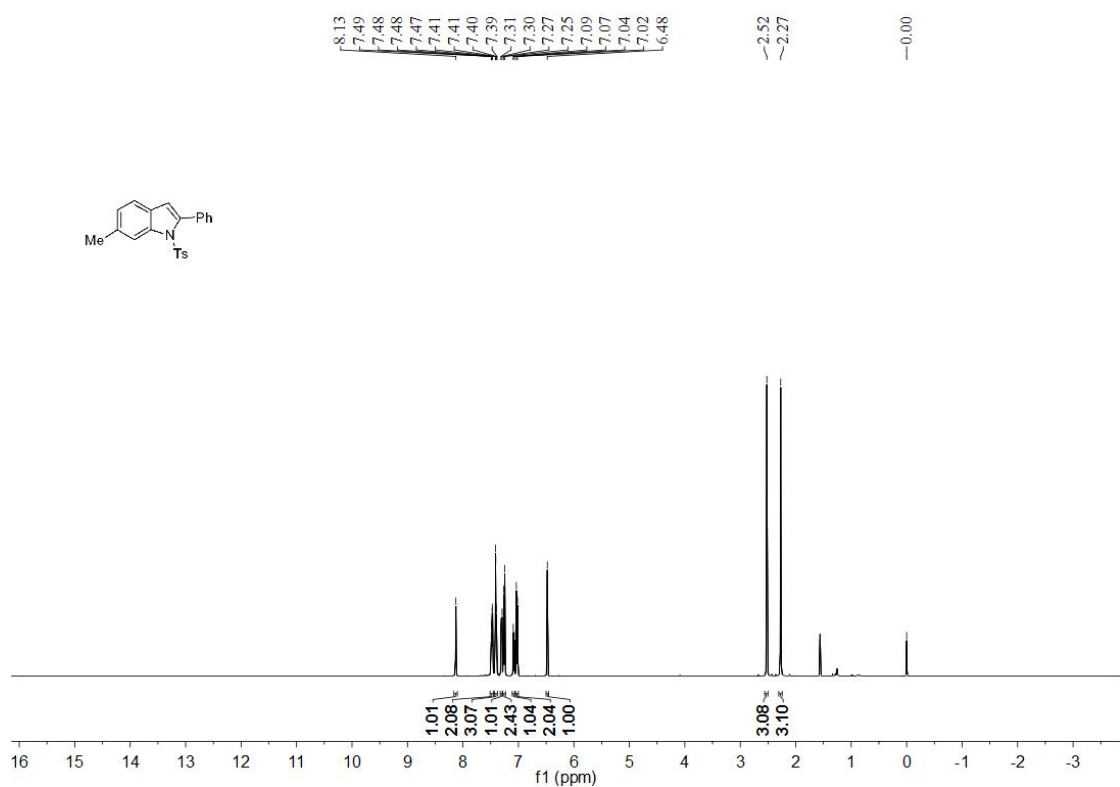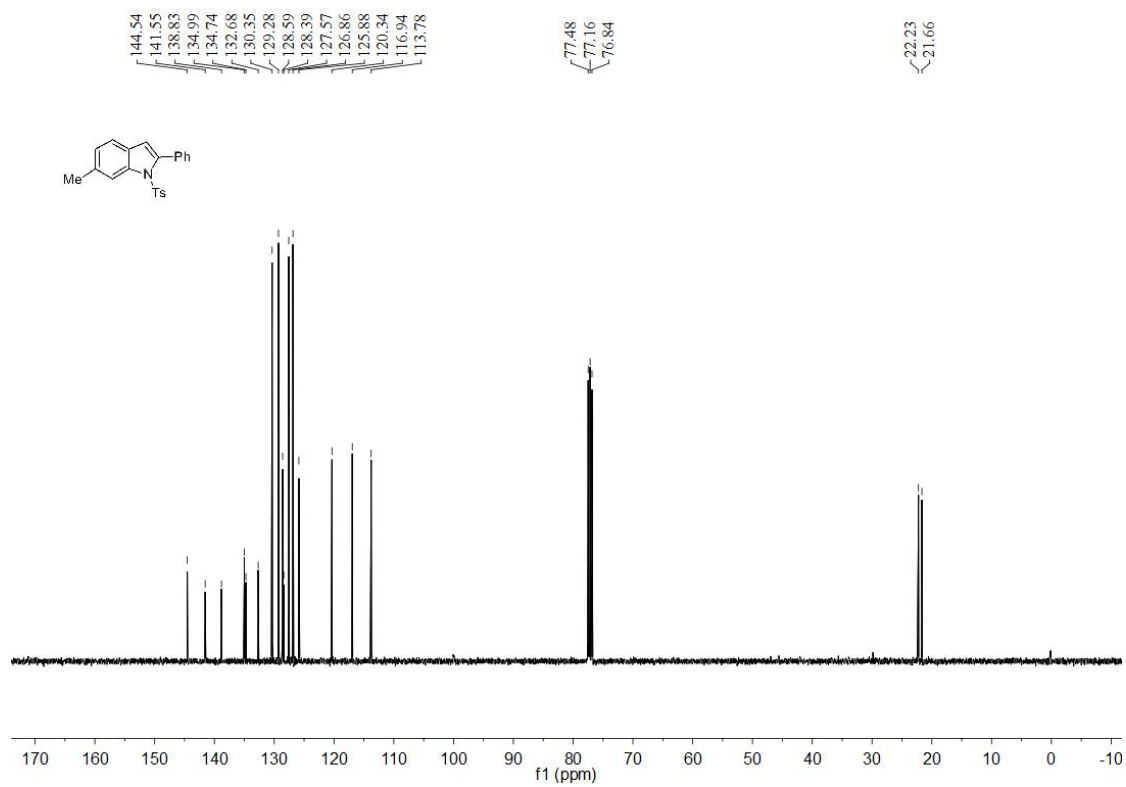

# NMR Spectra of Product 2s

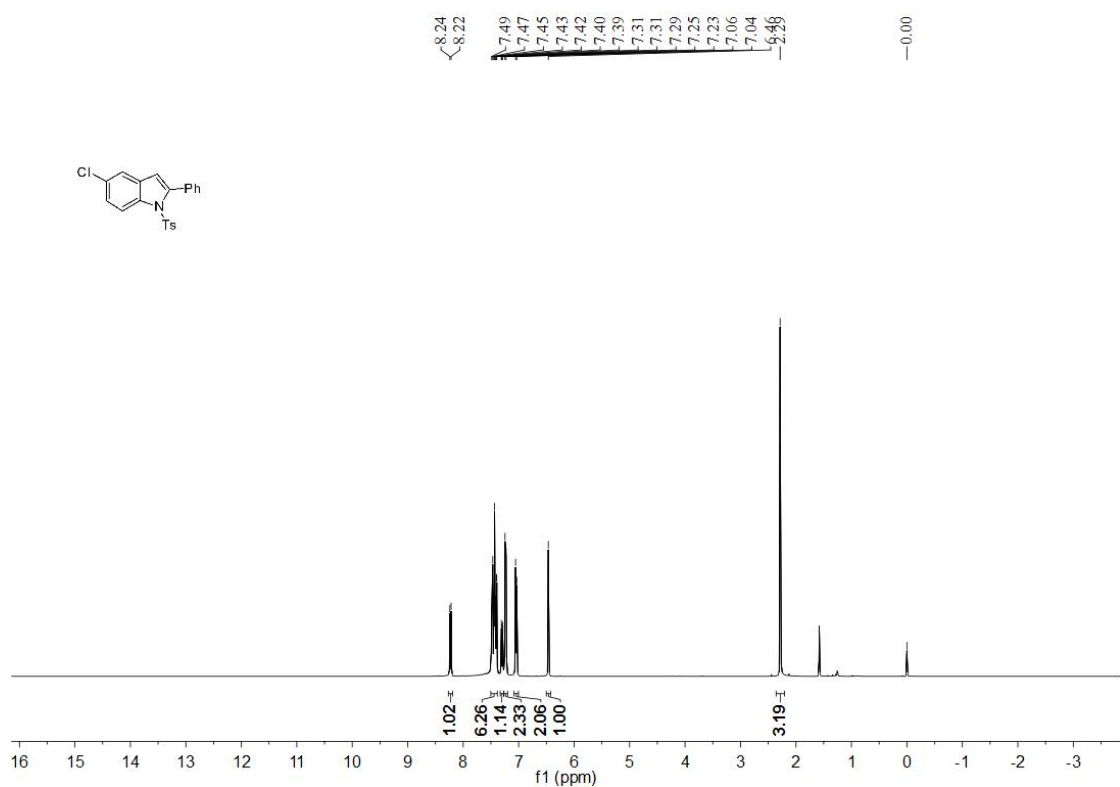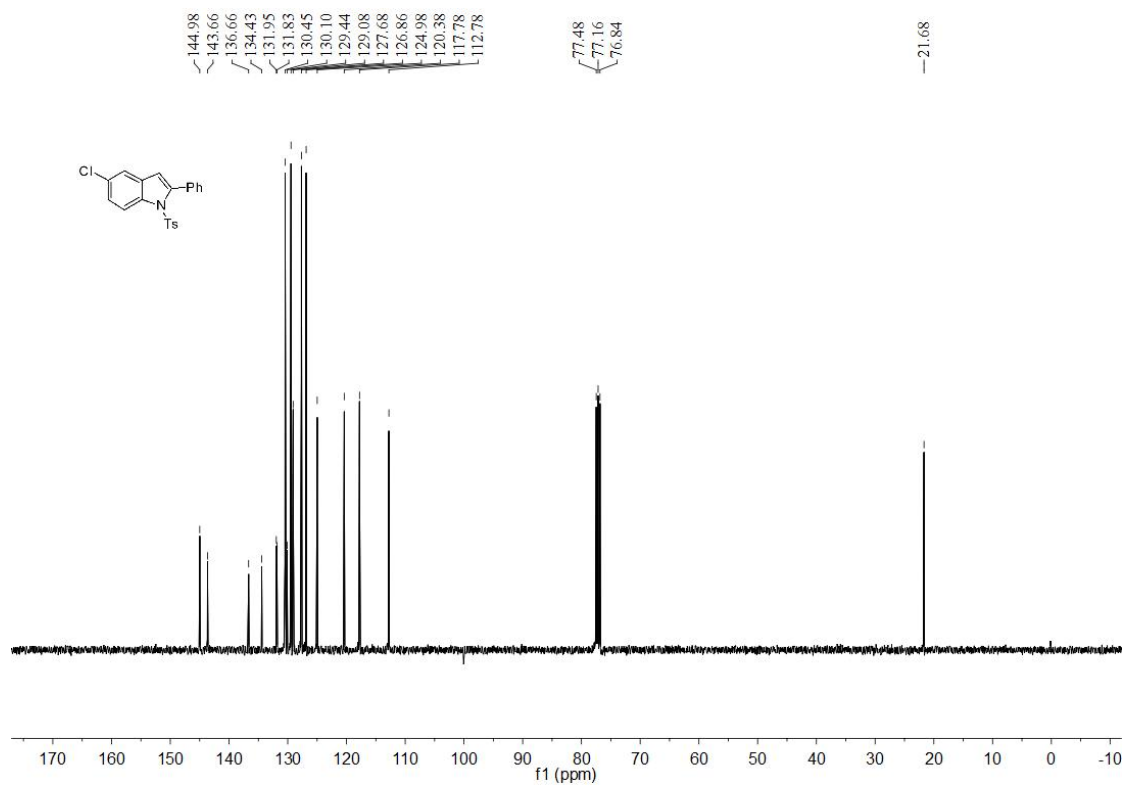



# NMR Spectra of Product 2t

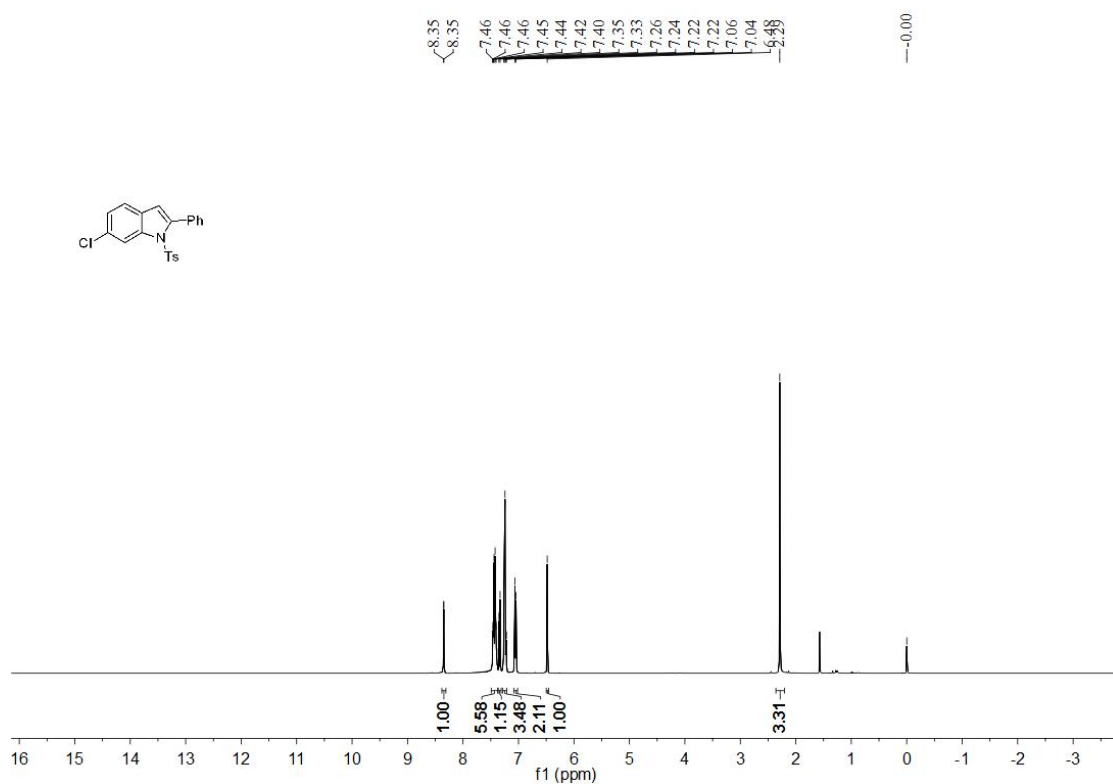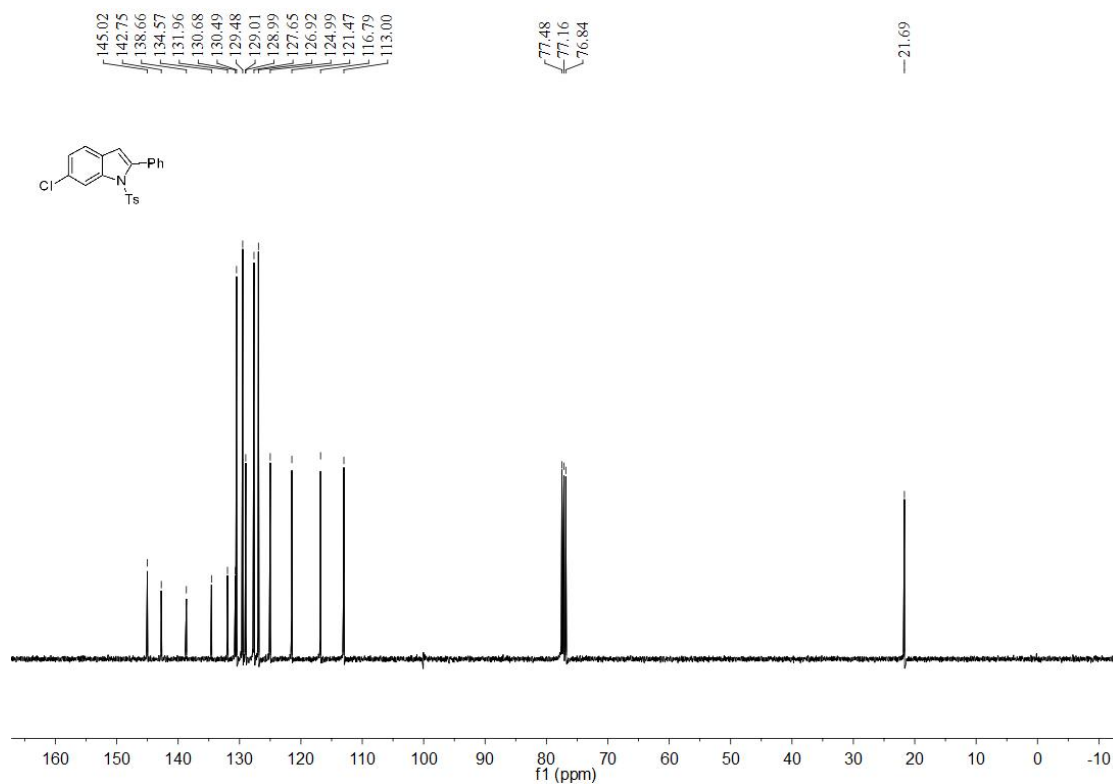

# NMR Spectra of Product 2u

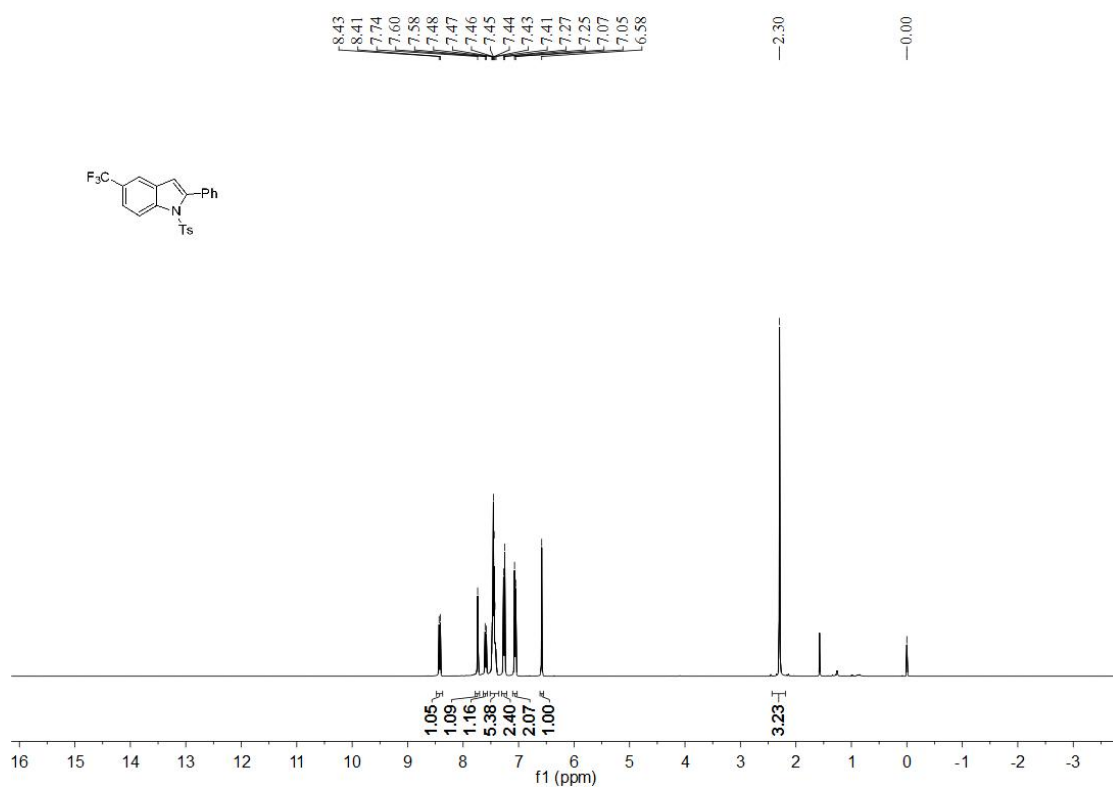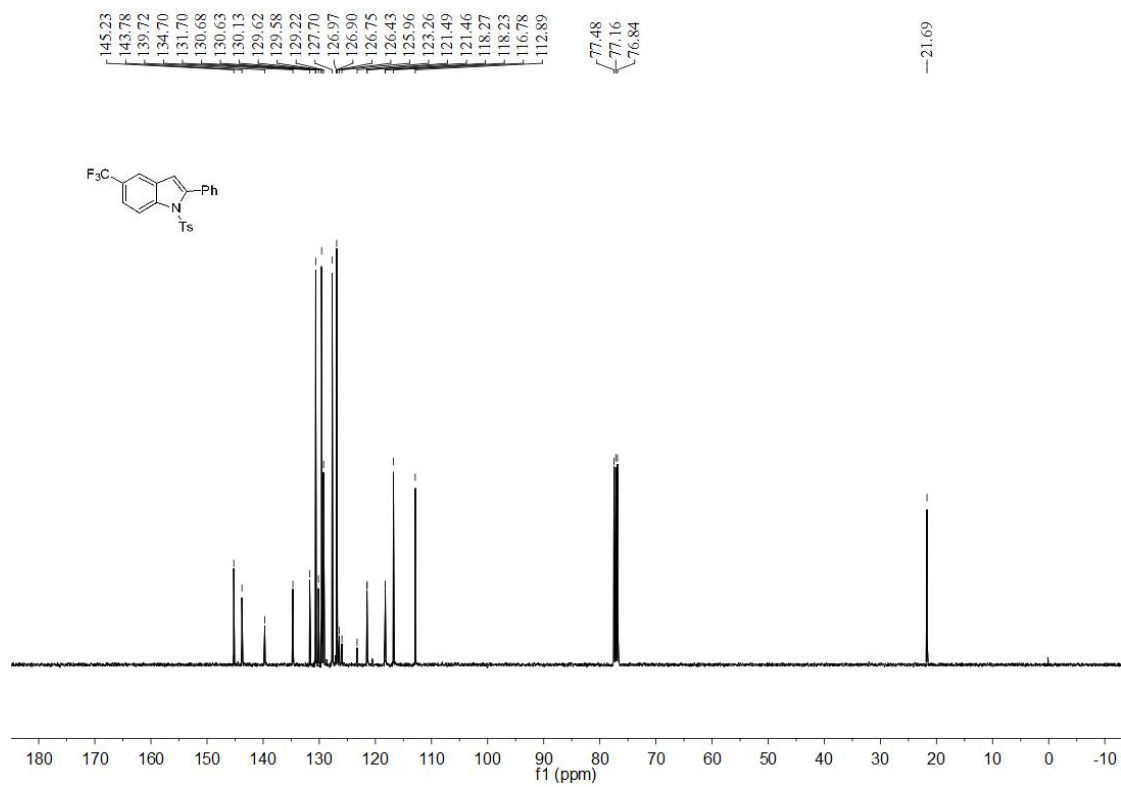

# NMR Spectra of Product 2v

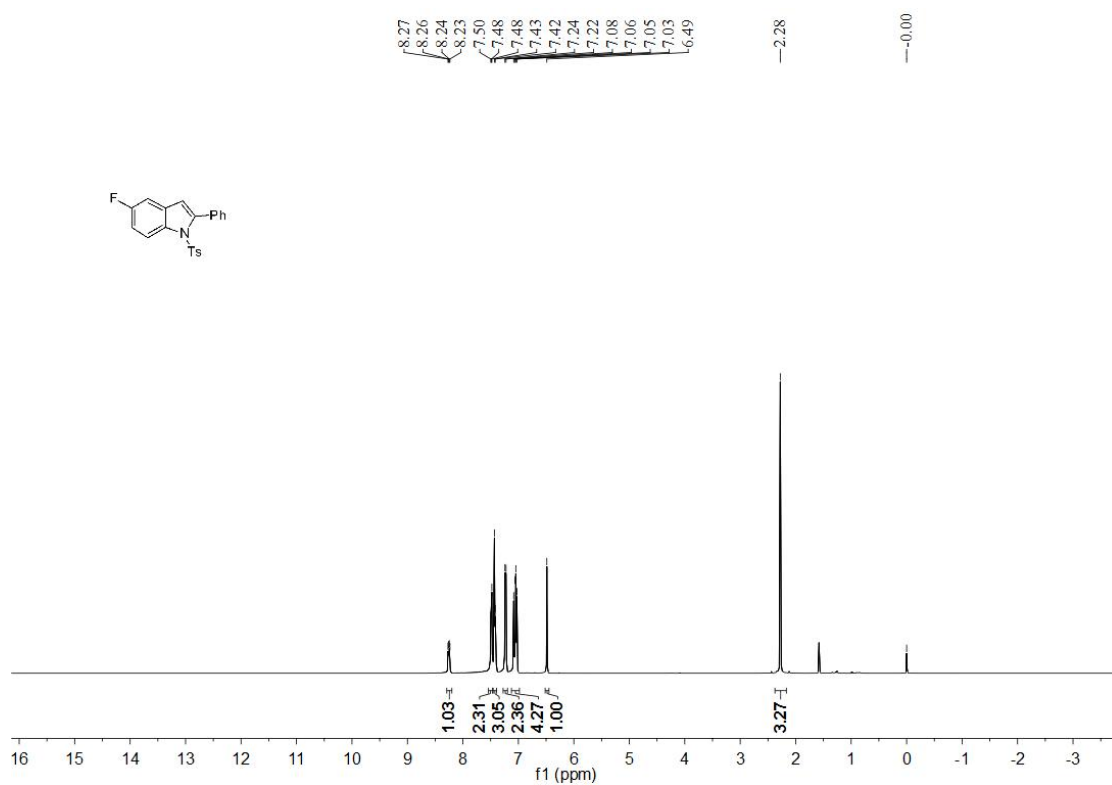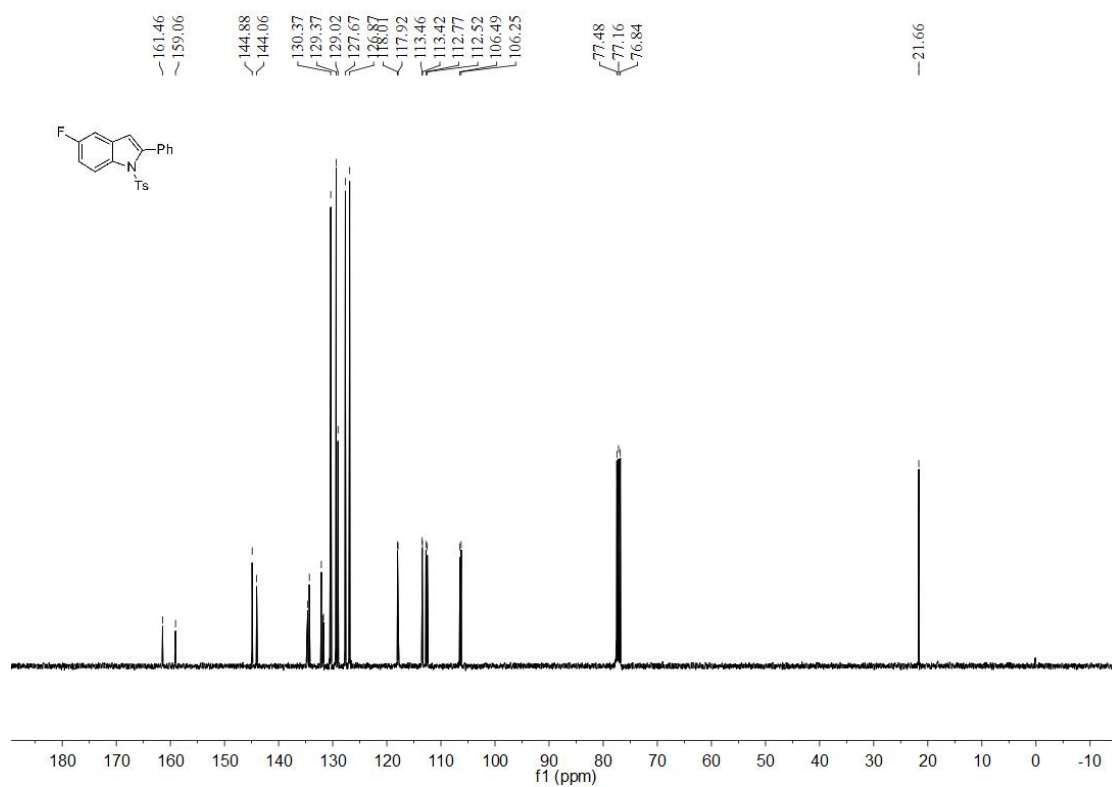

# NMR Spectra of Product 4

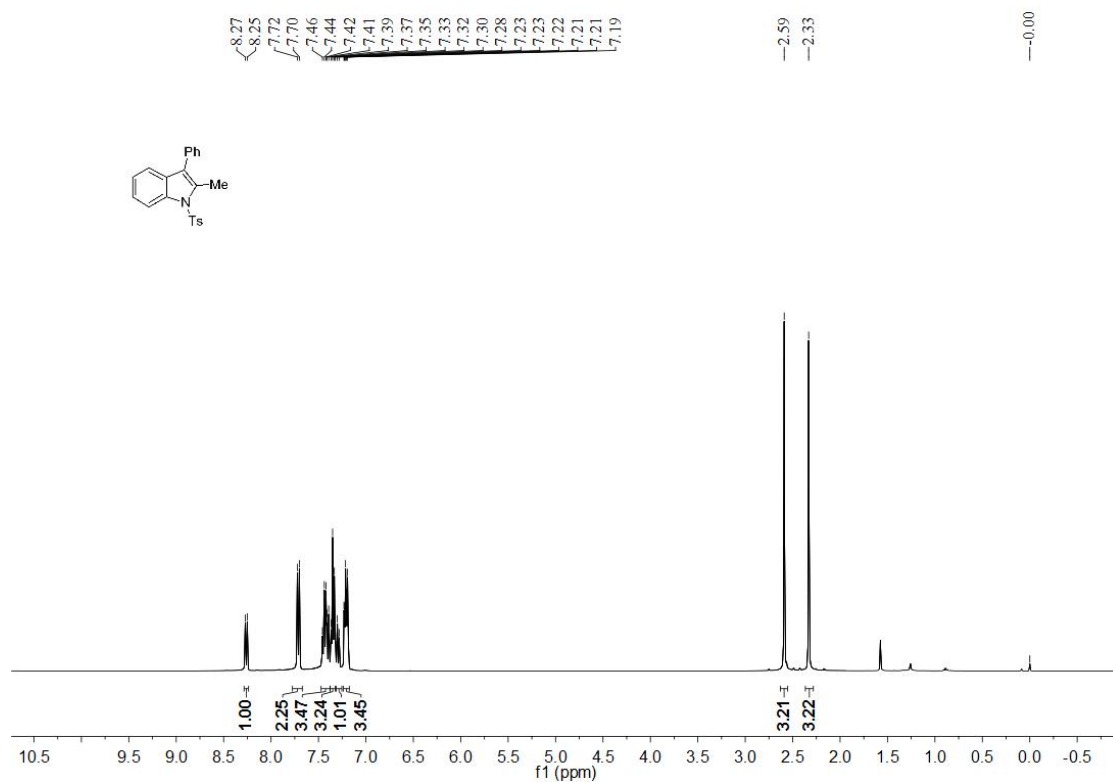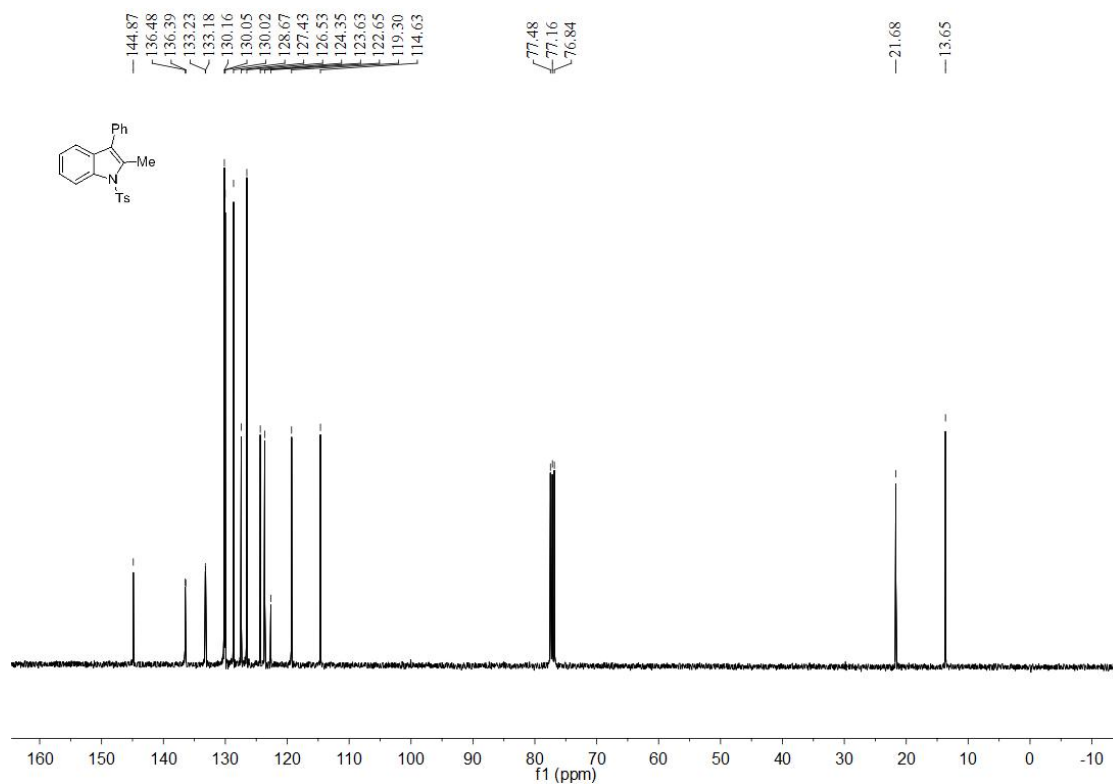

Supplement: c5qo00179j1.pdf [file c5qo00179j1.pdf]
